# Supplementary material for: Histone H3 lysine 4 acetylation and methylation dynamics define breast cancer subtypes
Source: PubMed Central journal article supplement (PMC4868673; doi:10.18632/oncotarget.6922), 2016-01-15

# CHARAFE\_BREAST\_CANCER\_LUMINAL\_VS\_BASAL\_DN

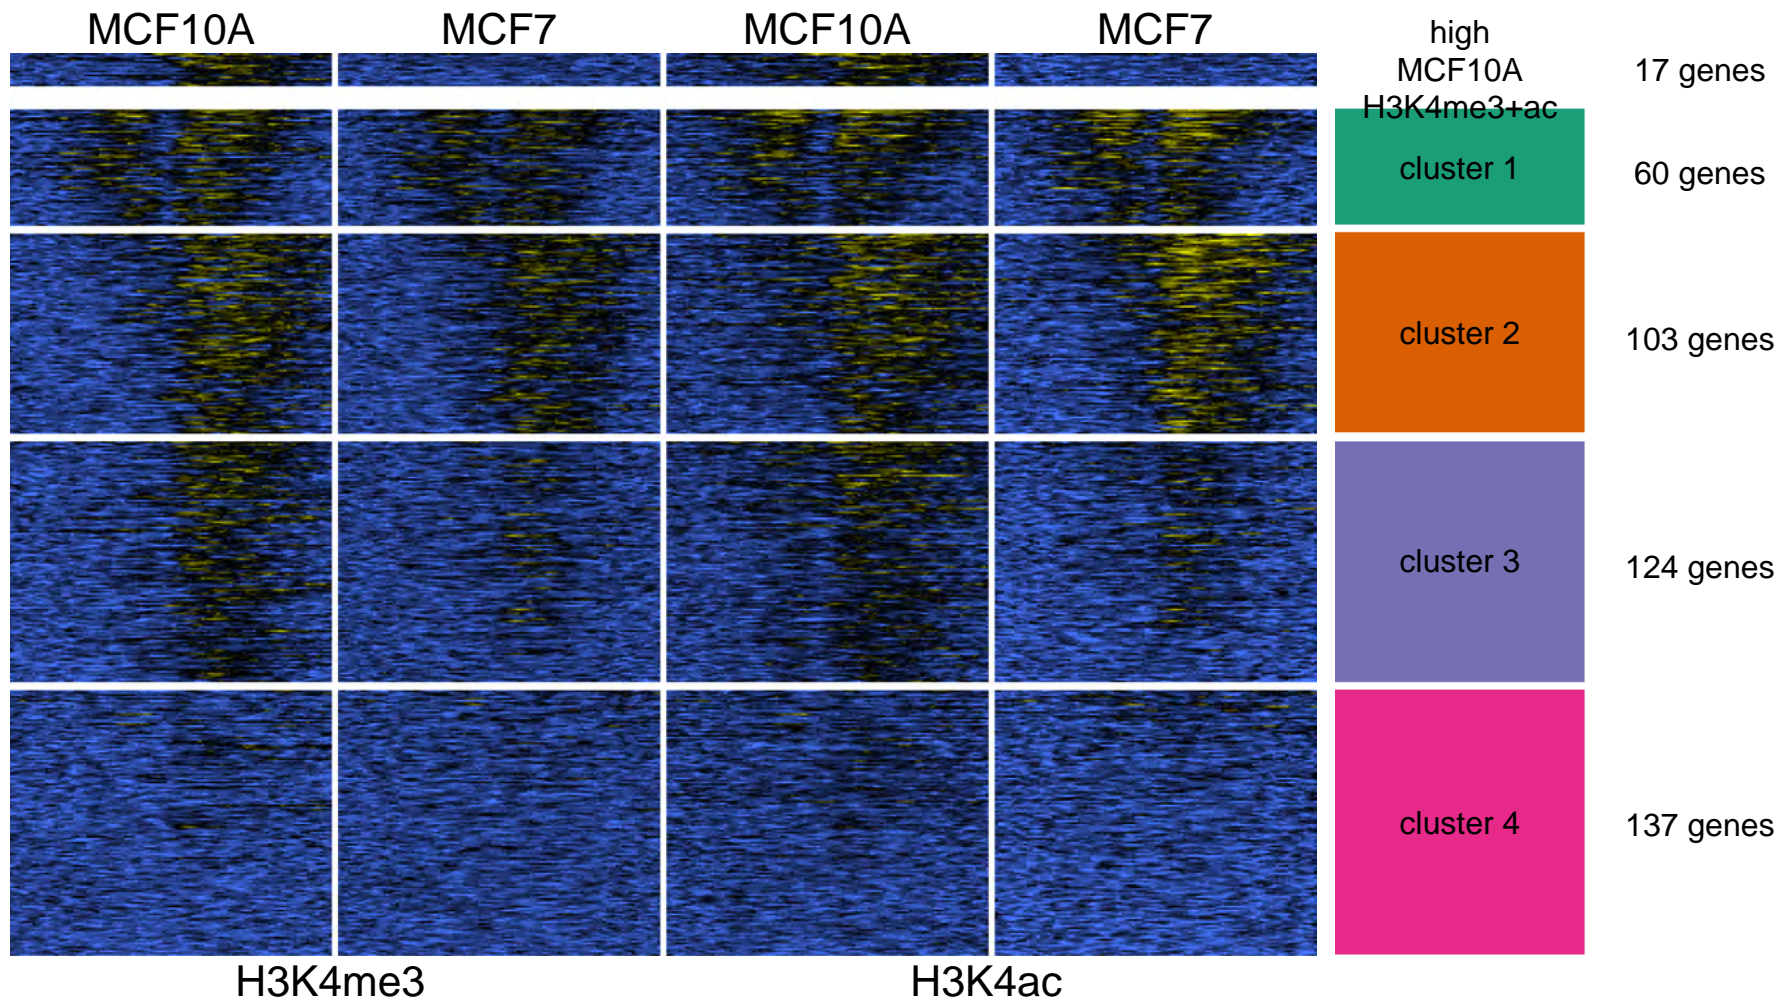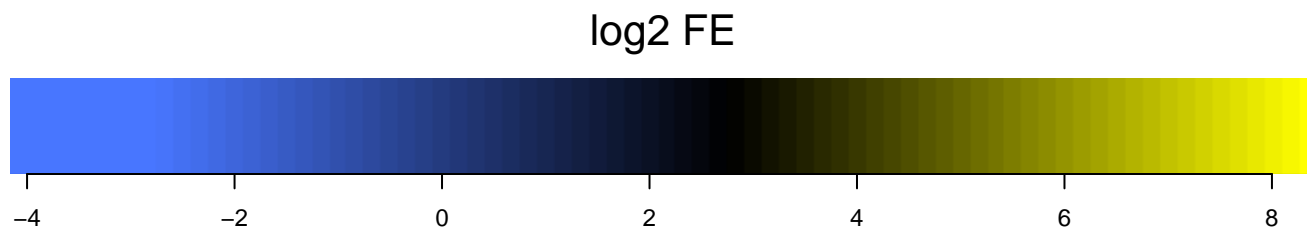

# CHARAFE\_BREAST\_CANCER\_LUMINAL\_VS\_BASAL\_DN

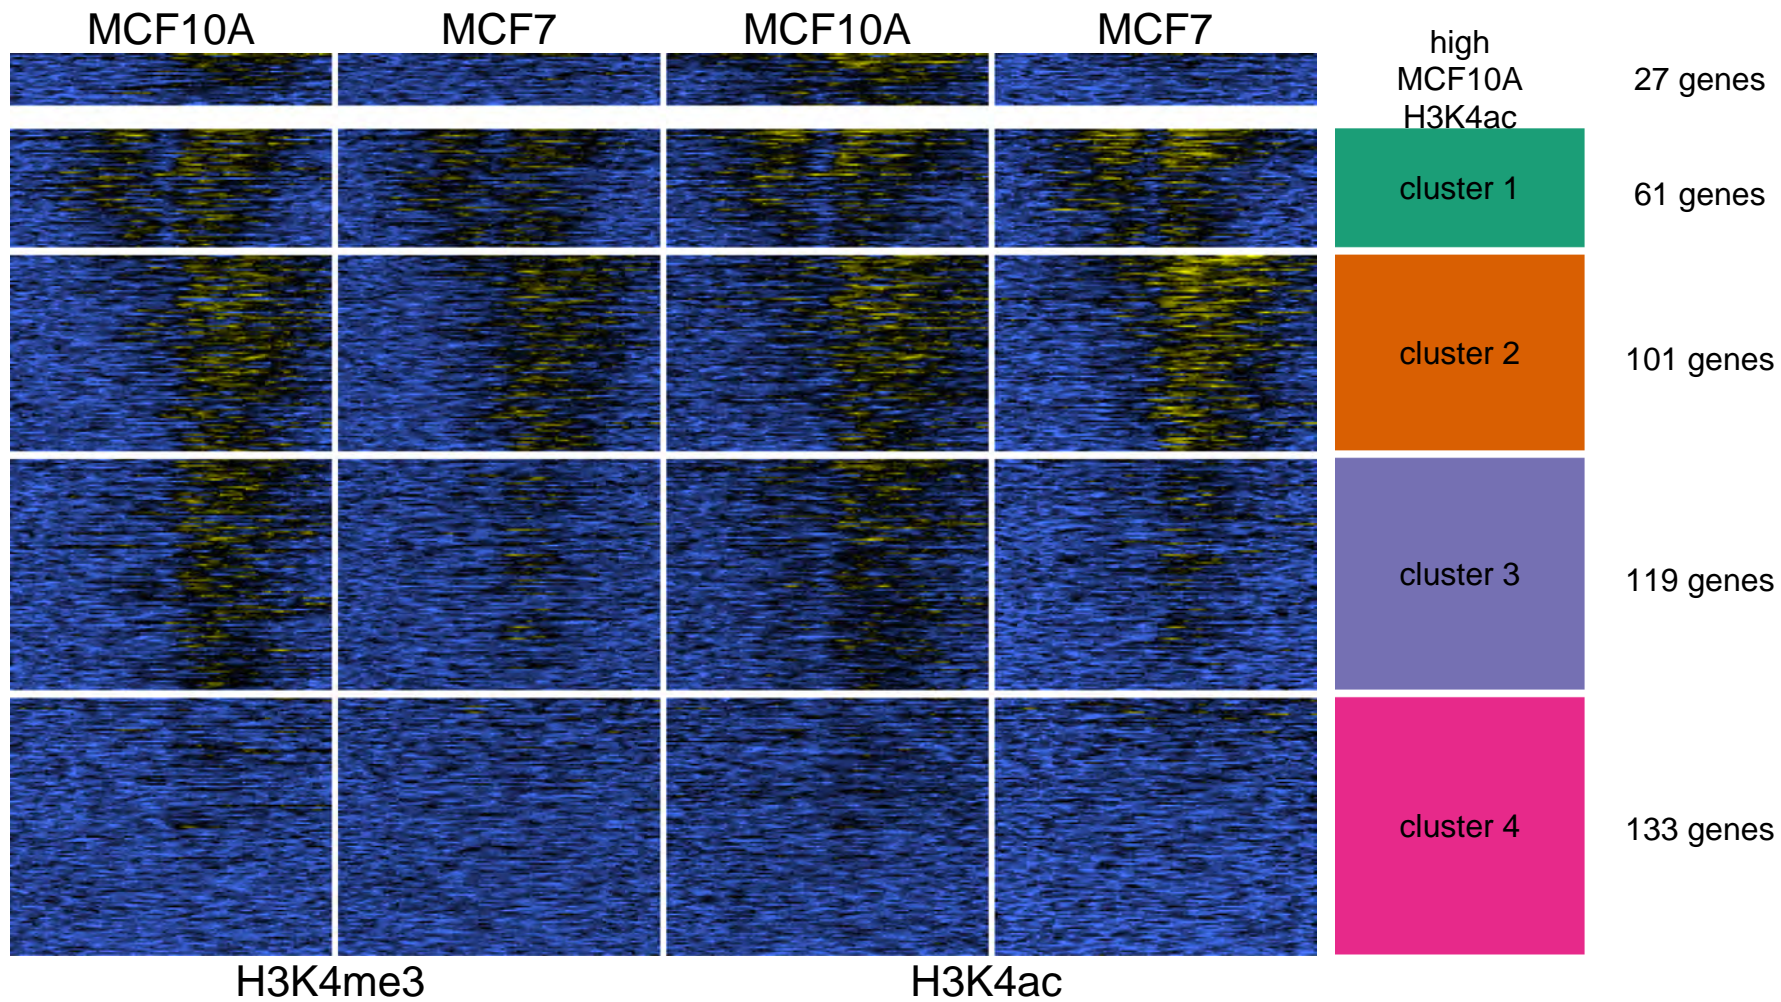

# ONDER\_CDH1\_TARGETS\_2\_DN

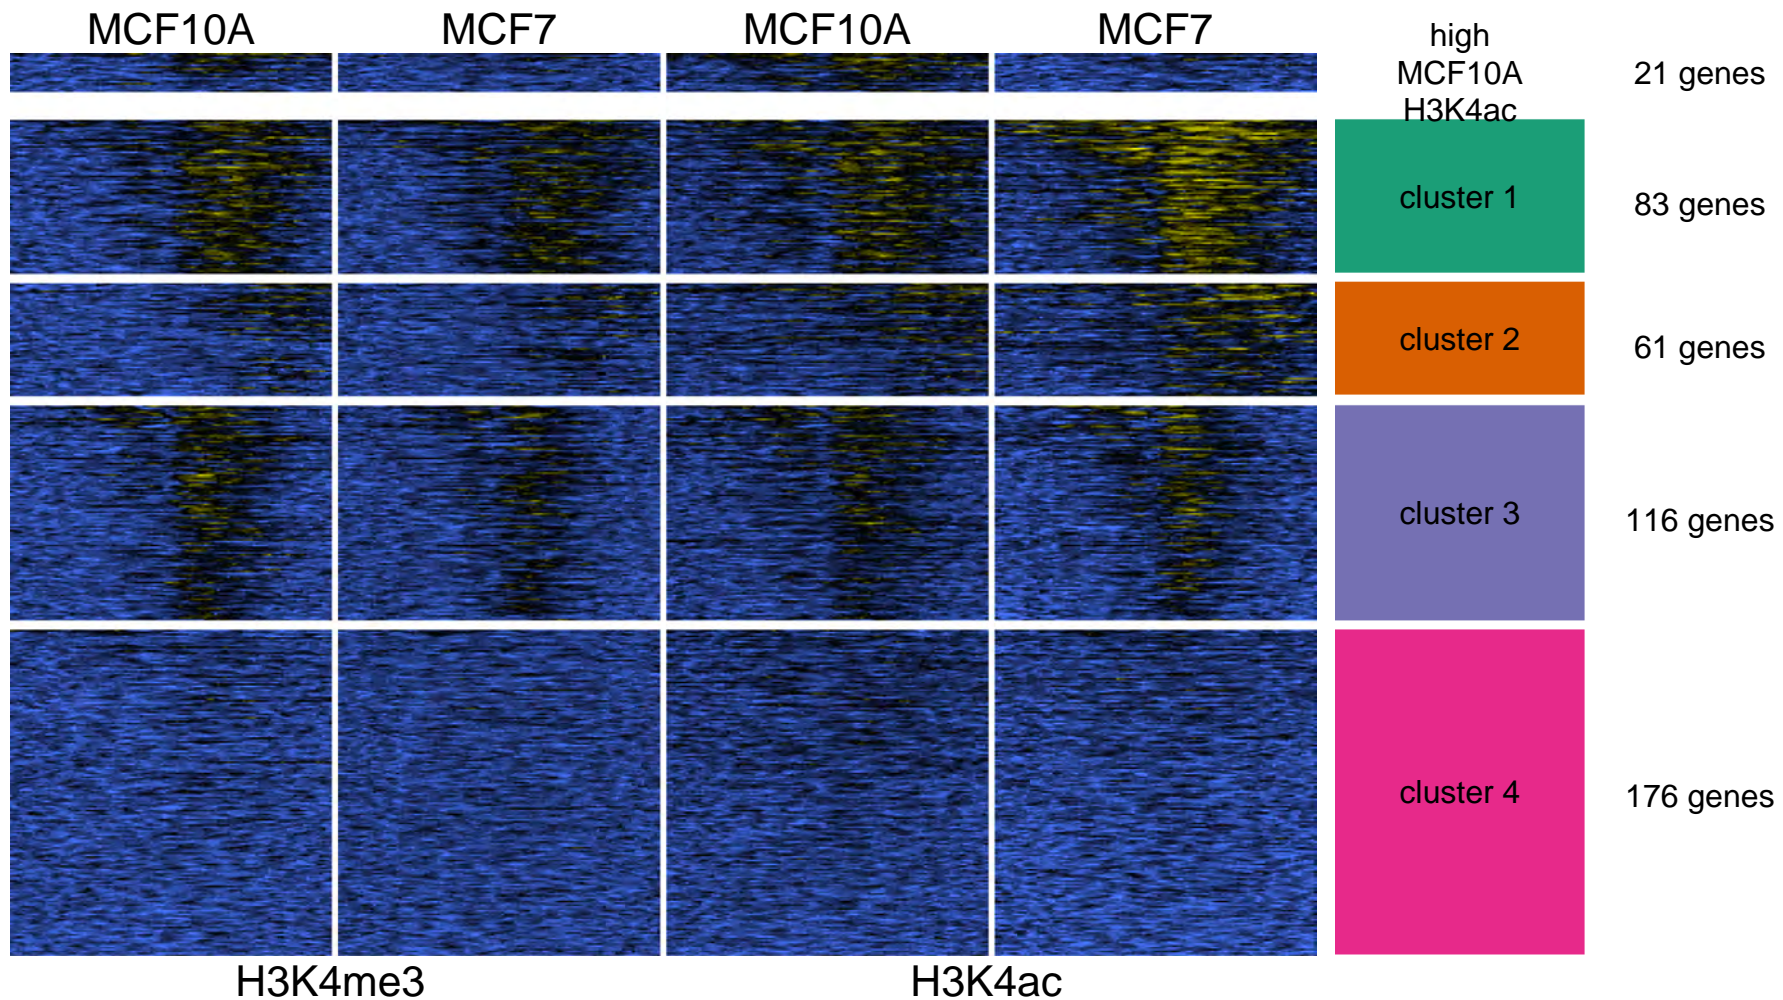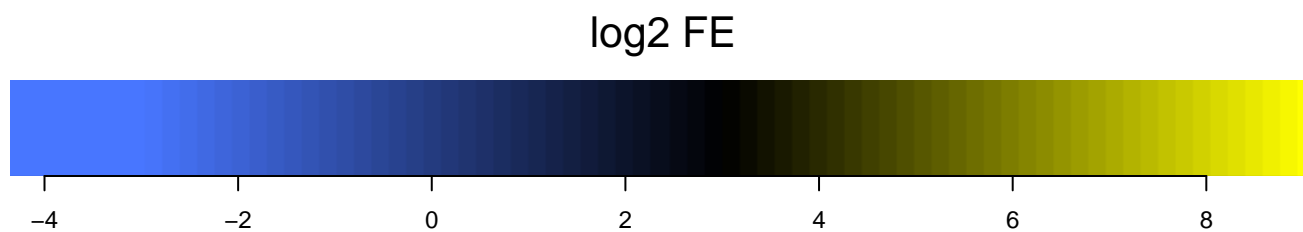

# CHARAFE\_BREAST\_CANCER\_LUMINAL\_VS\_BASAL\_DN

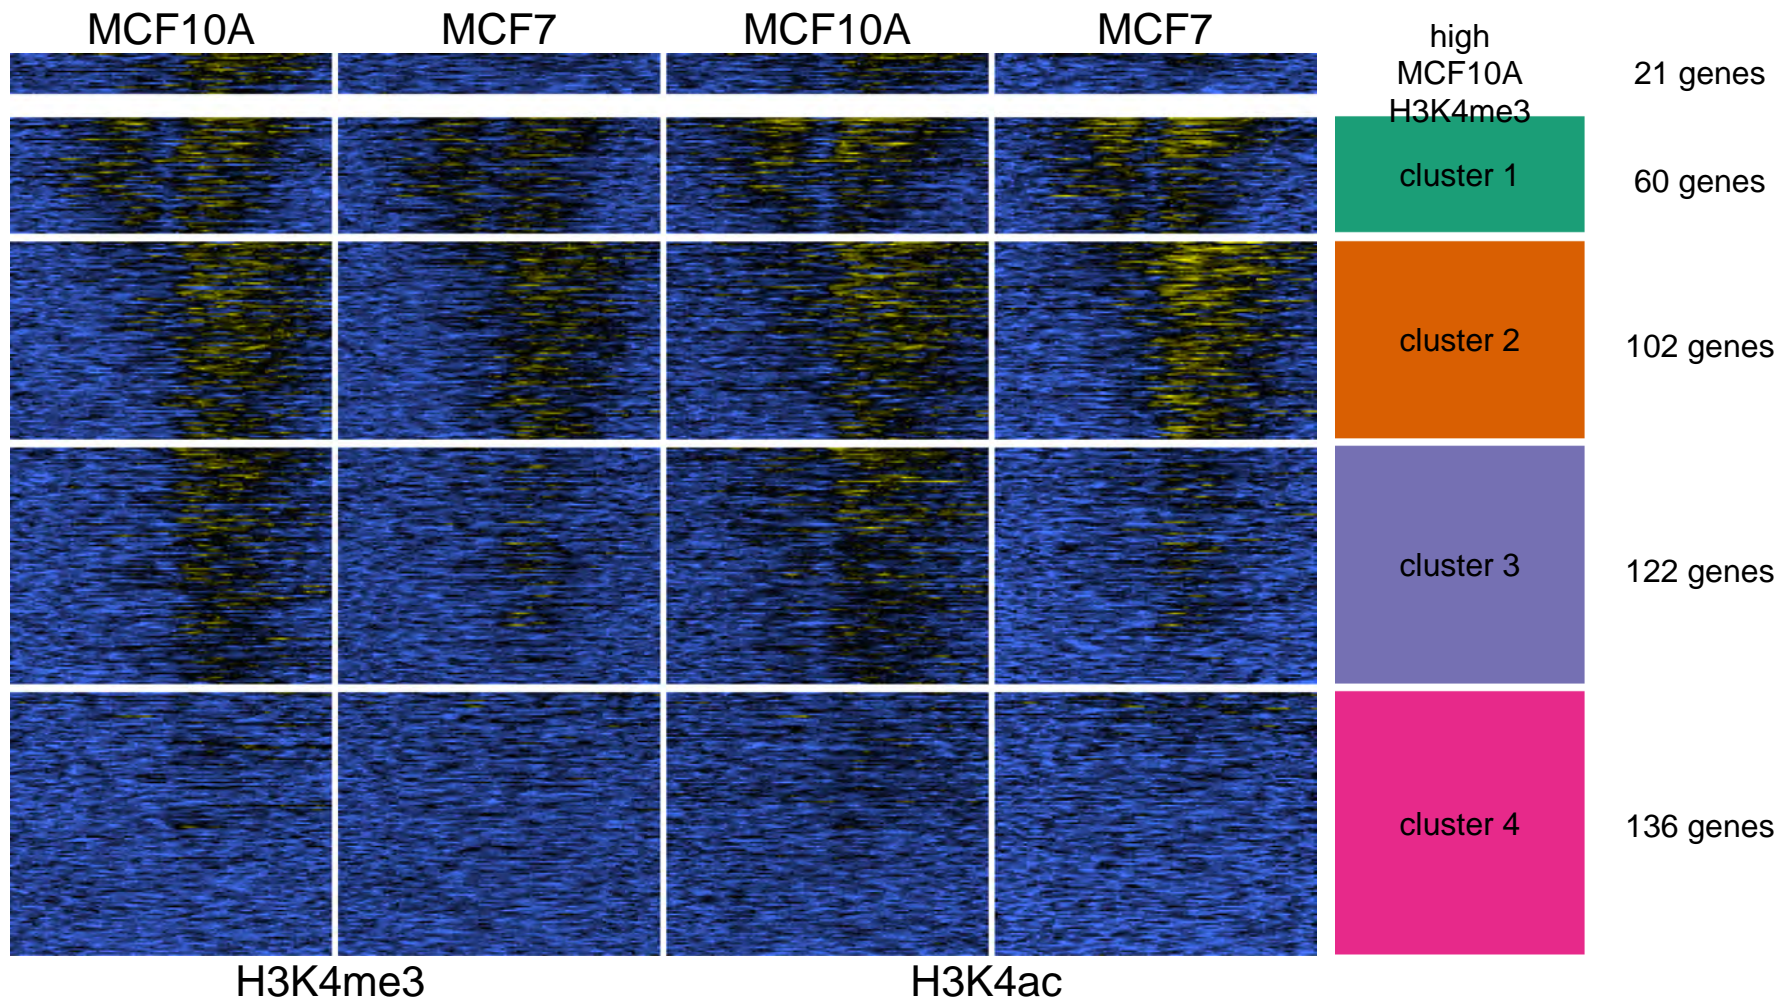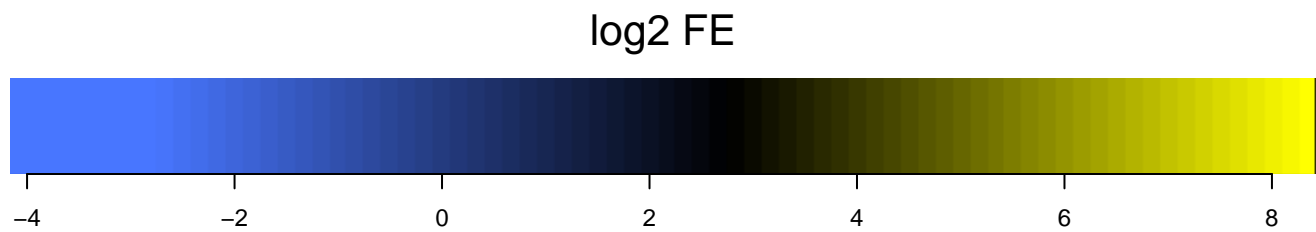

# GOZGIT\_ESR1\_TARGETS\_DN

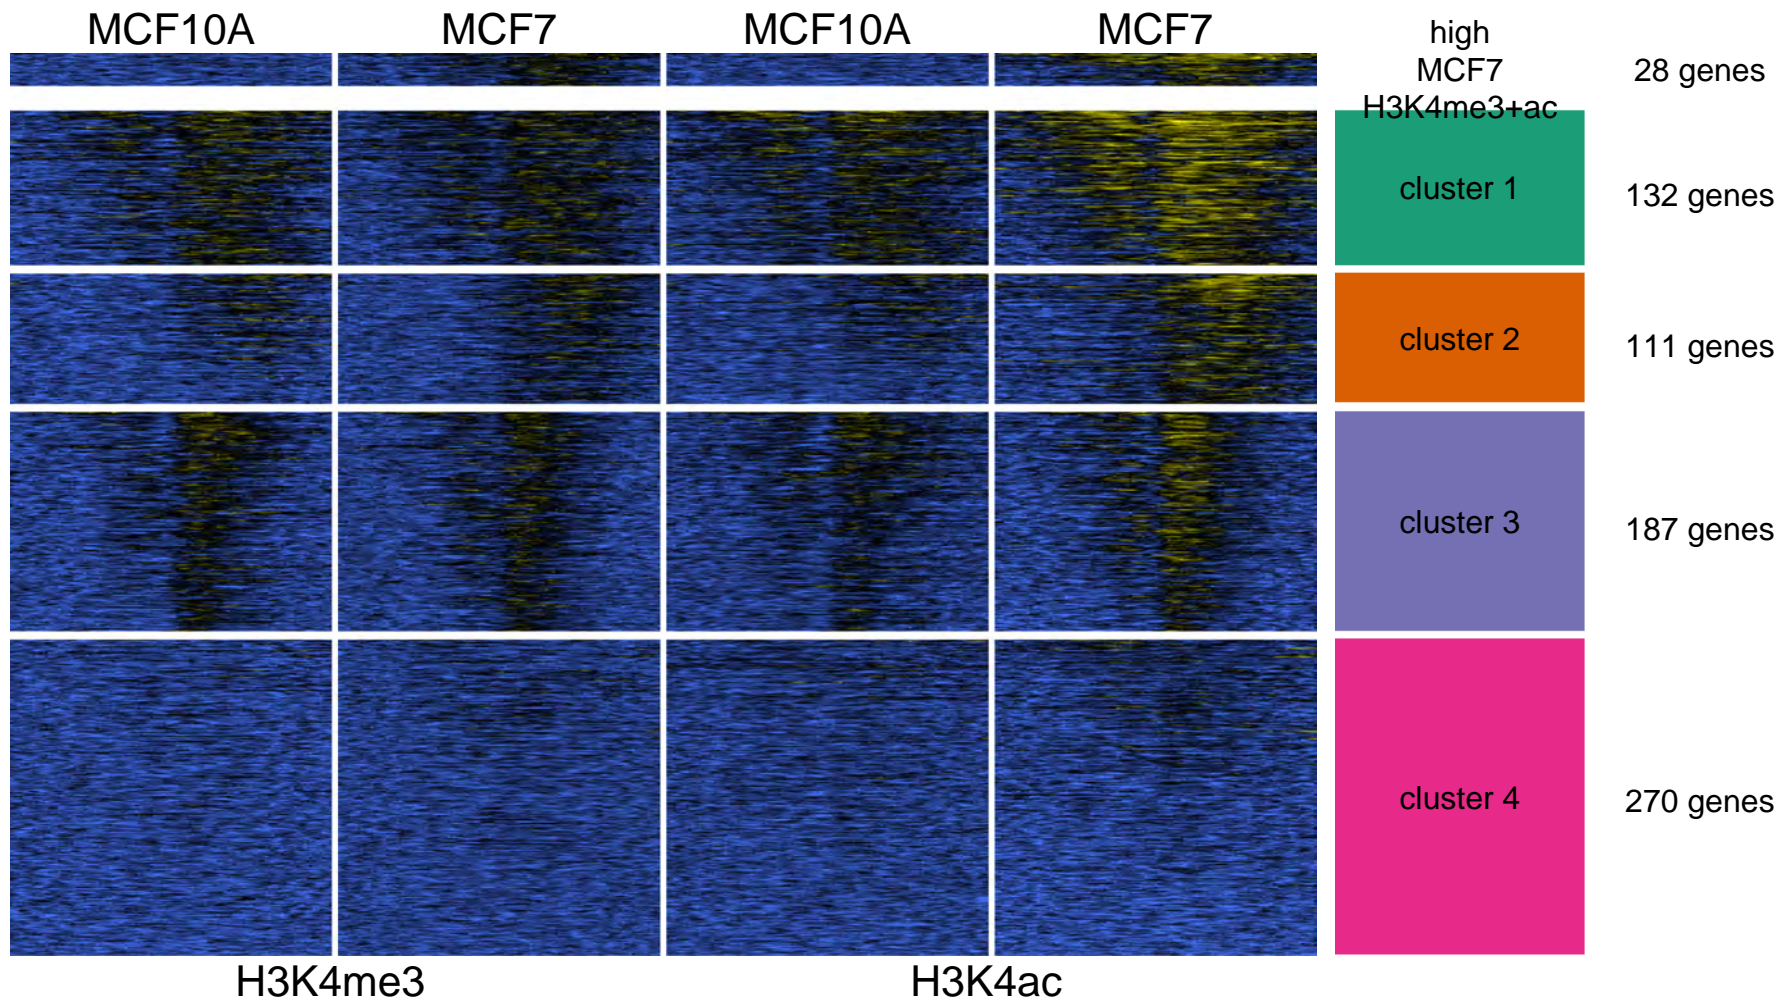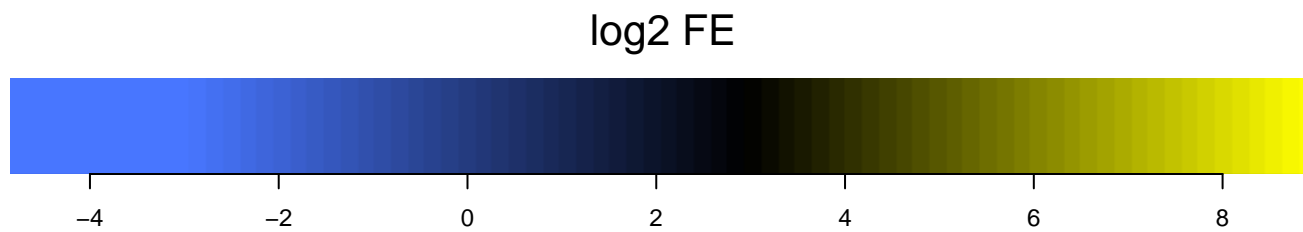

# BHAT\_ESR1\_TARGETS\_NOT\_VIA\_AKT1\_UP

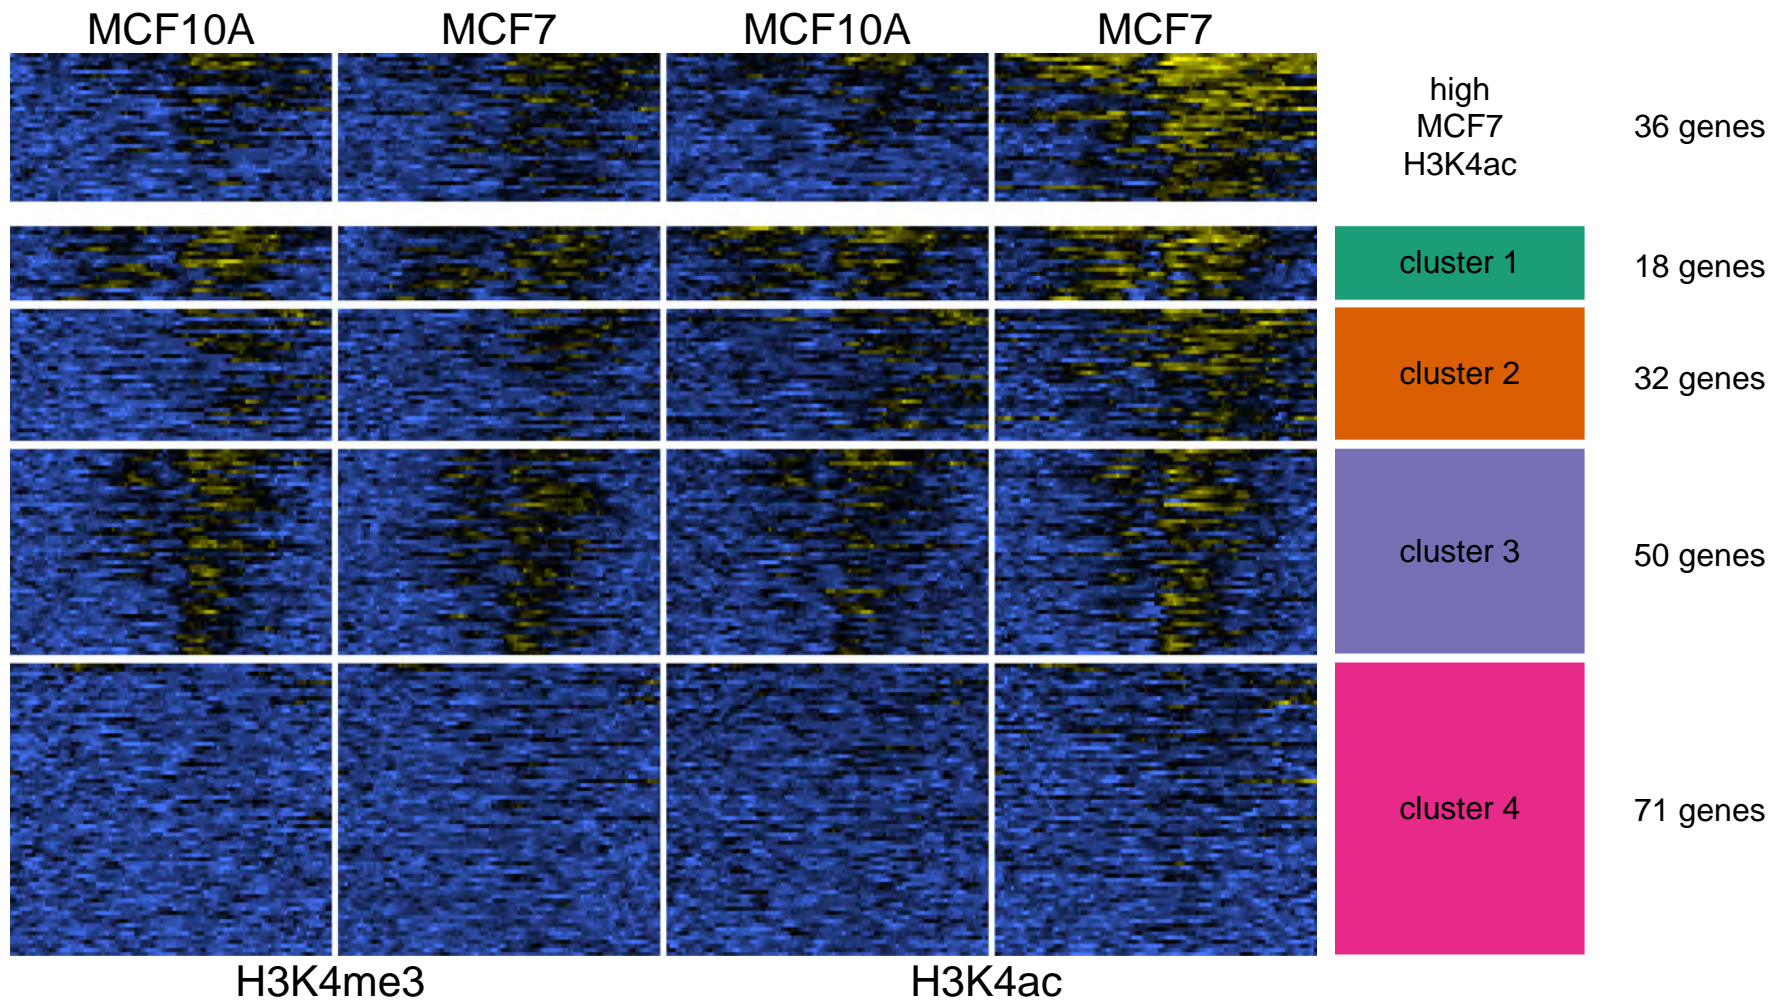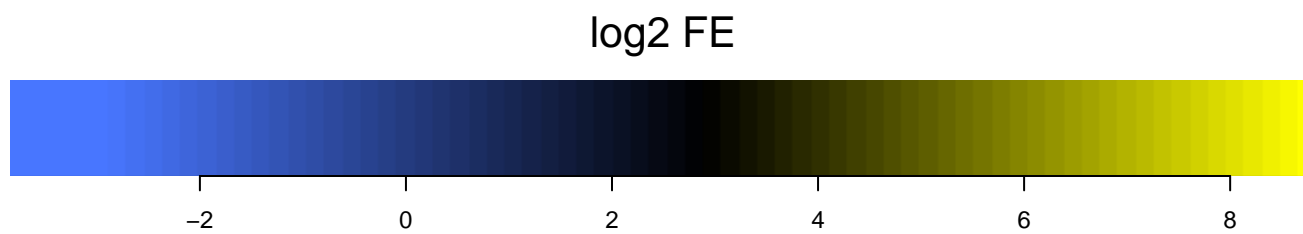

# BHAT\_ESR1\_TARGETS\_VIA\_AKT1\_UP

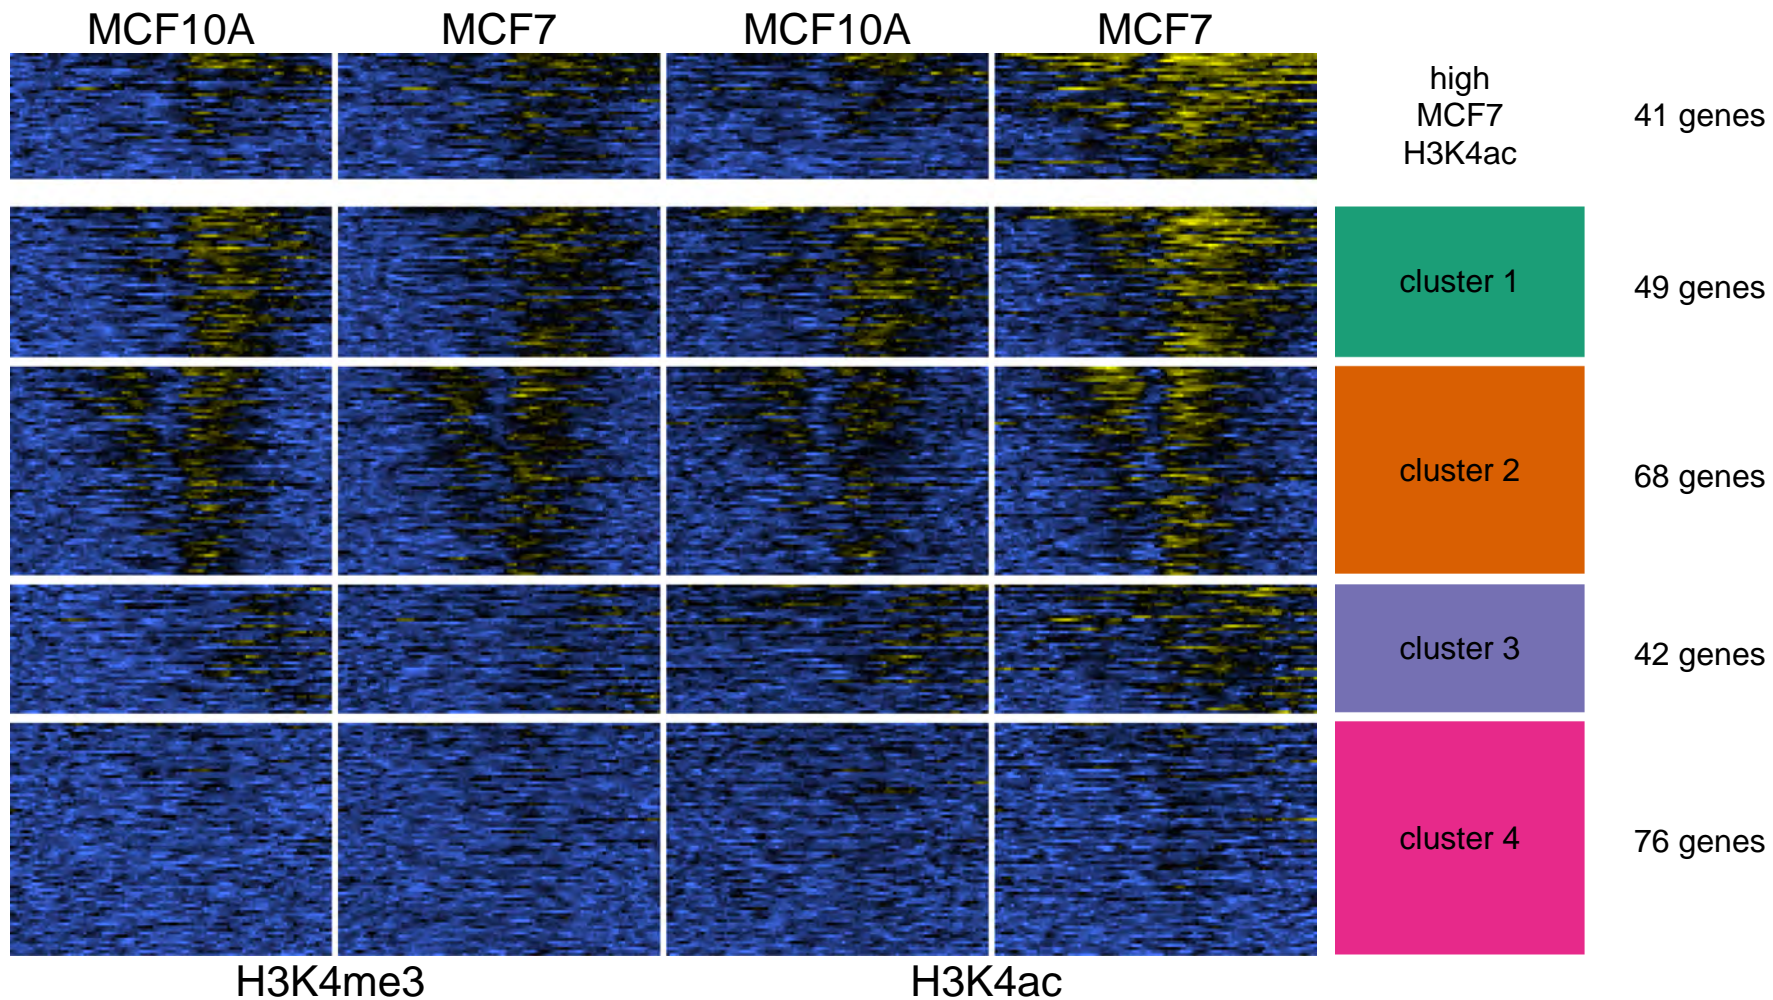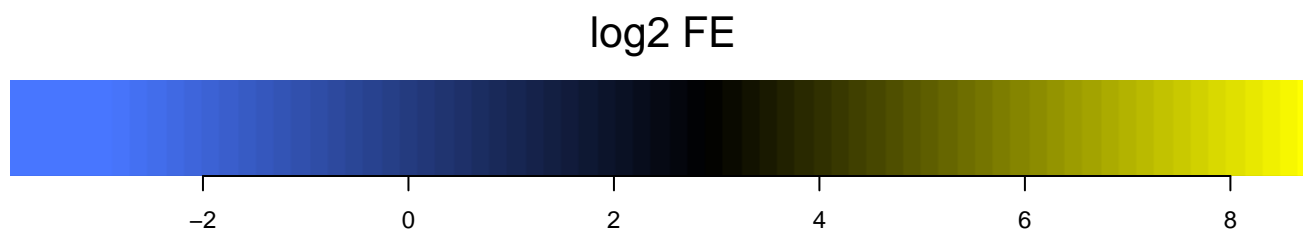

CHARAFE\_BREAST\_CANCER\_LUMINAL\_VS\_BASAL\_UP

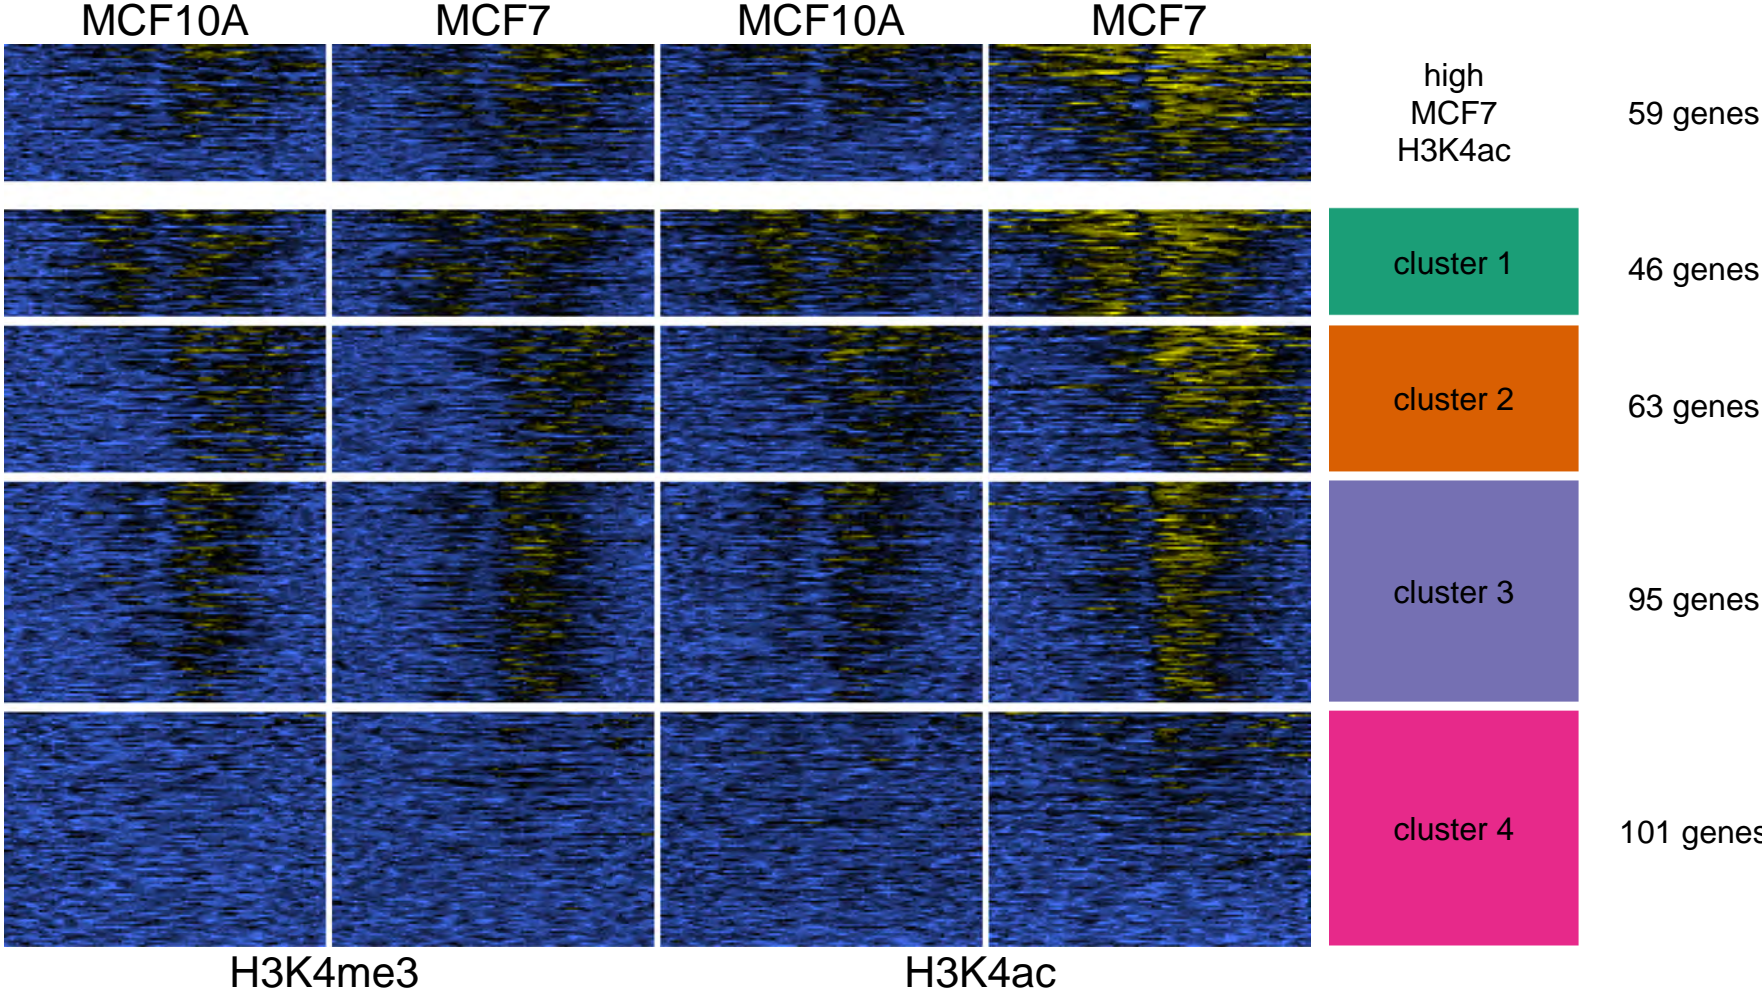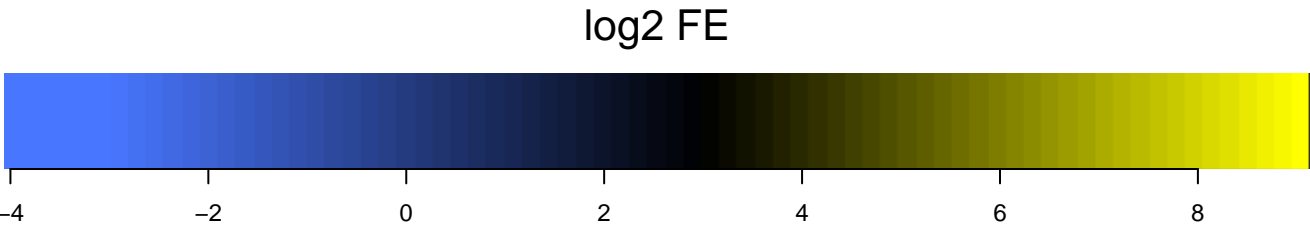



# CHARAFE\_BREAST\_CANCER\_LUMINAL\_VS\_MESENCHYMAL\_UP

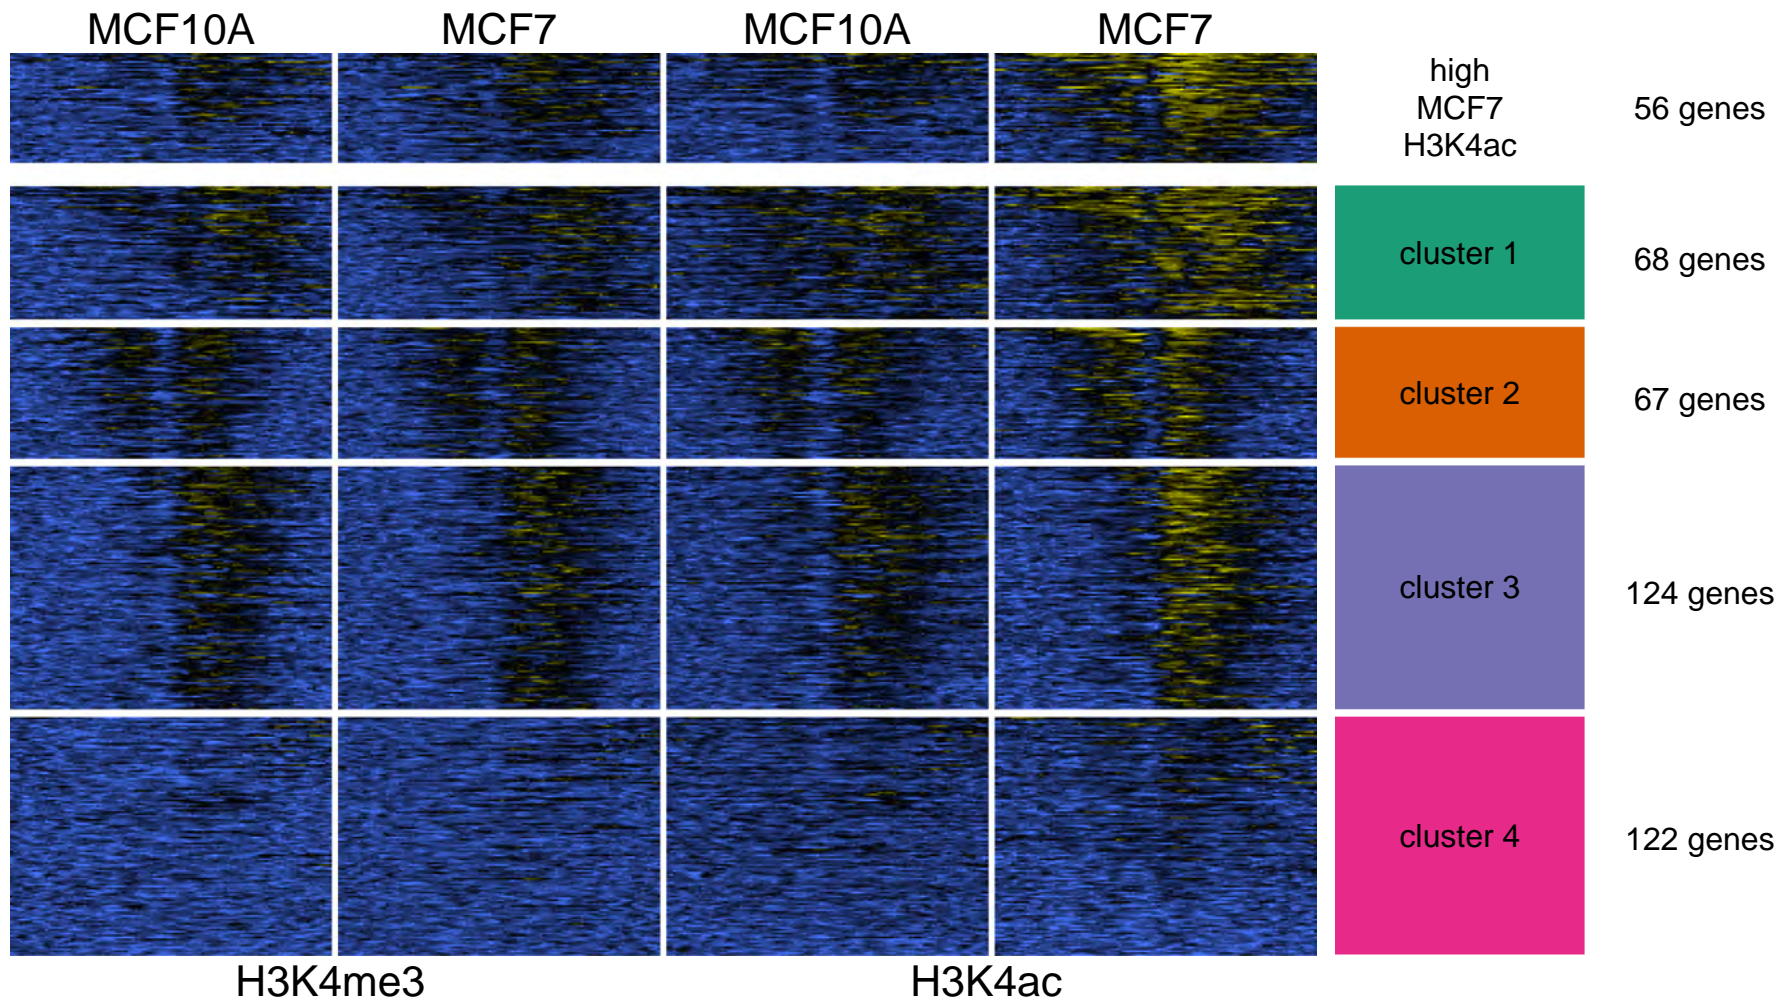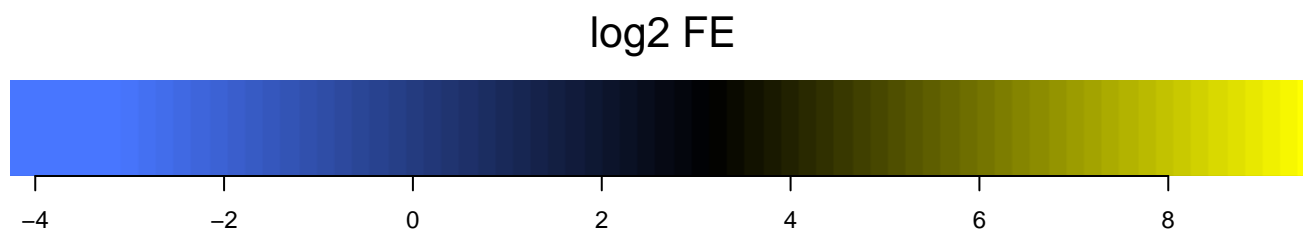

# CREIGHTON\_ENDOCRINE\_THERAPY\_RESISTANCE\_1

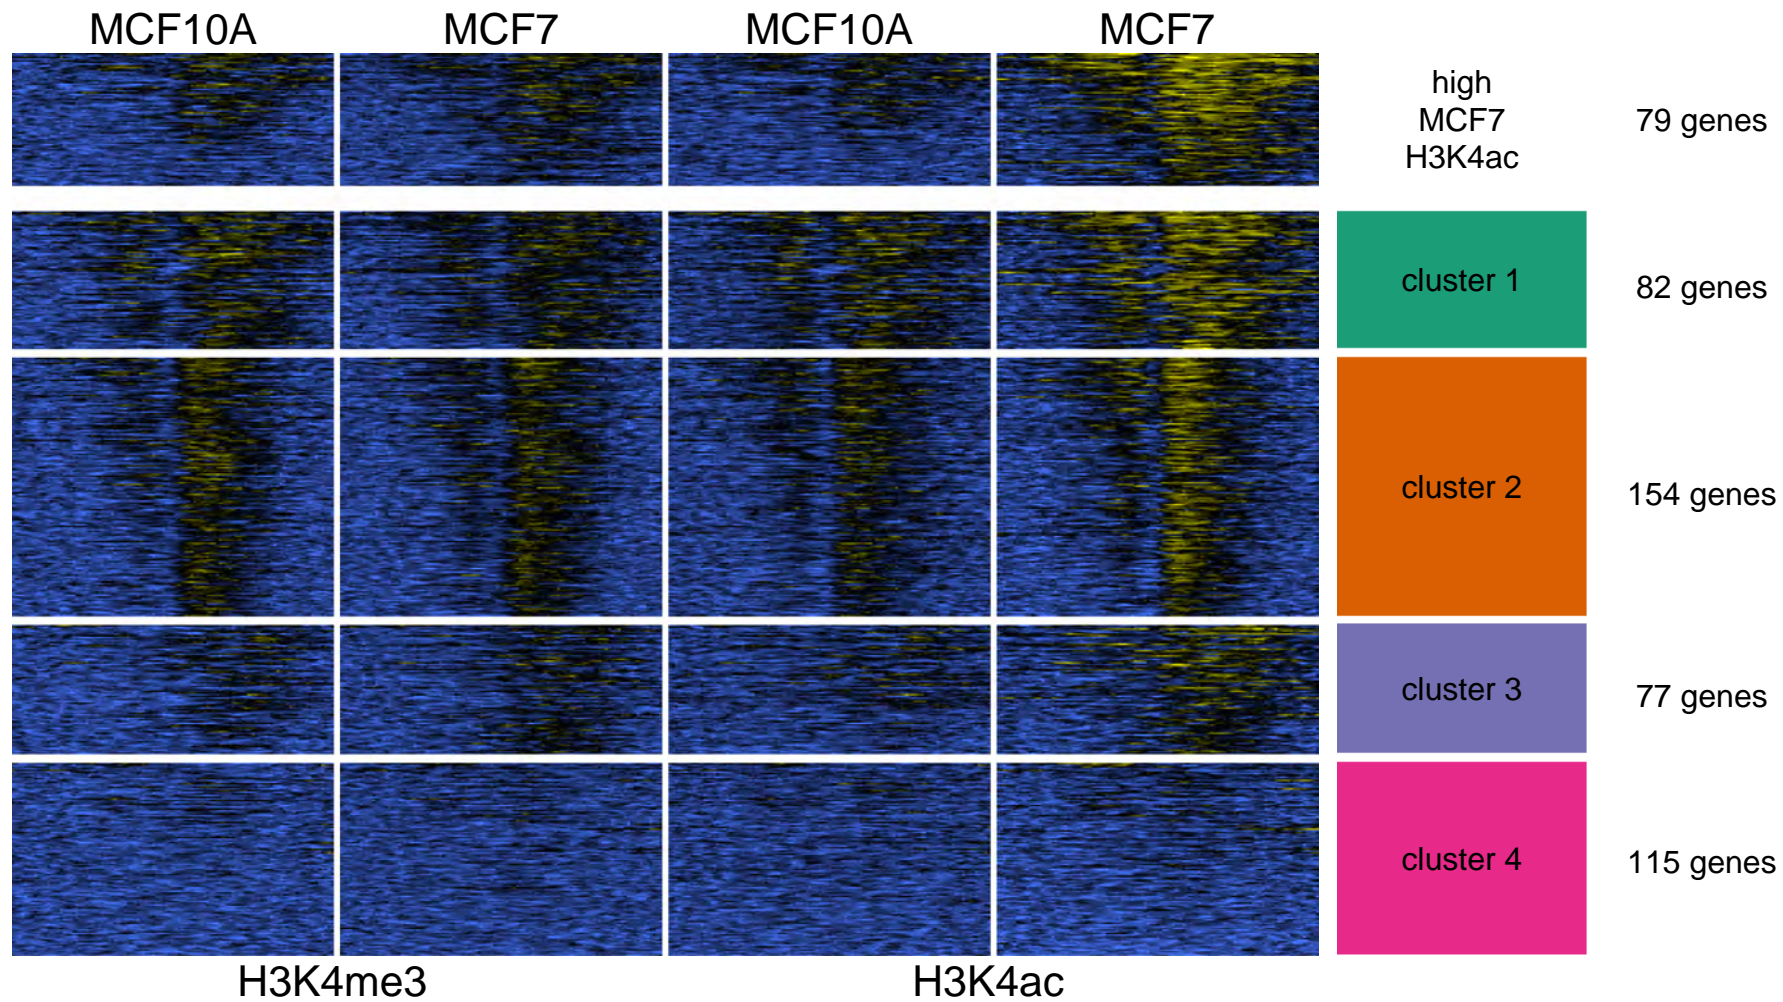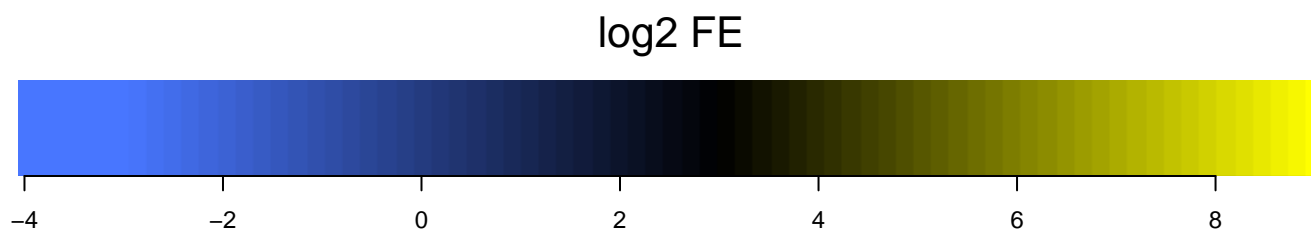

# GOZGIT\_ESR1\_TARGETS\_DN

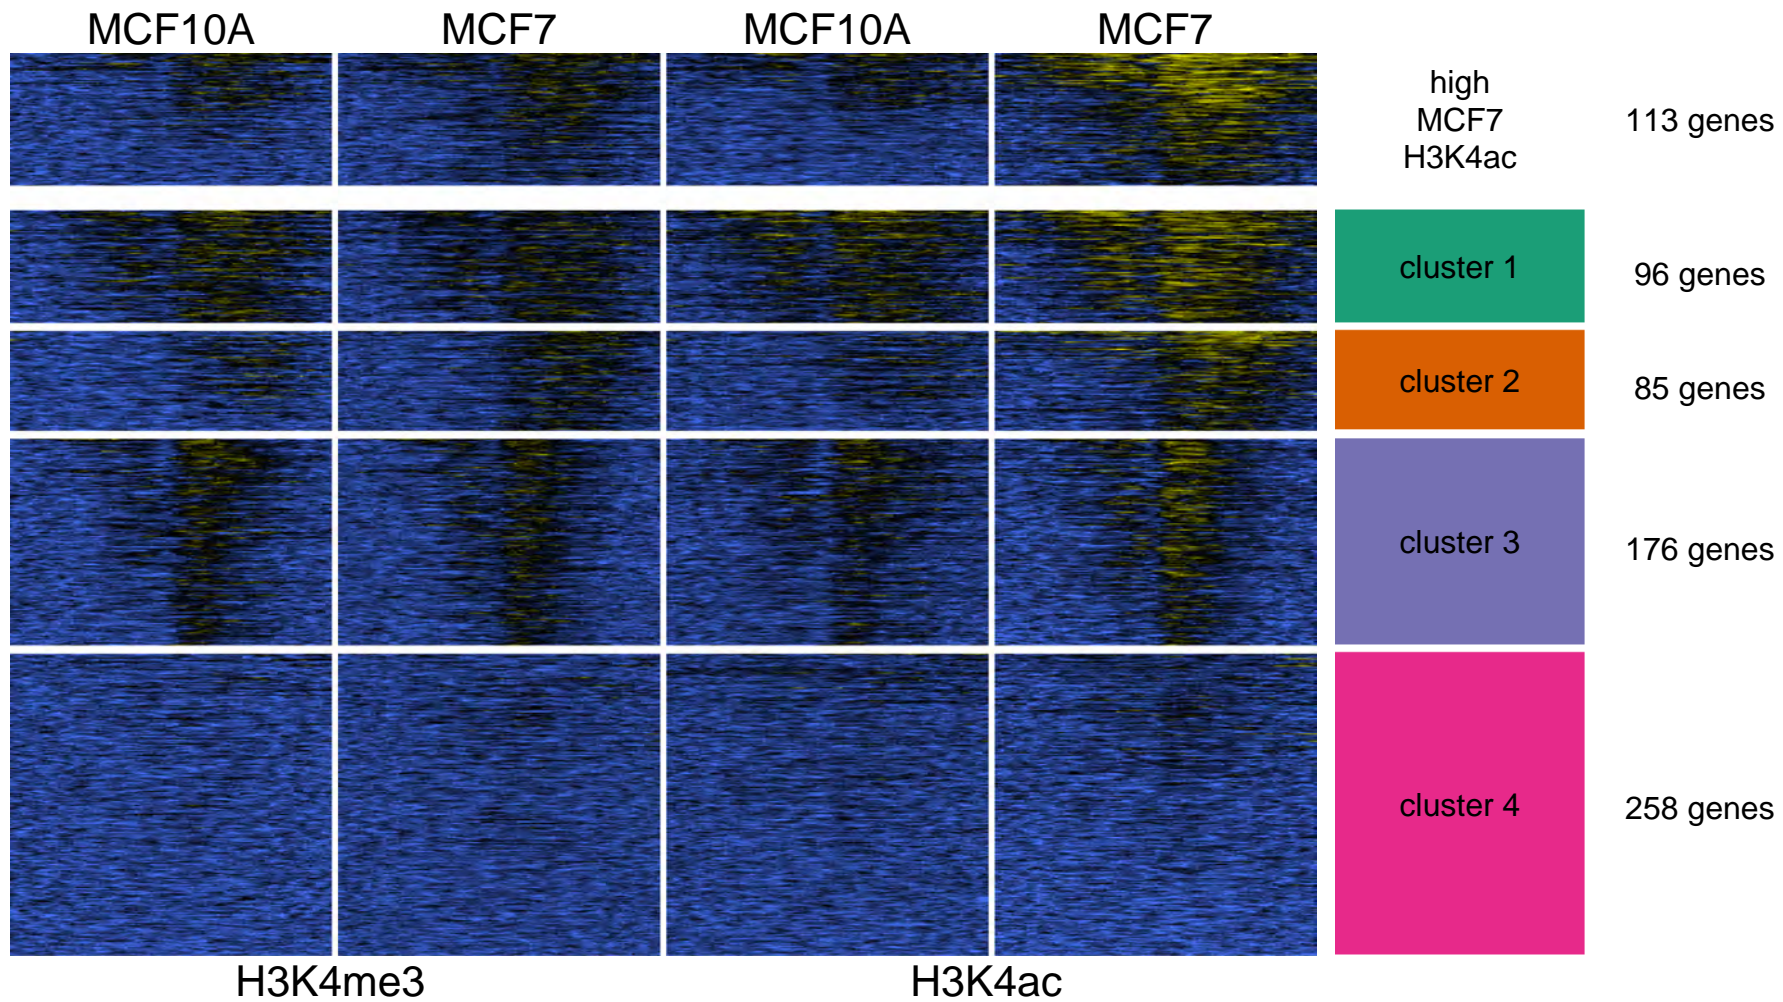

log2 FE

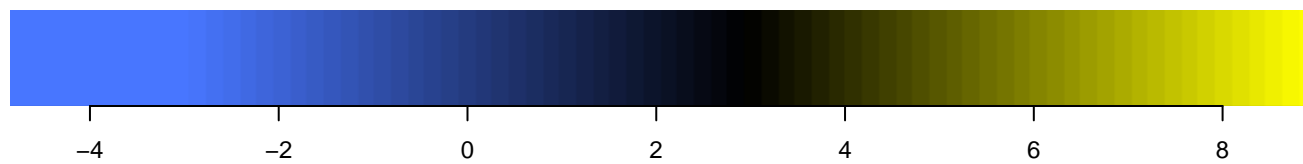

# MASSARWEH\_TAMOXIFEN\_RESISTANCE\_DN

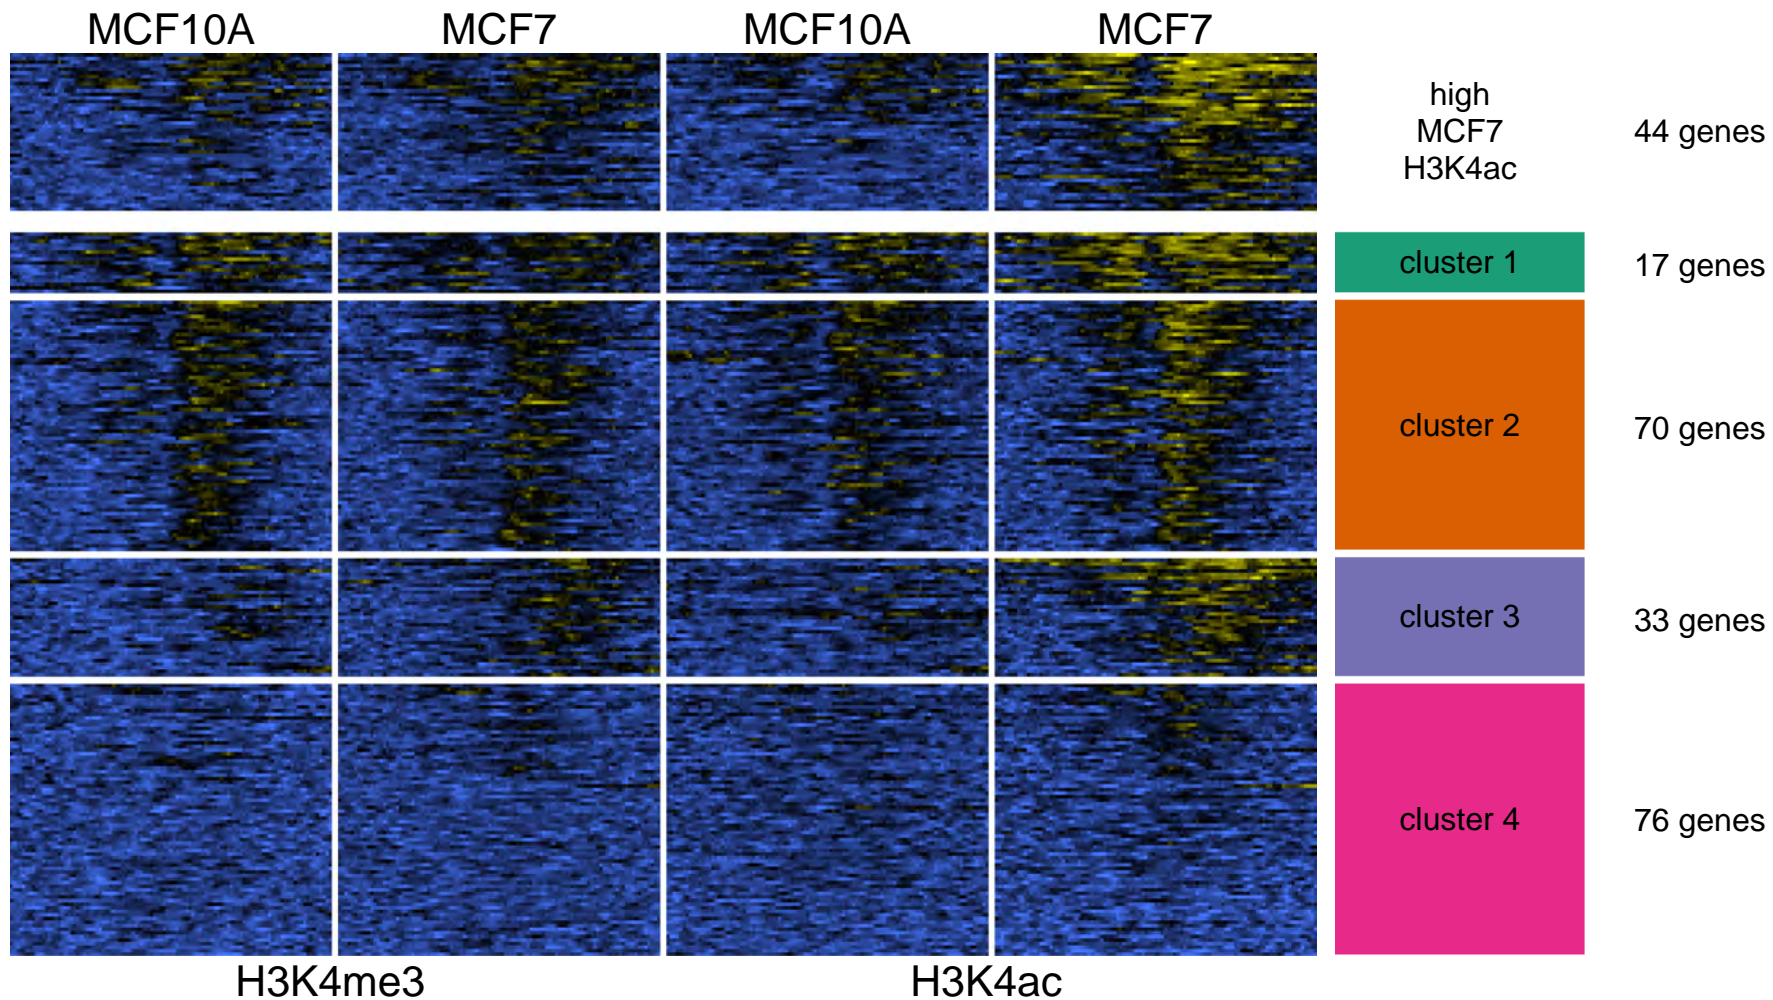

log2 FE

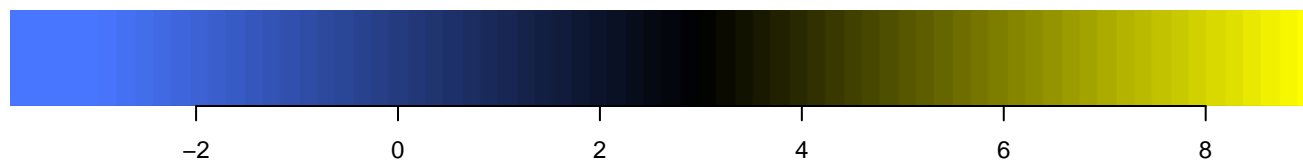

# RAF\_UP.V1\_DN

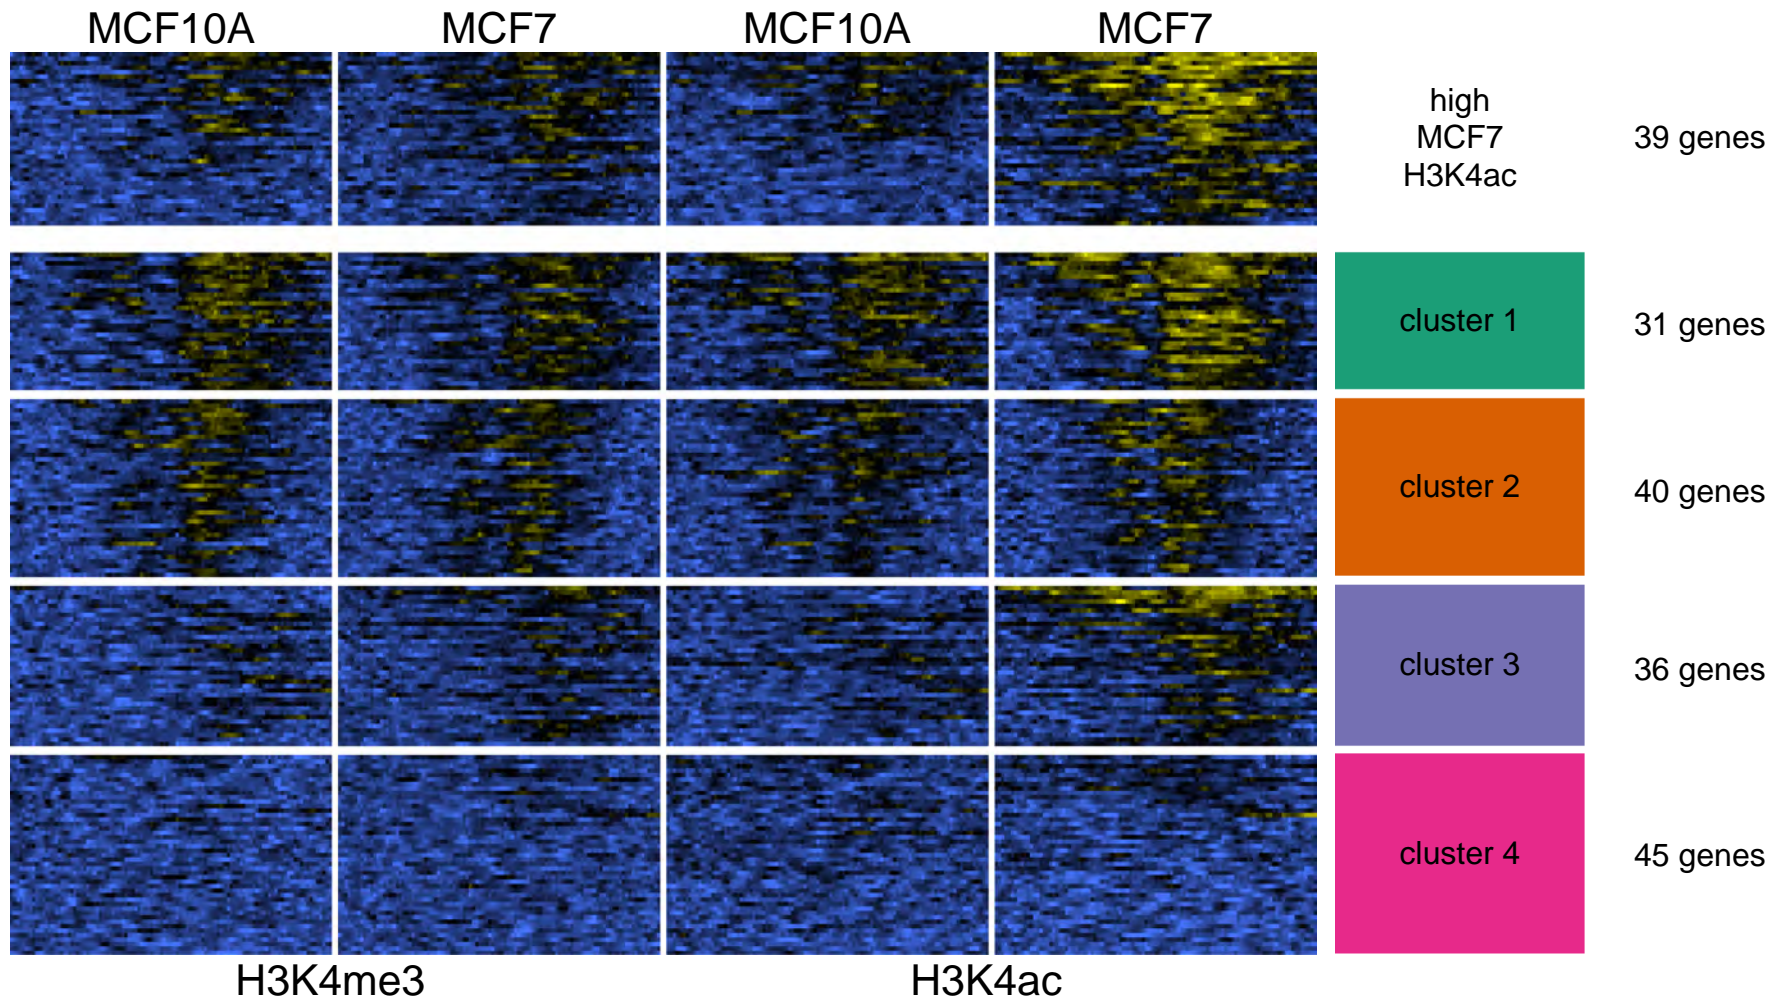

log2 FE

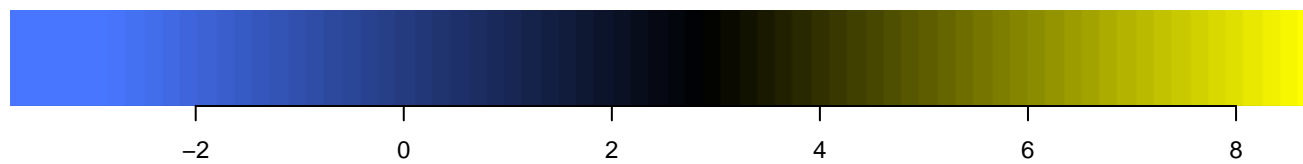

# SMID\_BREAST\_CANCER\_BASAL\_DN

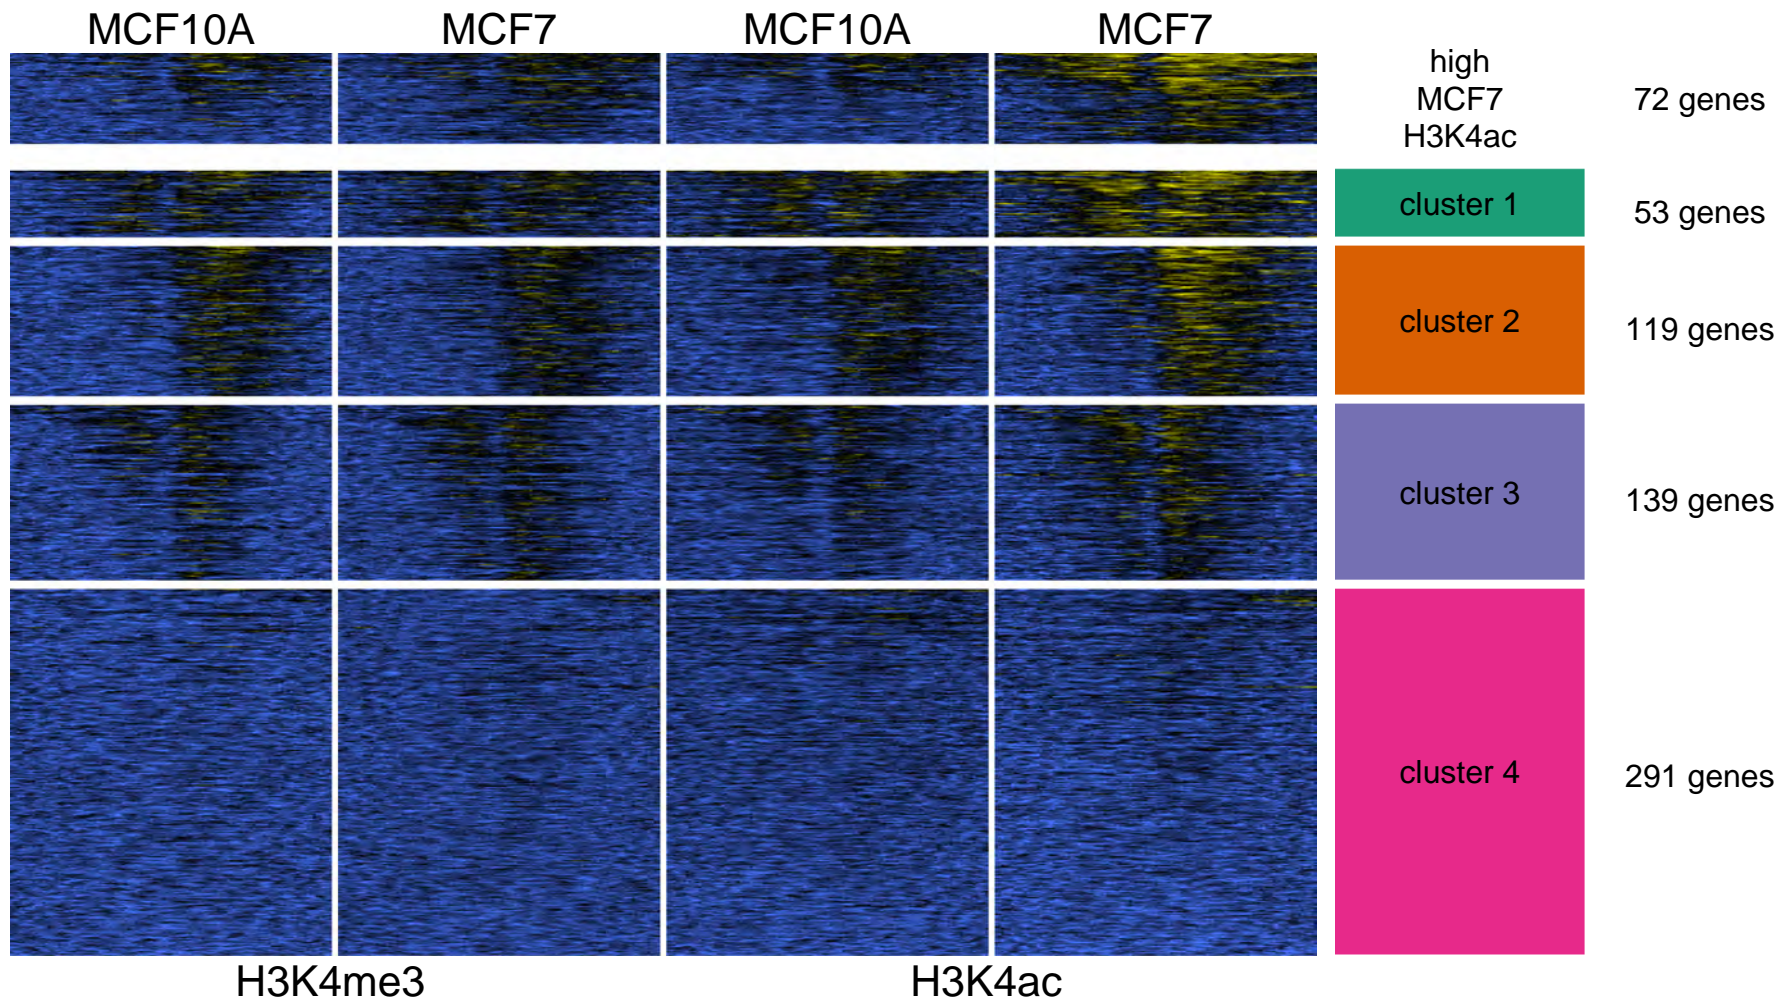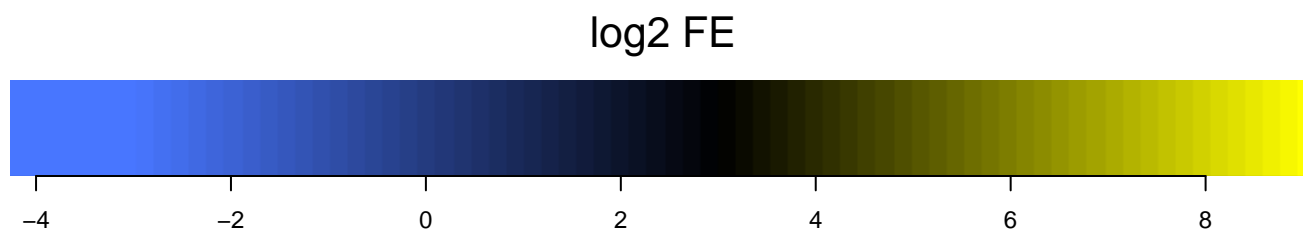

# CHARAFE\_BREAST\_CANCER\_BASAL\_VS\_MESENCHYMAL\_UP

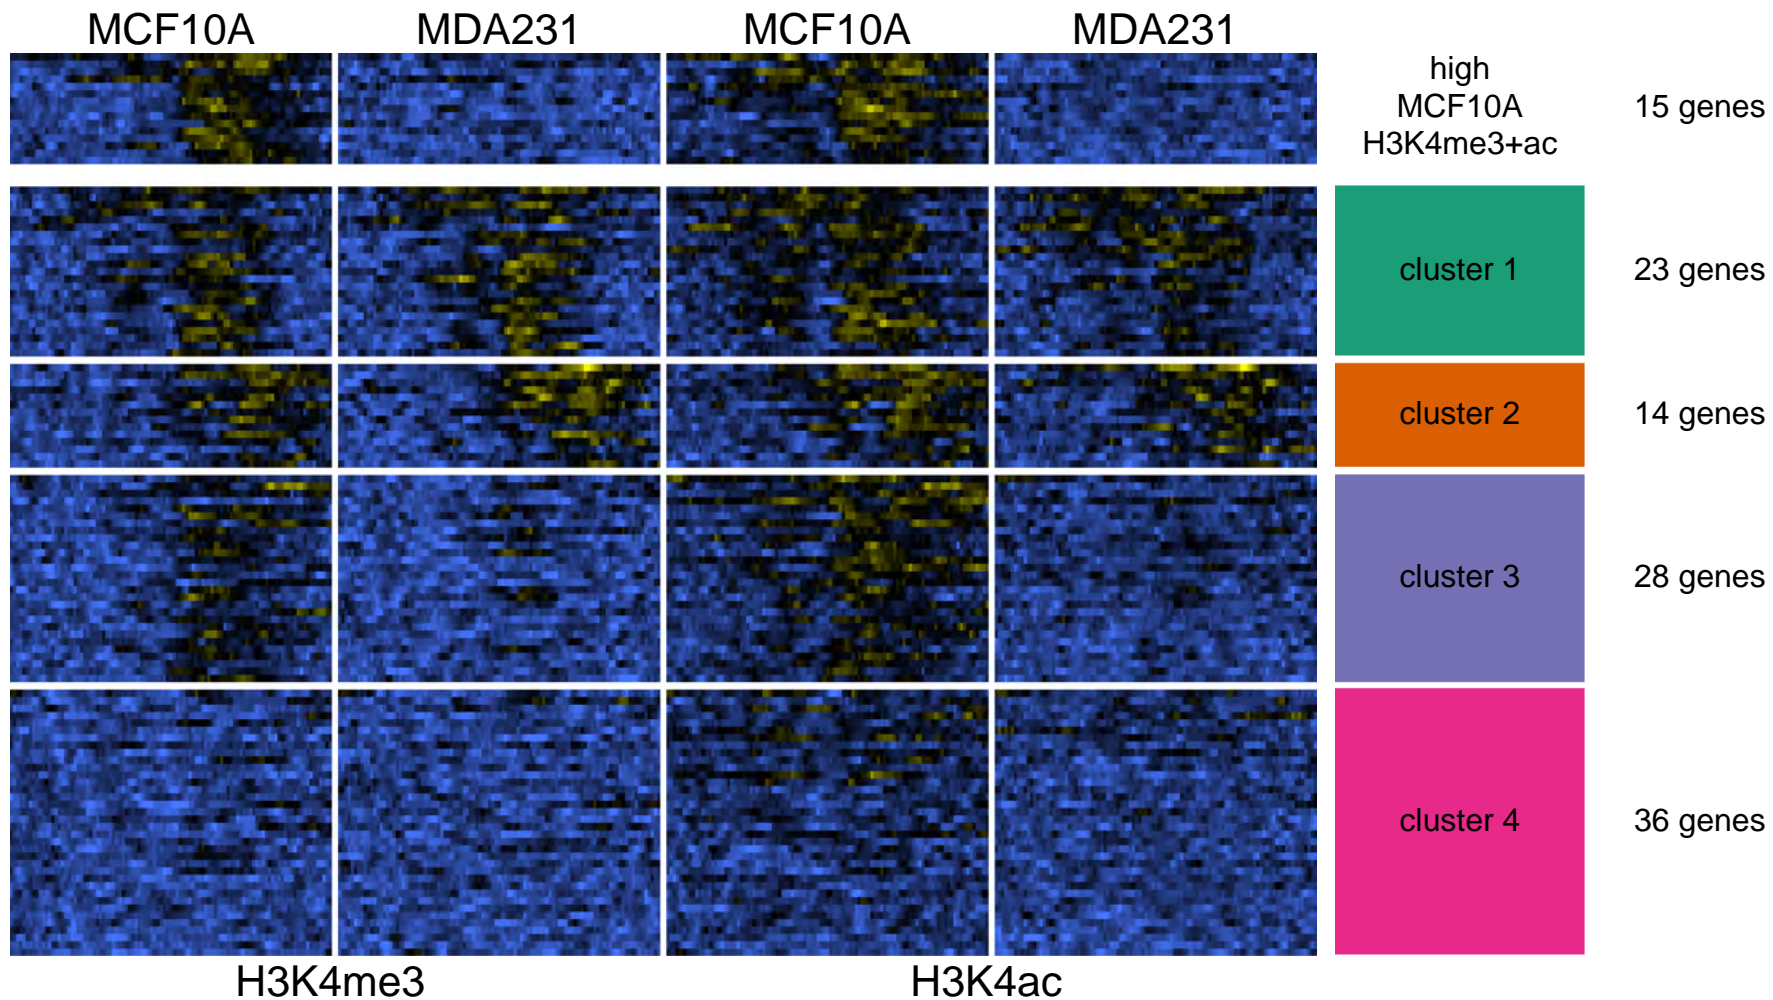

log2 FE

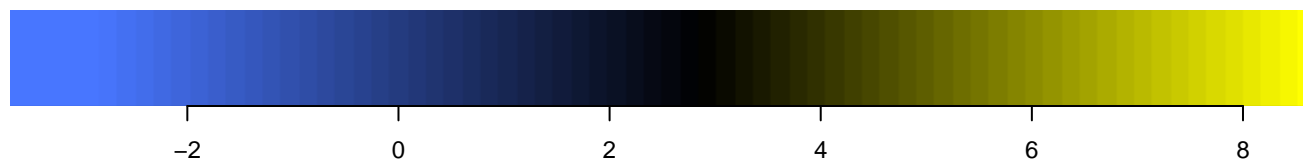

# CHARAFE\_BREAST\_CANCER\_BASAL\_VS\_MESENCHYMAL\_UP

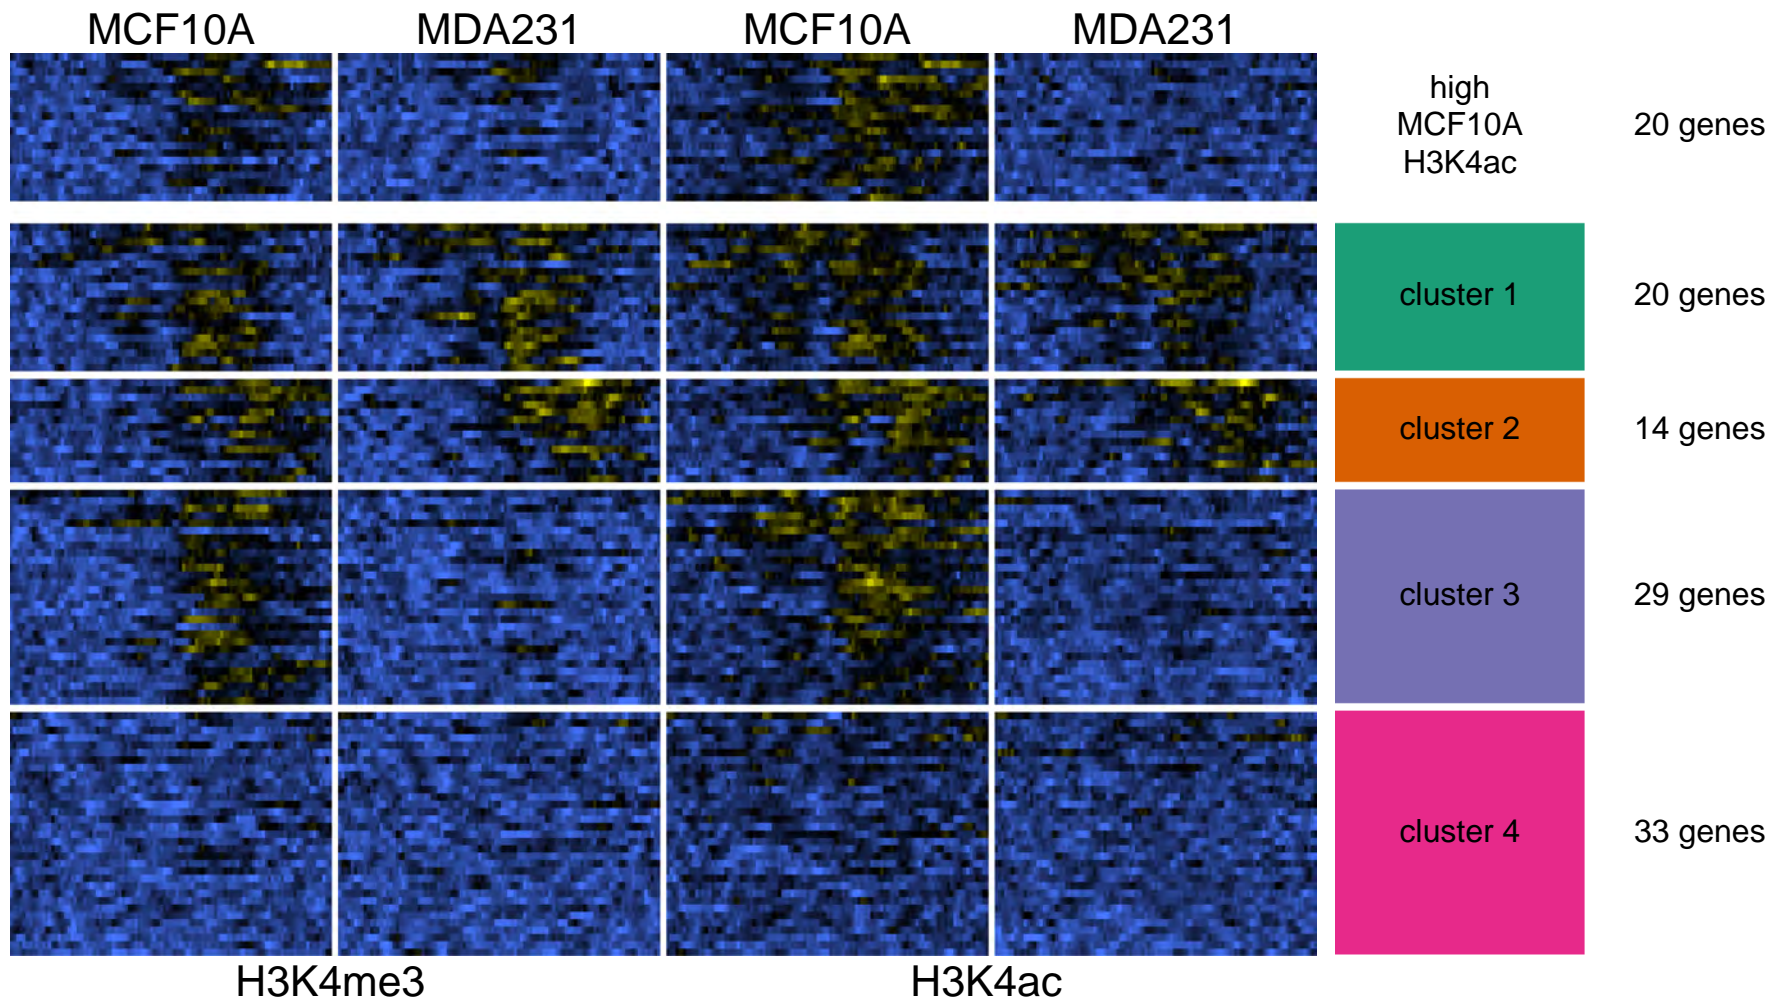

log<sub>2</sub> FE





# CHARAFE\_BREAST\_CANCER\_LUMINAL\_VS\_MESENCHYMAL\_UP

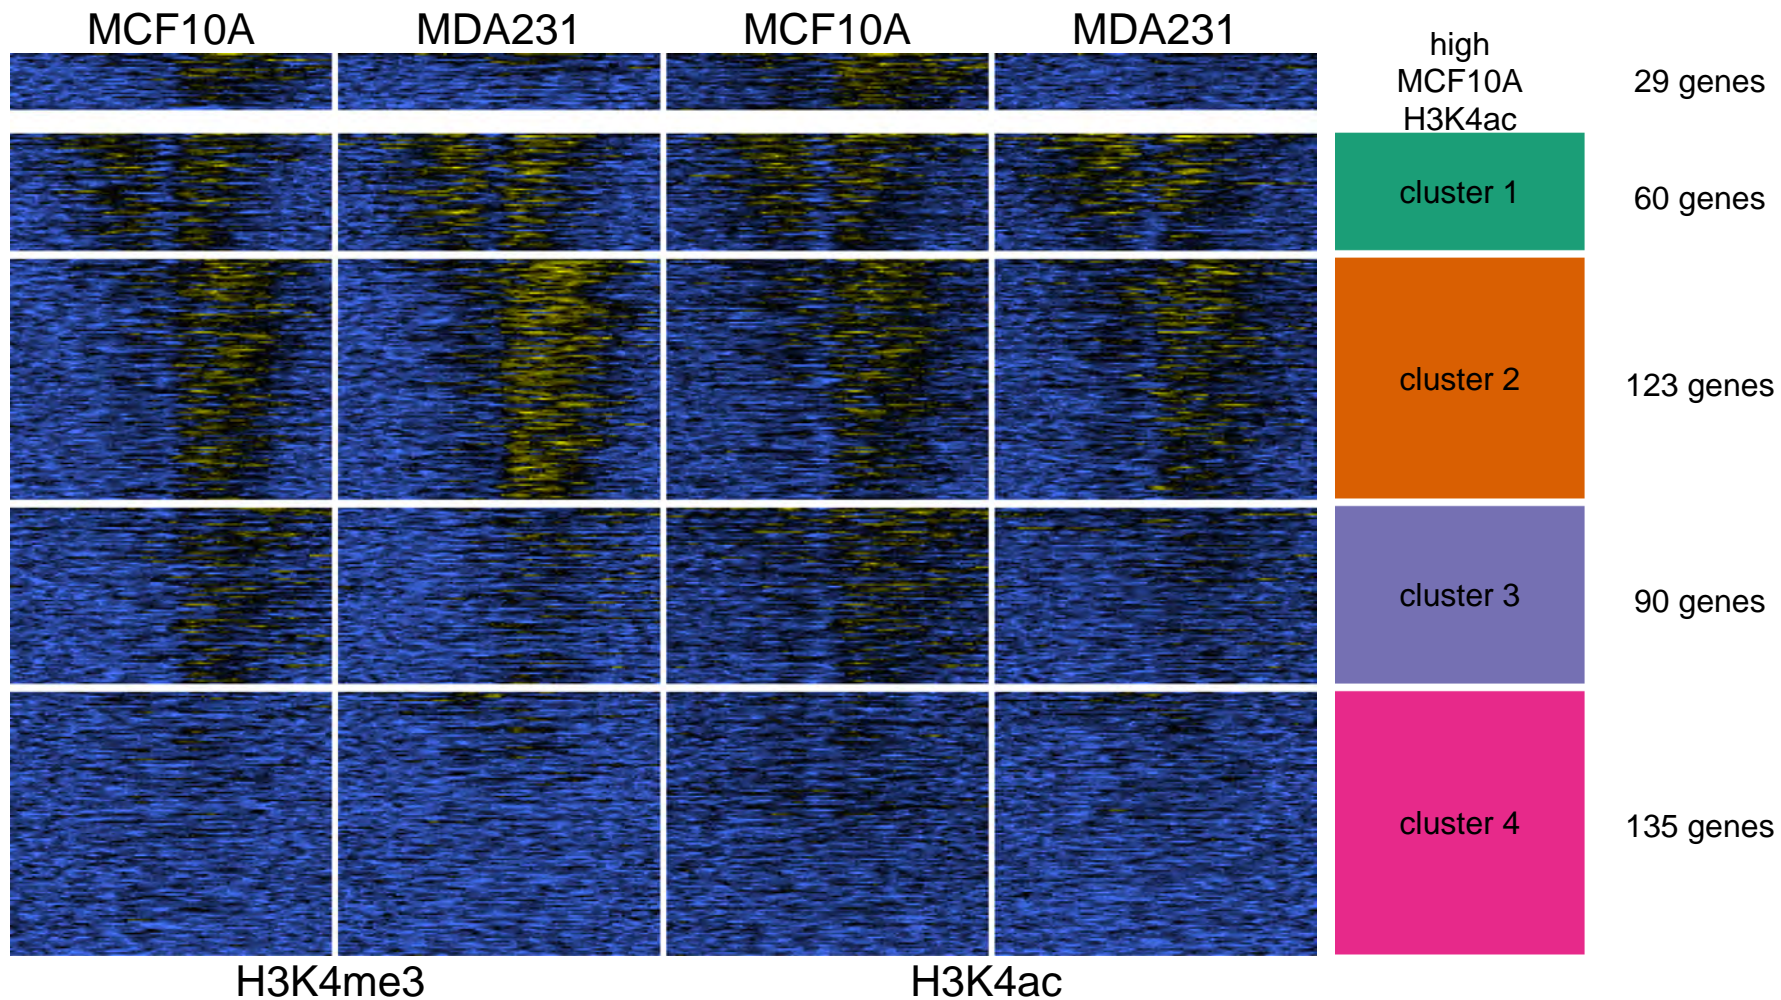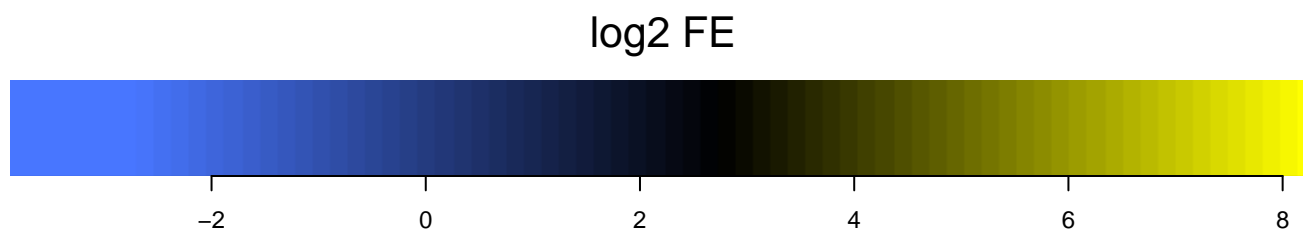

# COLDREN\_GEFITINIB\_RESISTANCE\_DN

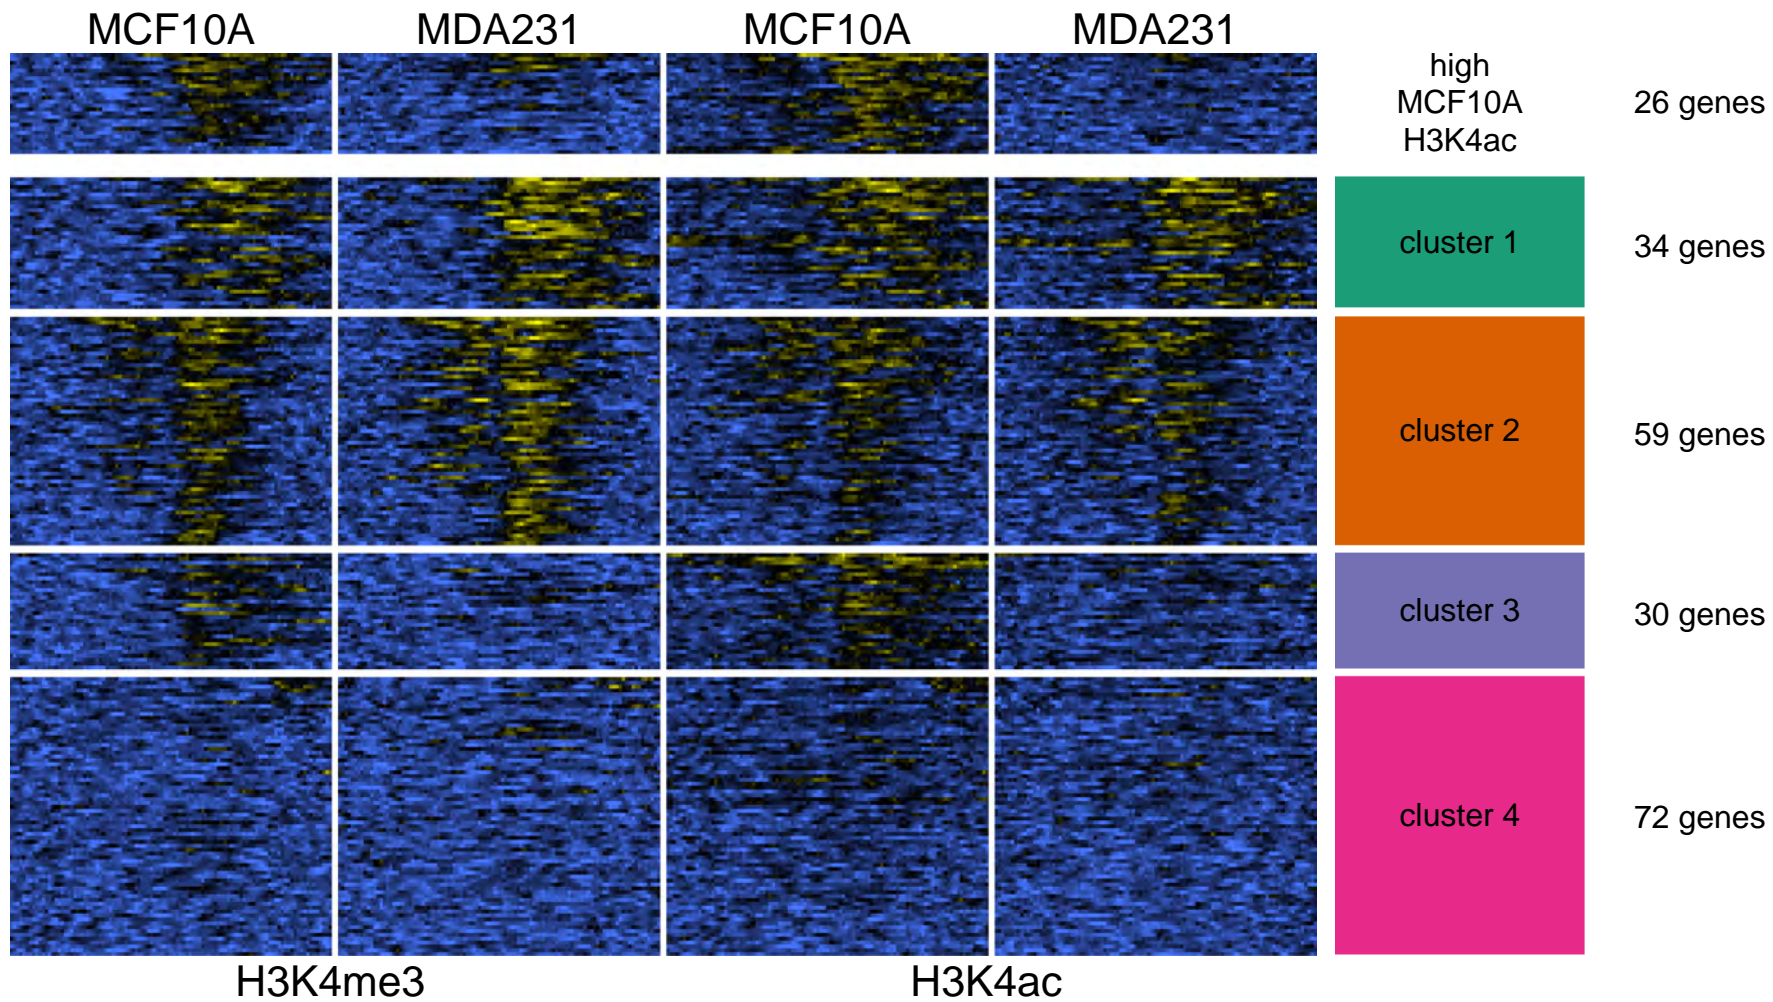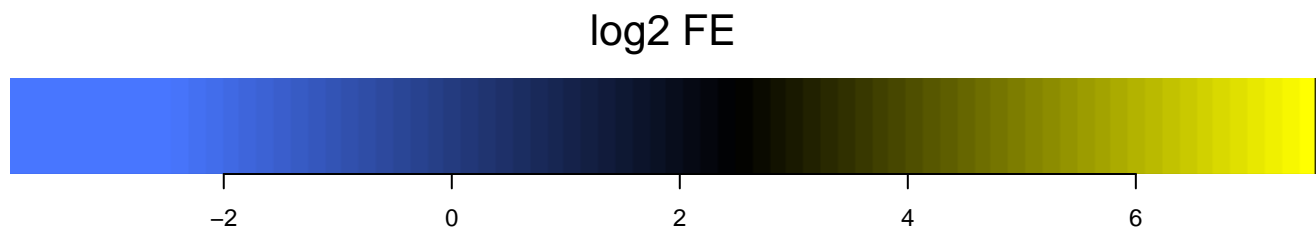

# JAEGER\_METASTASIS\_DN

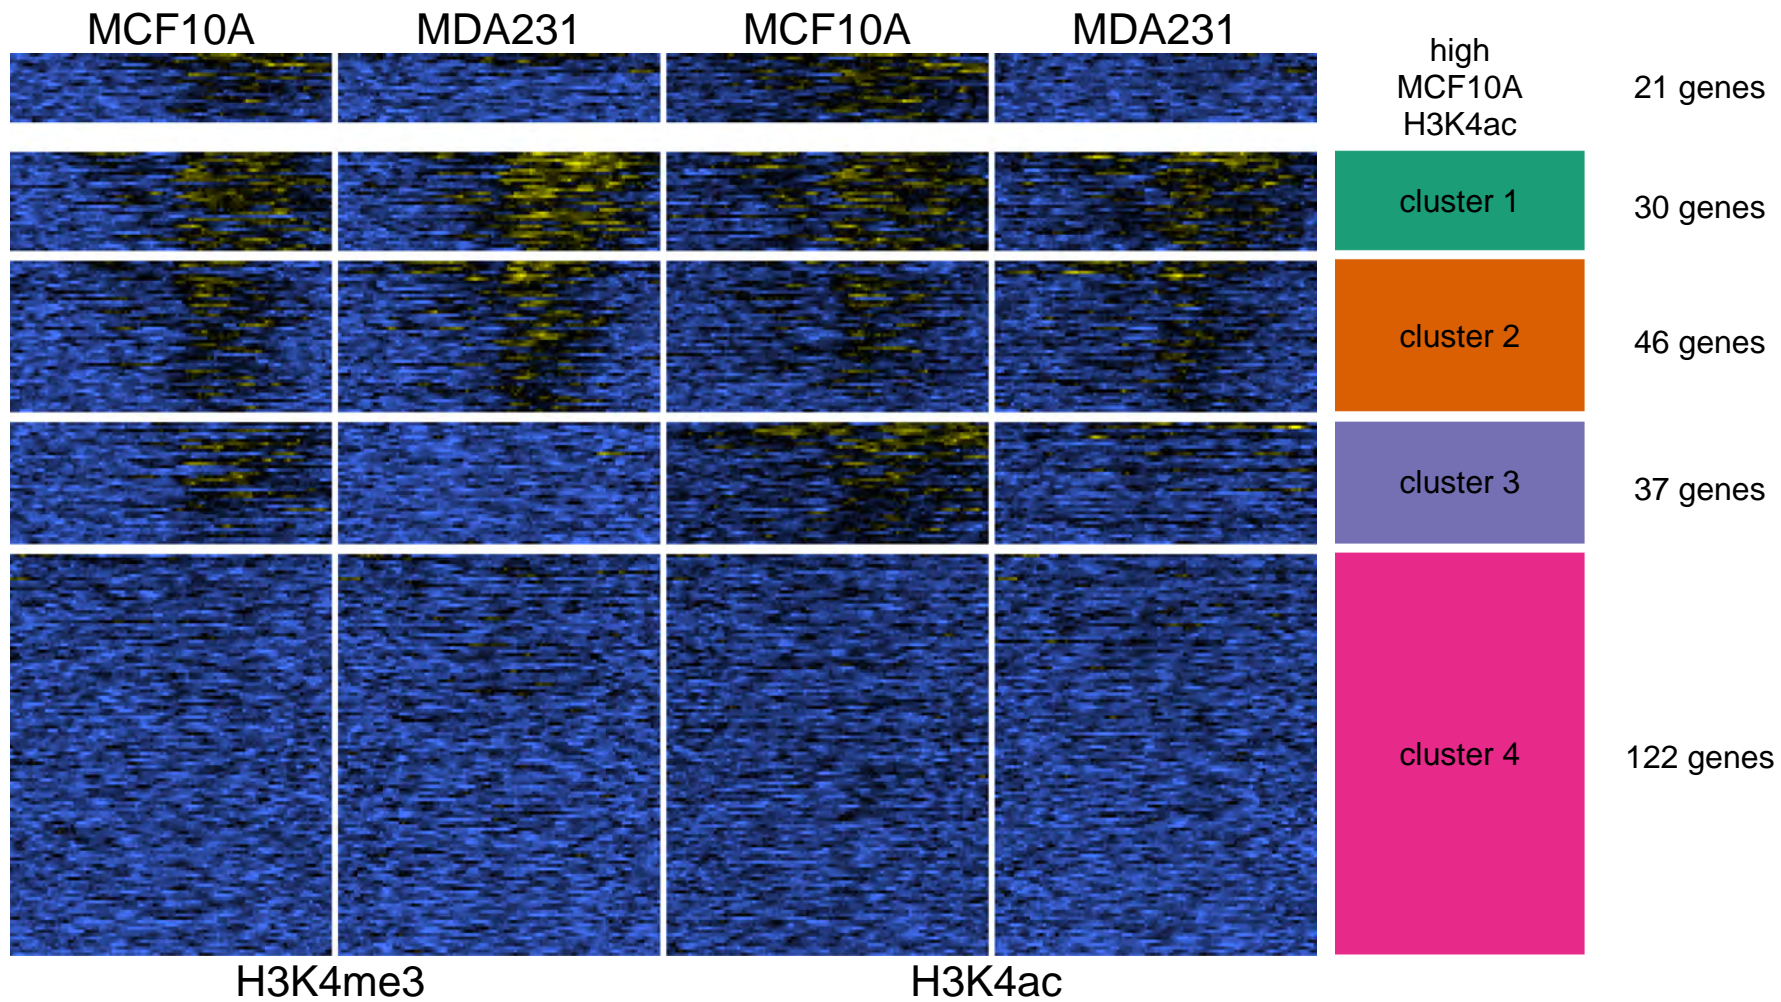

H3K4me3

H3K4ac

log2 FE

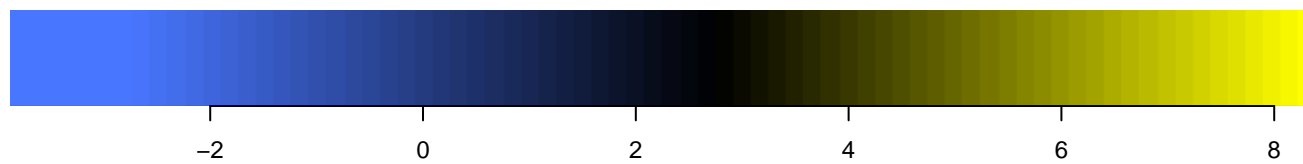

# ONDER\_CDH1\_TARGETS\_2\_DN

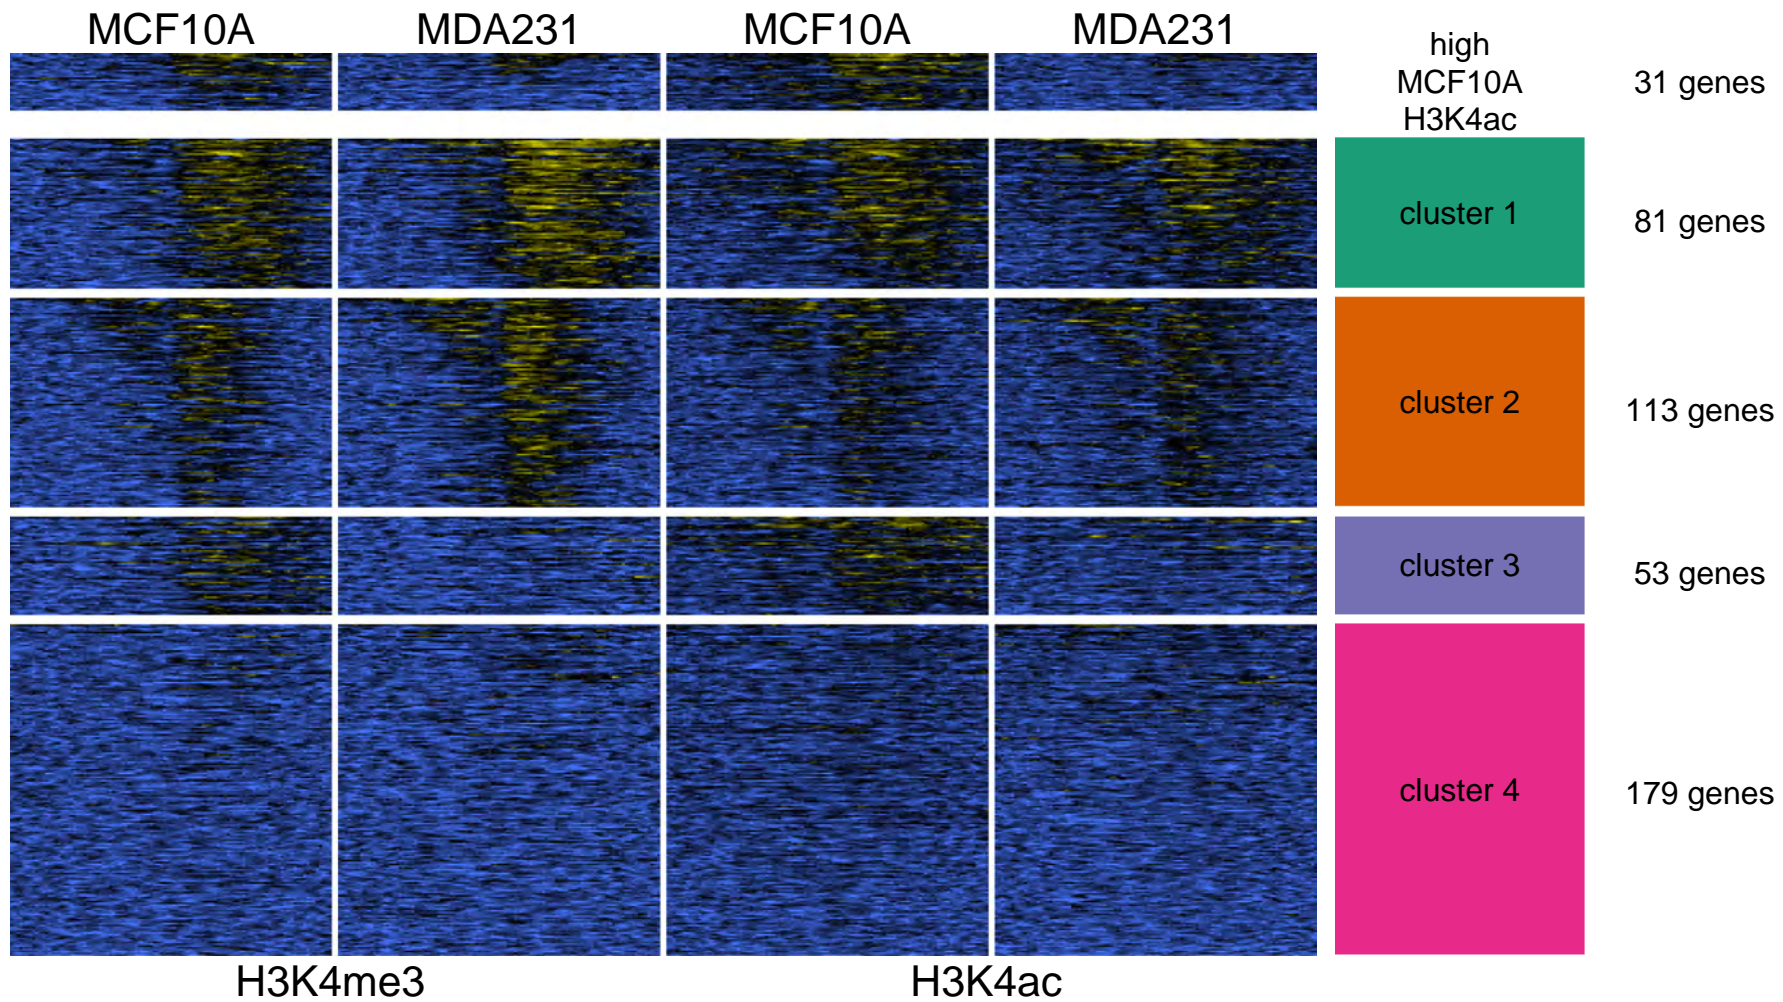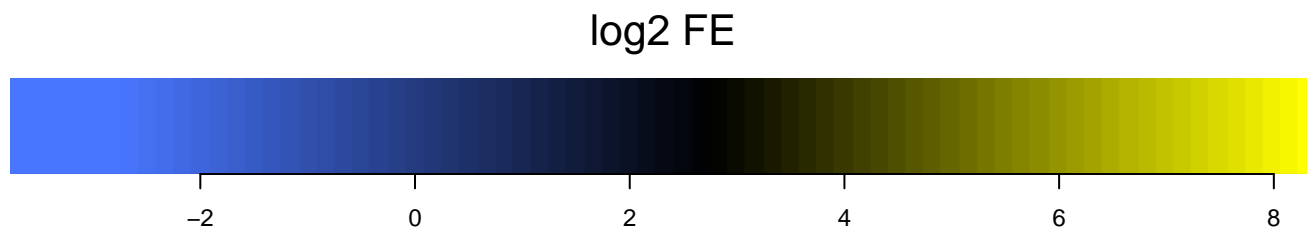

# CHARAFE\_BREAST\_CANCER\_LUMINAL\_VS\_MESENCHYMAL\_DN

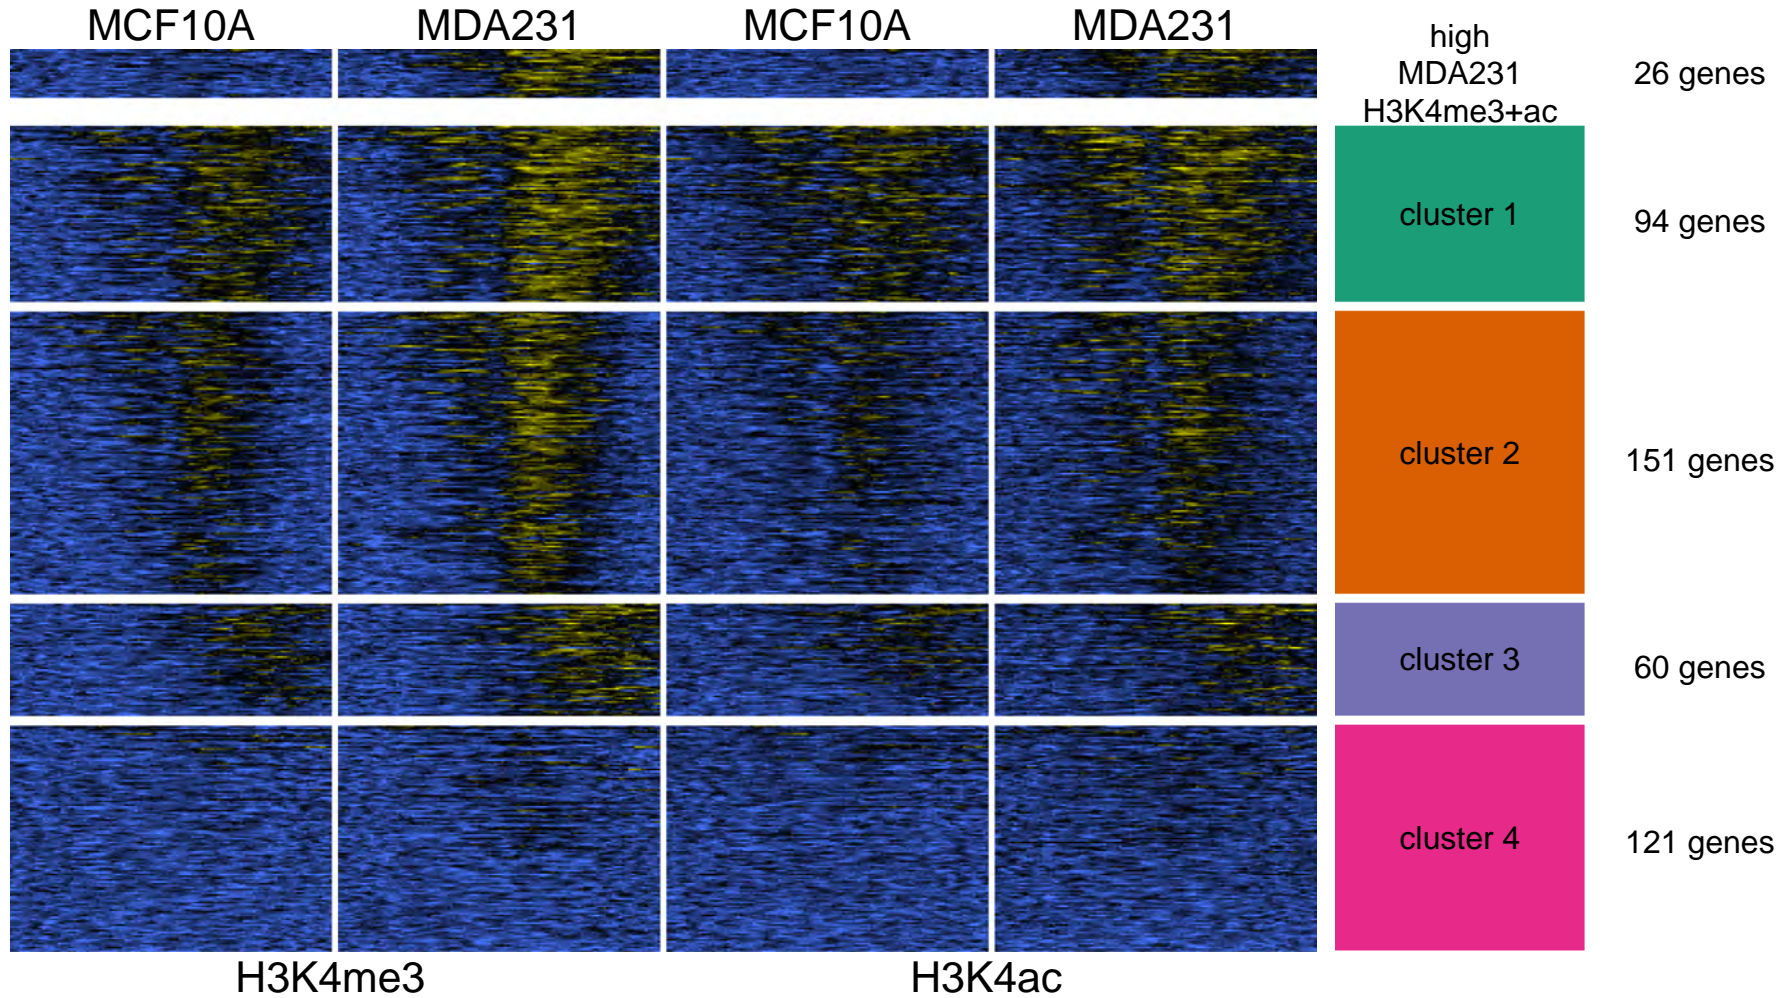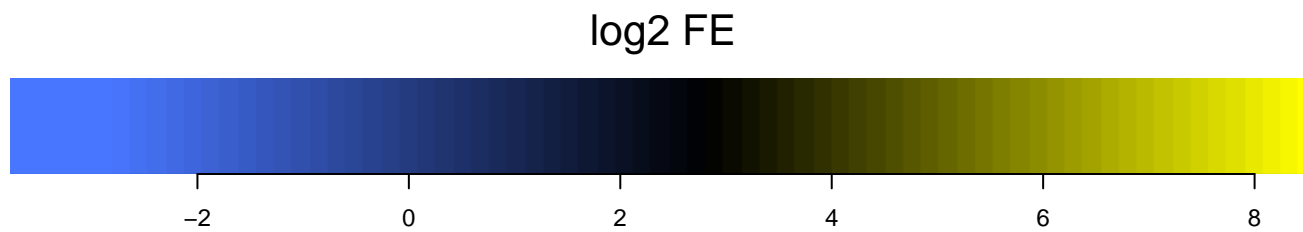

# CHANG\_CYCLING\_GENES

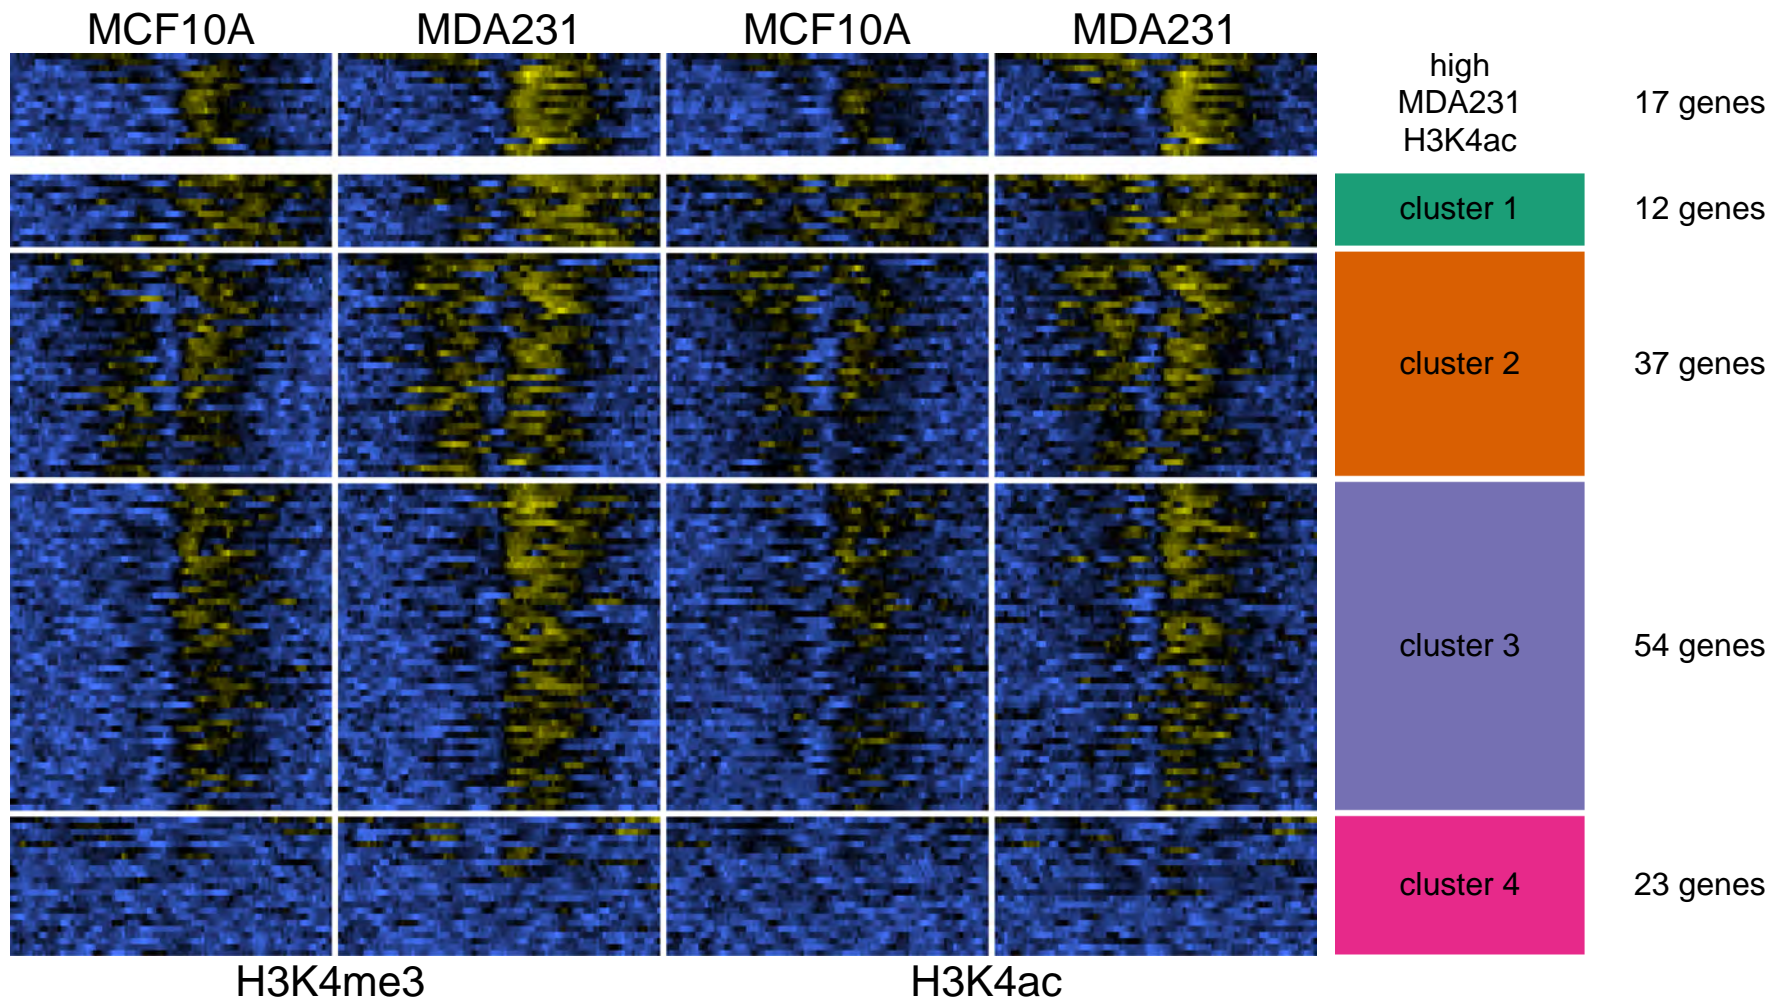

log2 FE

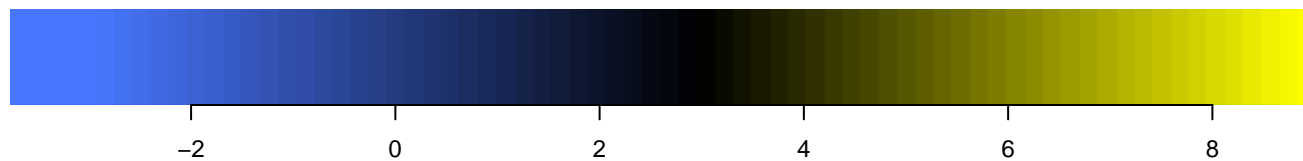

# CHARAFE\_BREAST\_CANCER\_LUMINAL\_VS\_MESENCHYMAL\_DN

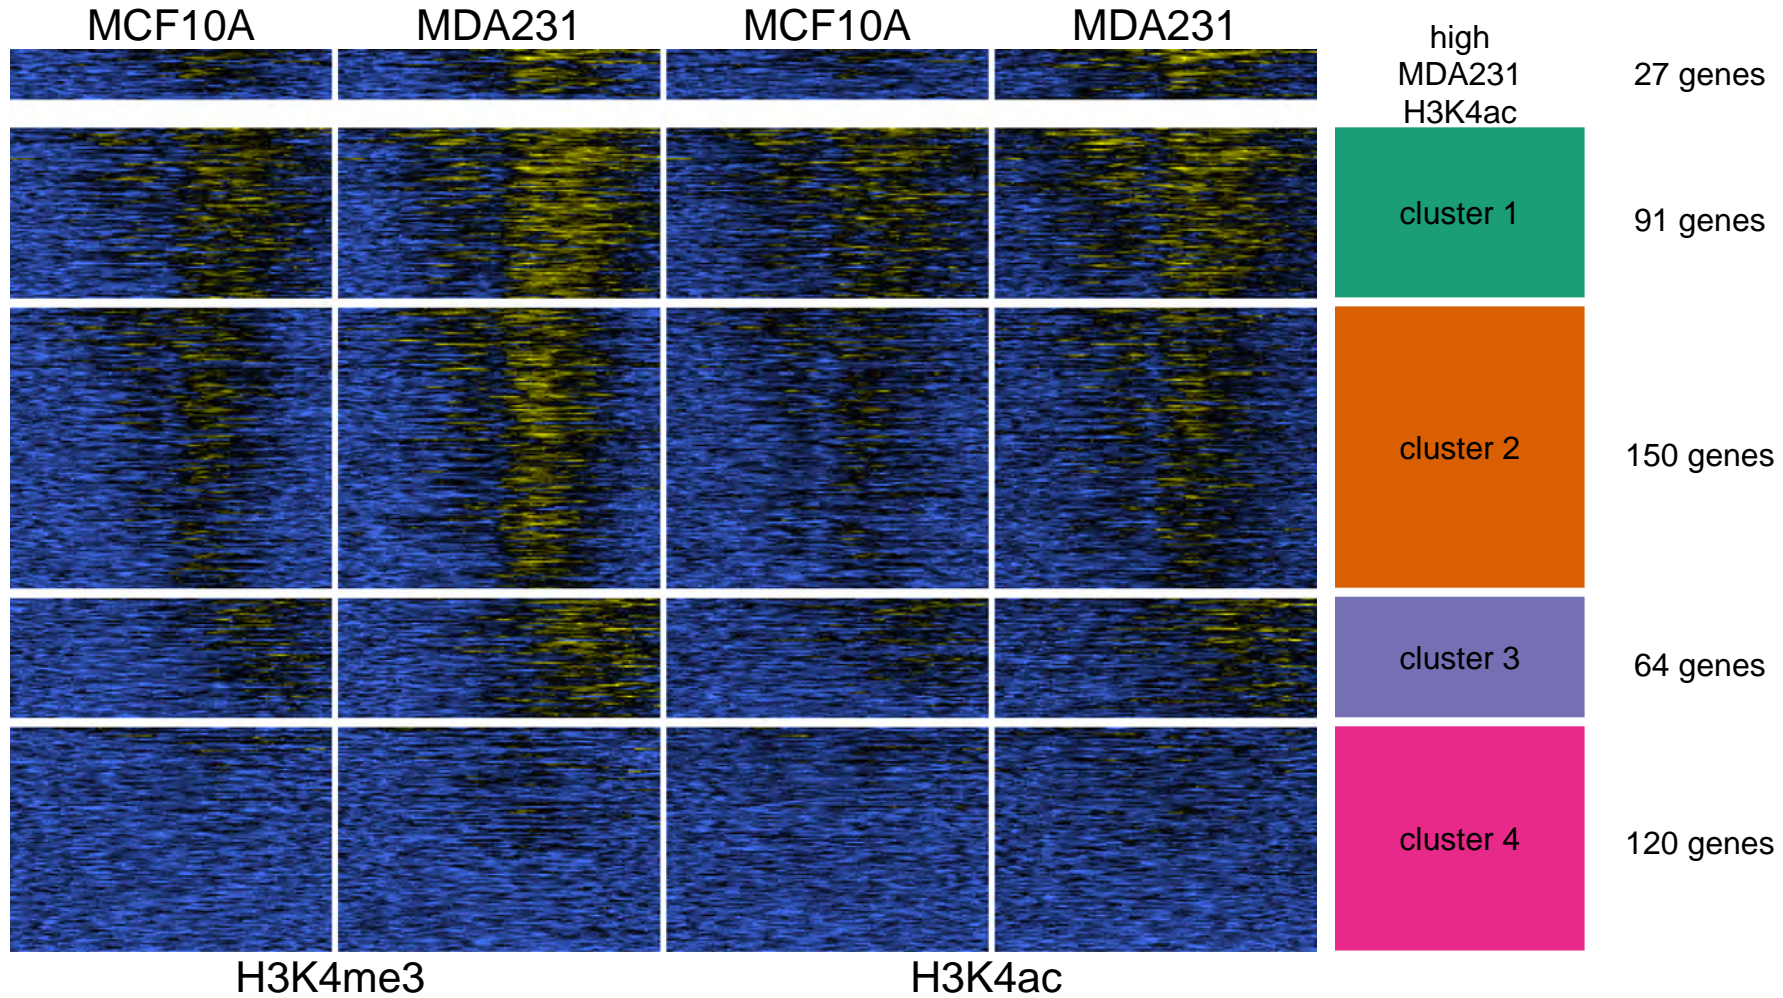

# CHIANG\_LIVER\_CANCER\_SUBCLASS\_PROLIFERATION\_UP

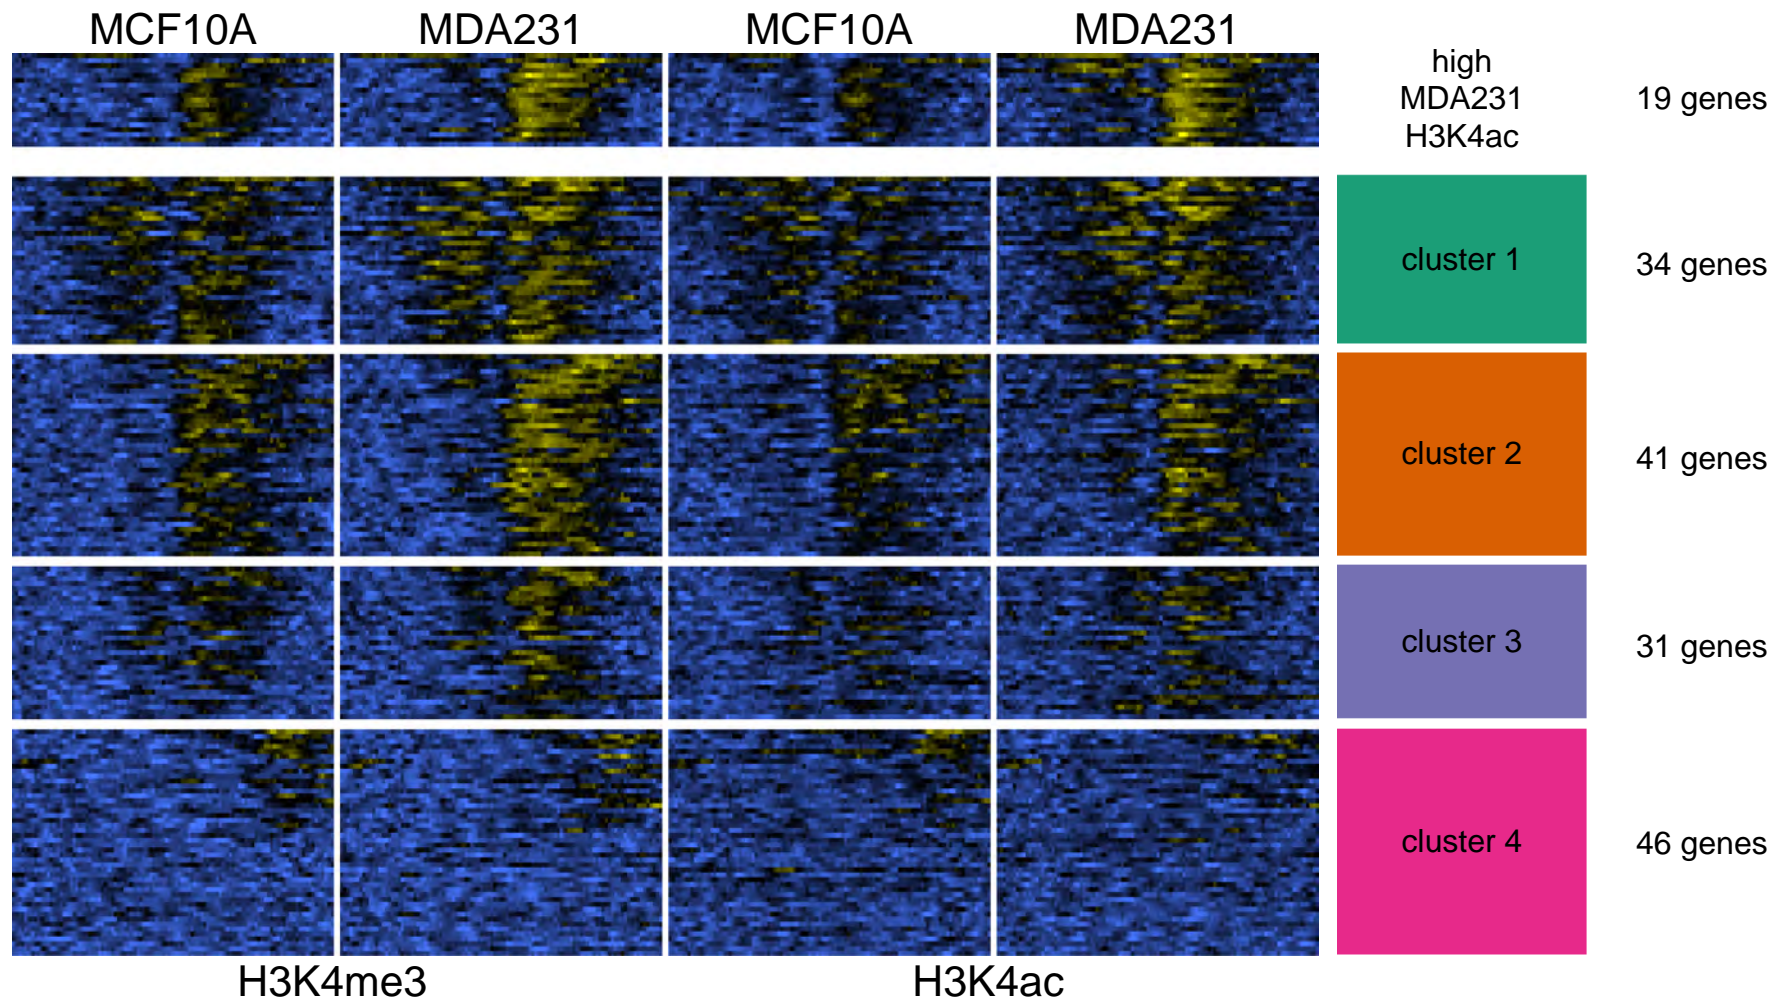

log2 FE

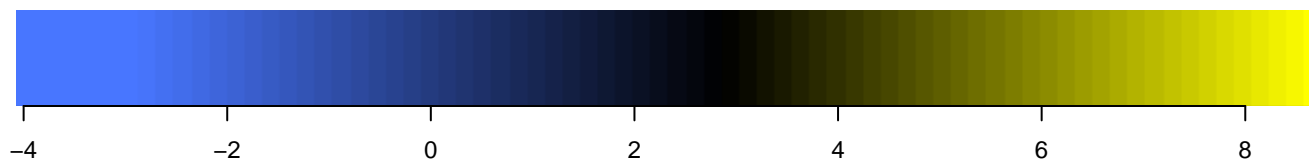



# NAKAYAMA\_SOFT\_TISSUE\_TUMORS\_PCA2\_UP

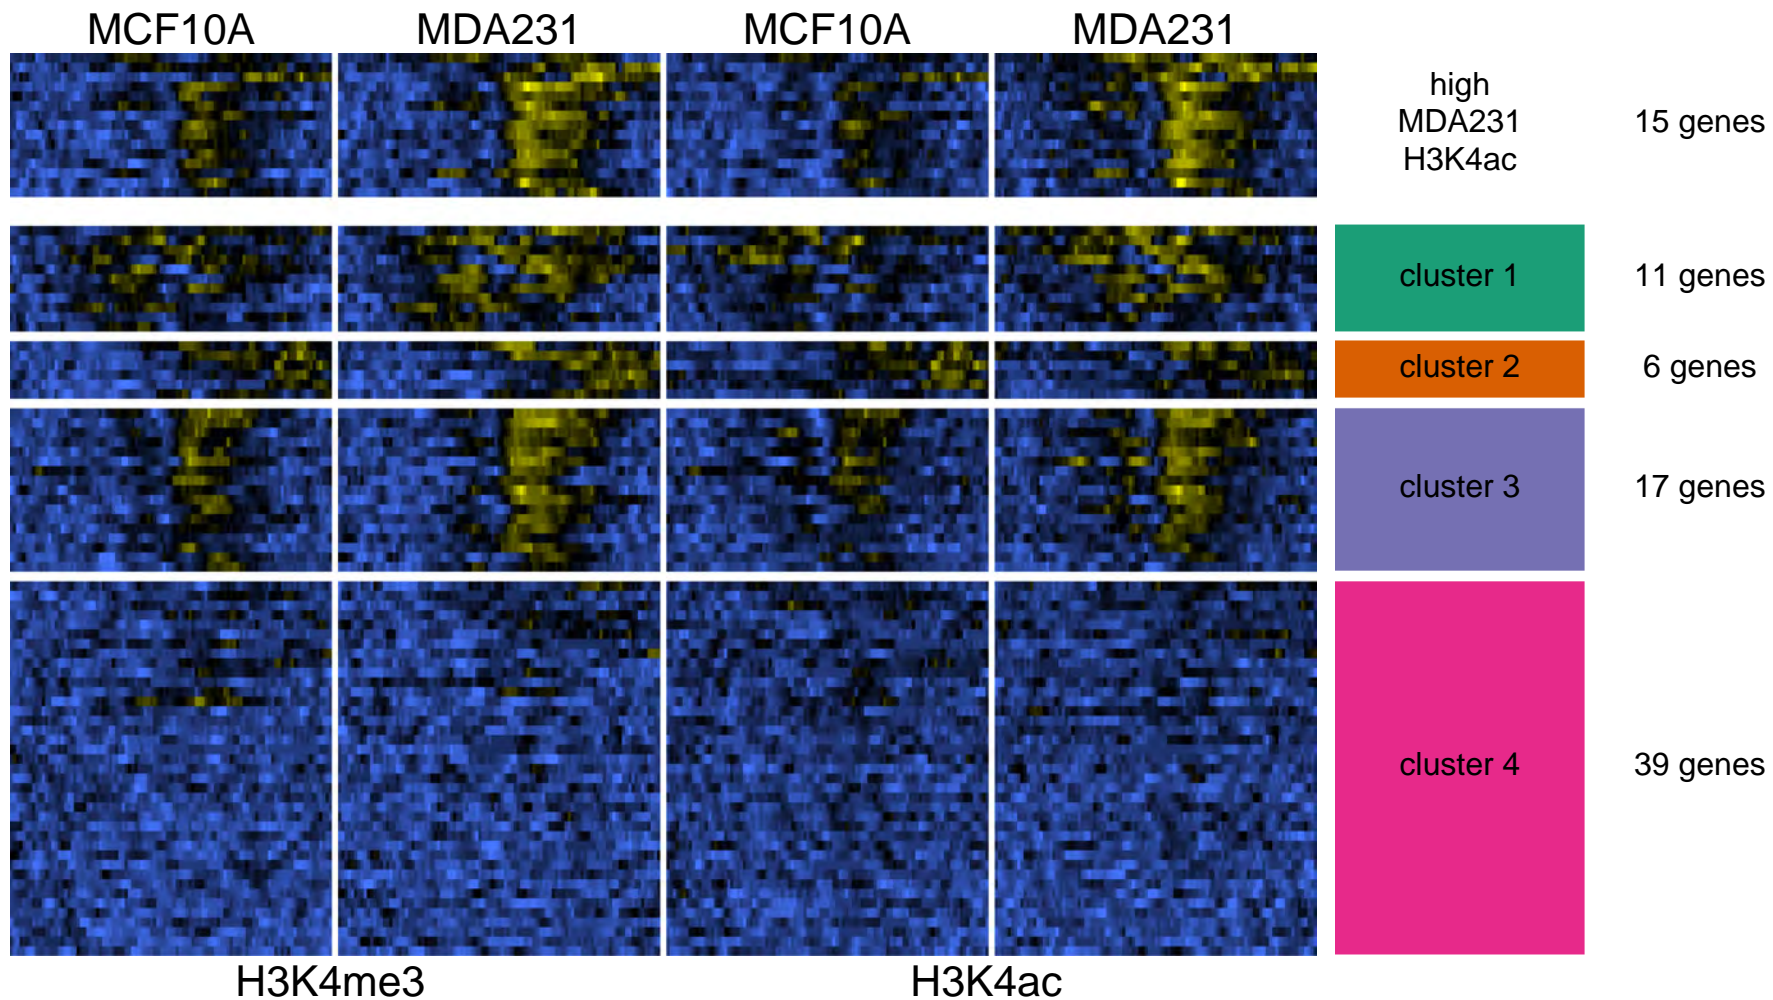

log2 FE

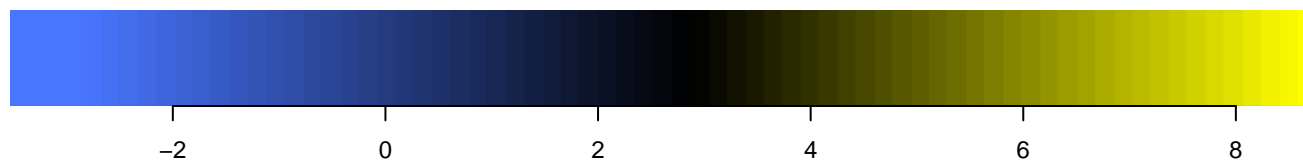

# SOTIRIOU\_BREAST\_CANCER\_GRADE\_1\_VS\_3\_UP

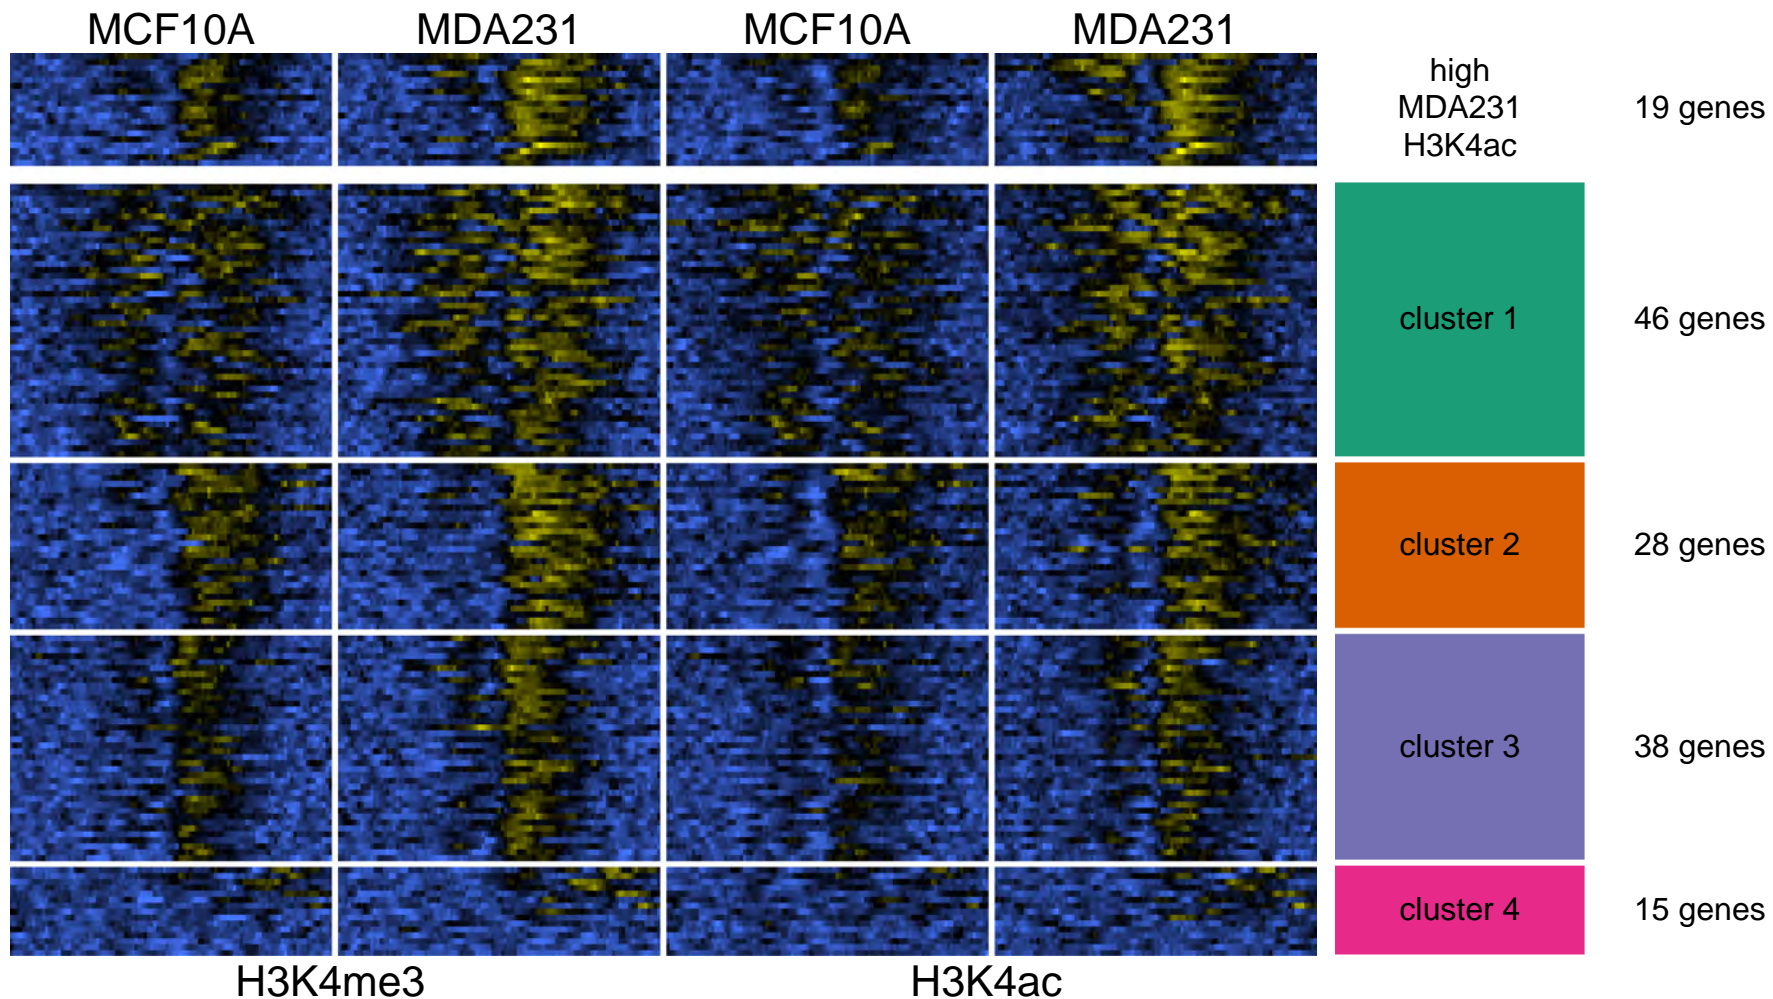

H3K4me3

H3K4ac

log2 FE

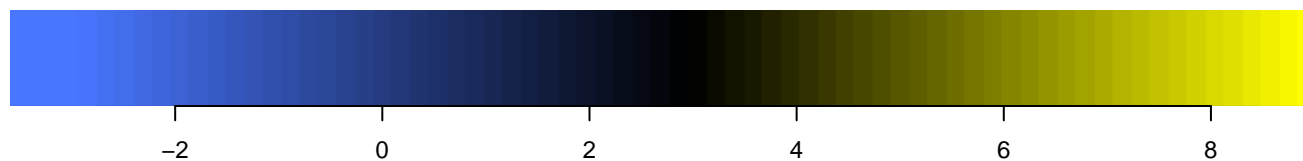

# CHARAFE\_BREAST\_CANCER\_LUMINAL\_VS\_MESENCHYMAL\_UP

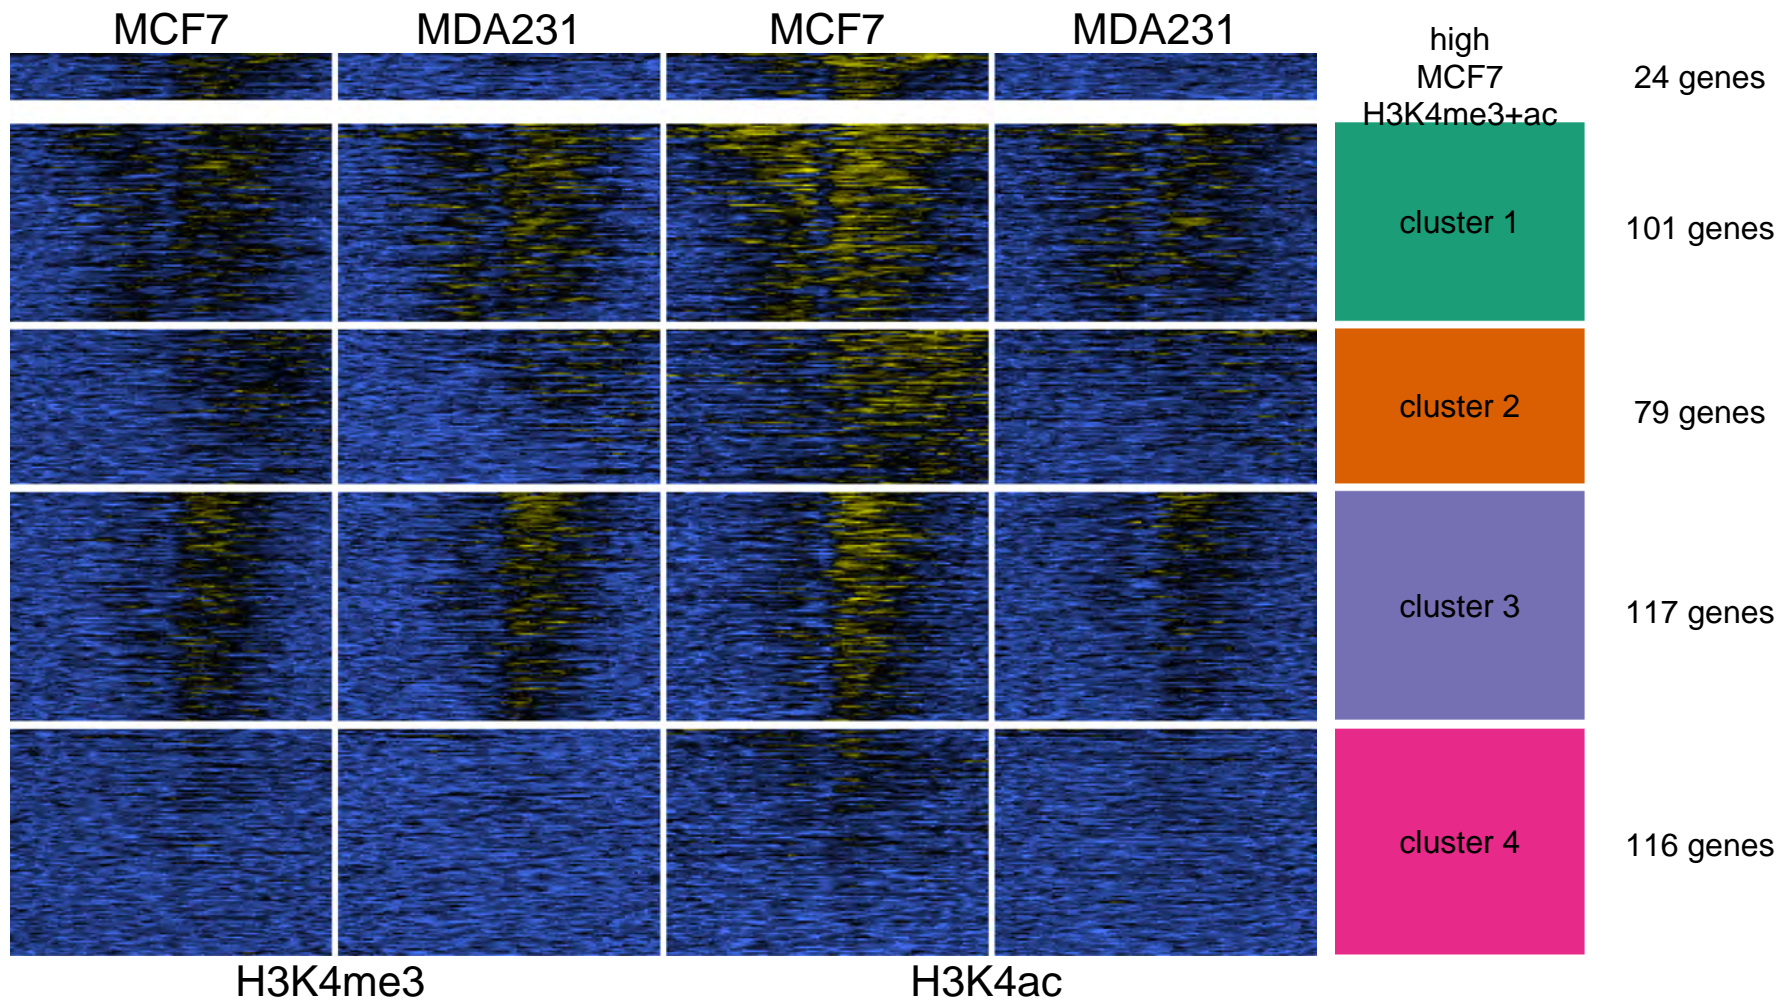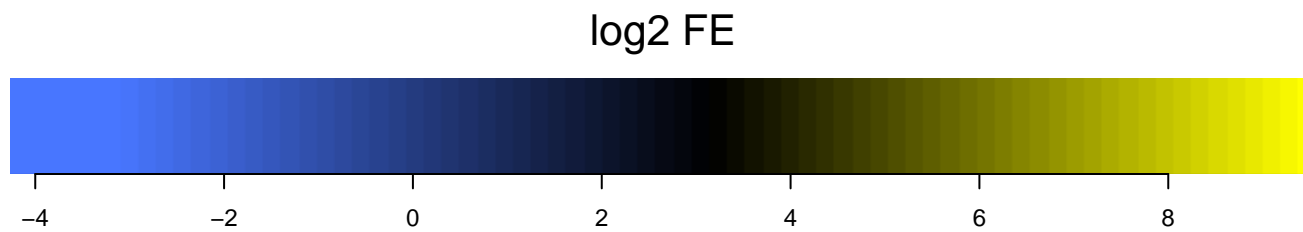

# MEISSNER\_BRAIN\_HCP\_WITH\_H3K4ME3\_AND\_H3K27ME3

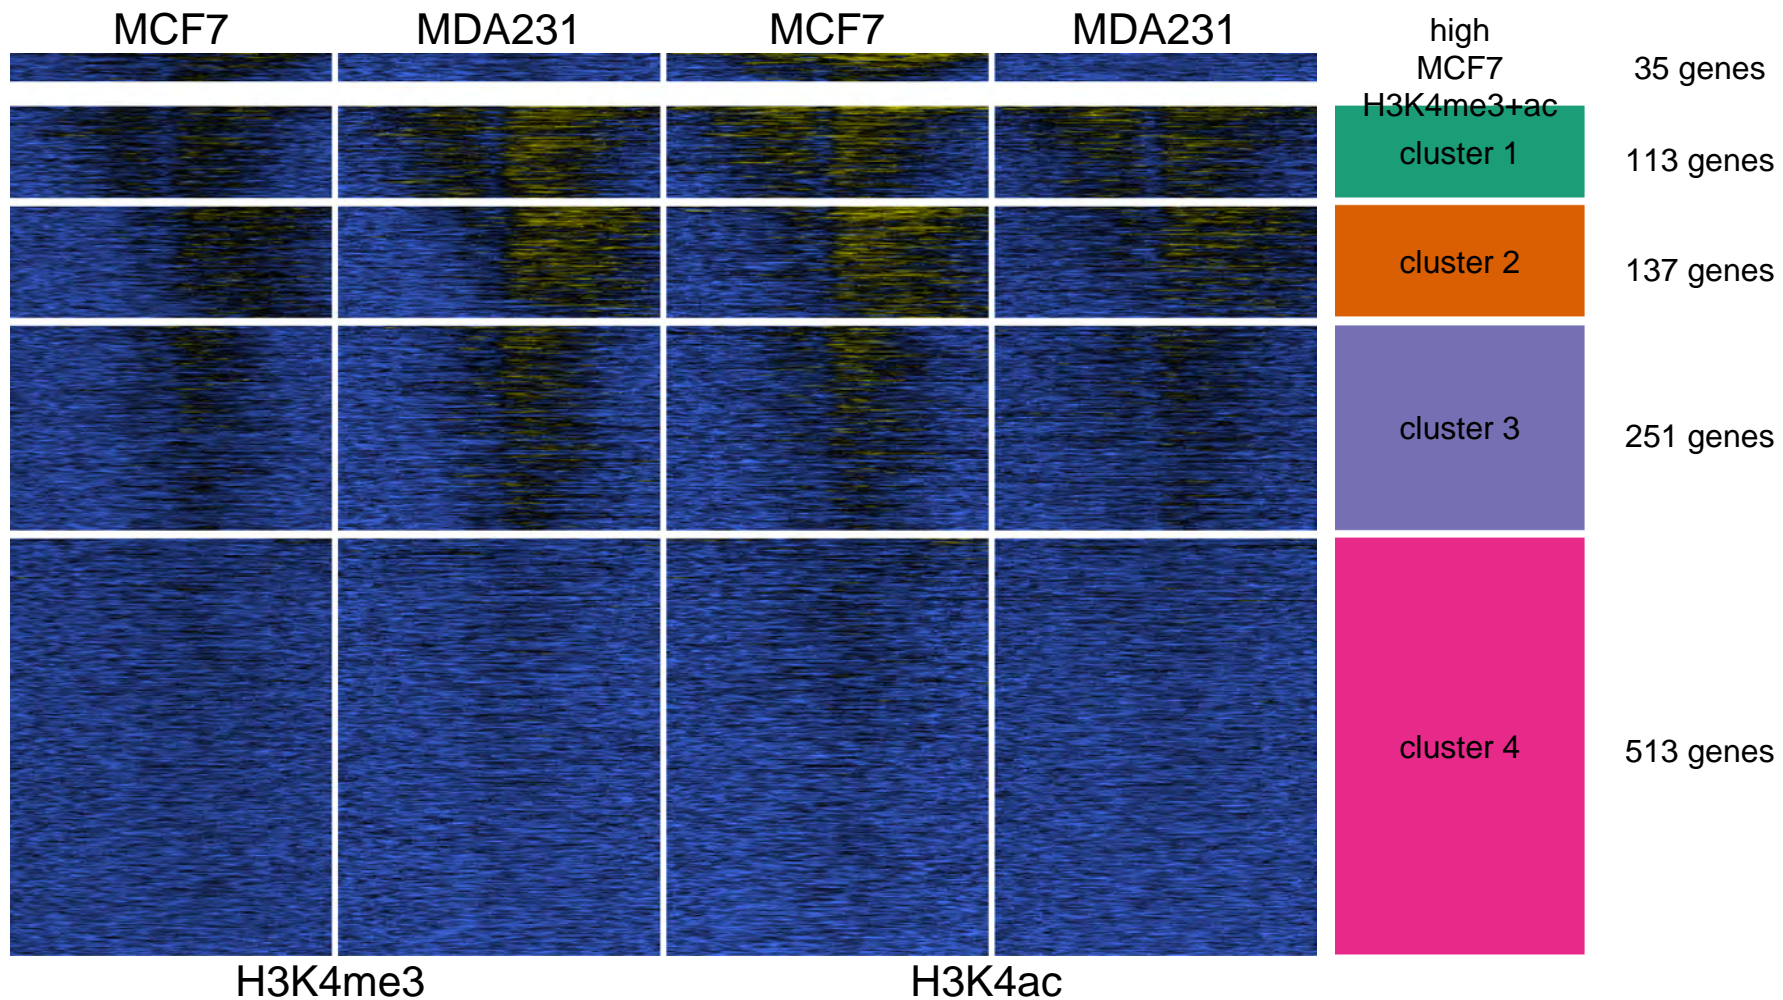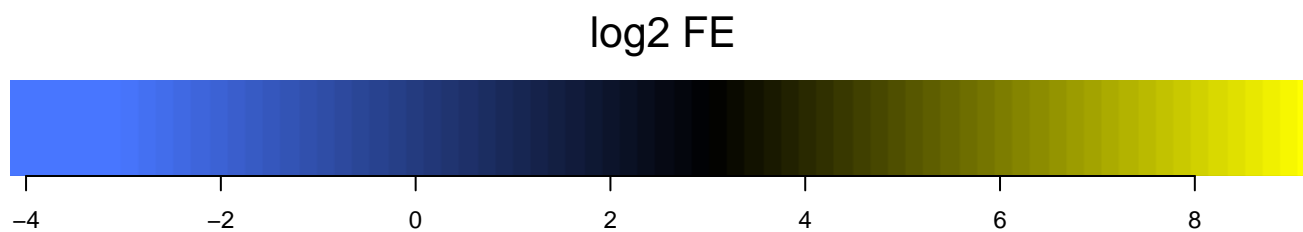

# REACTOME\_RNA\_POL\_I\_PROMOTER\_OPENING

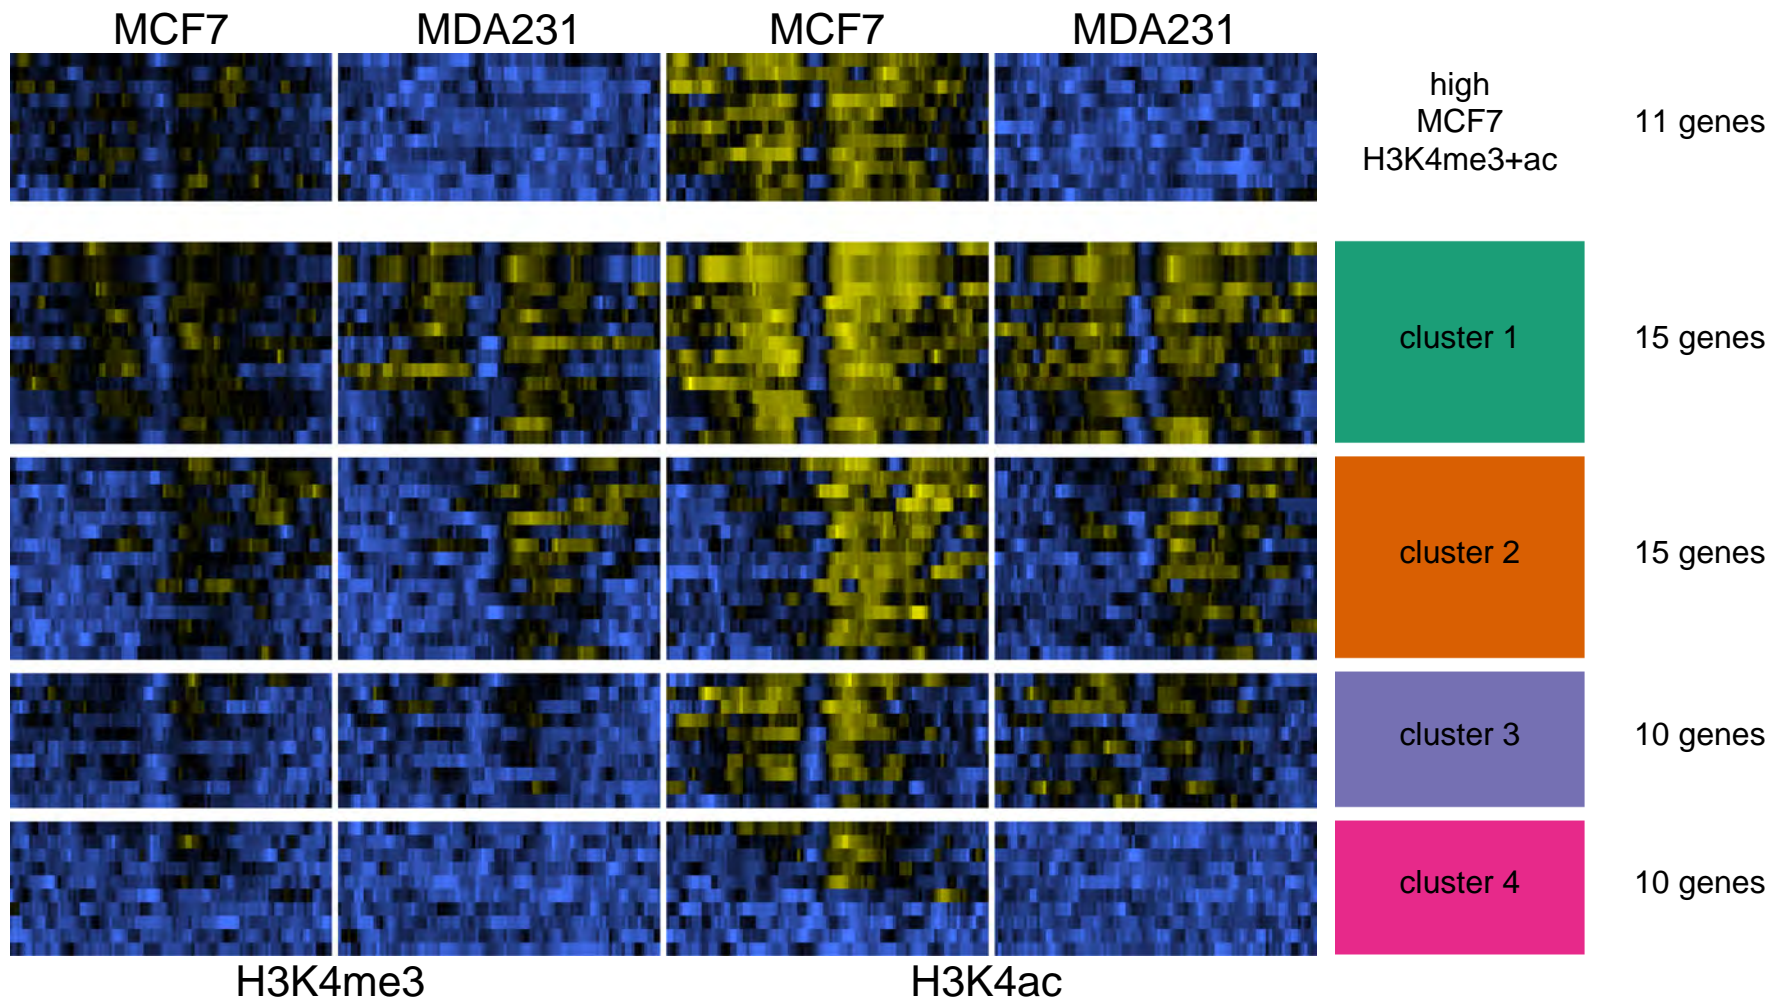

log<sub>2</sub> FE

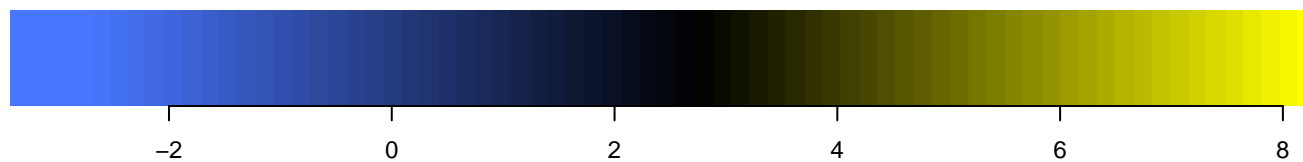

# BHAT\_ESR1\_TARGETS\_NOT\_VIA\_AKT1\_UP

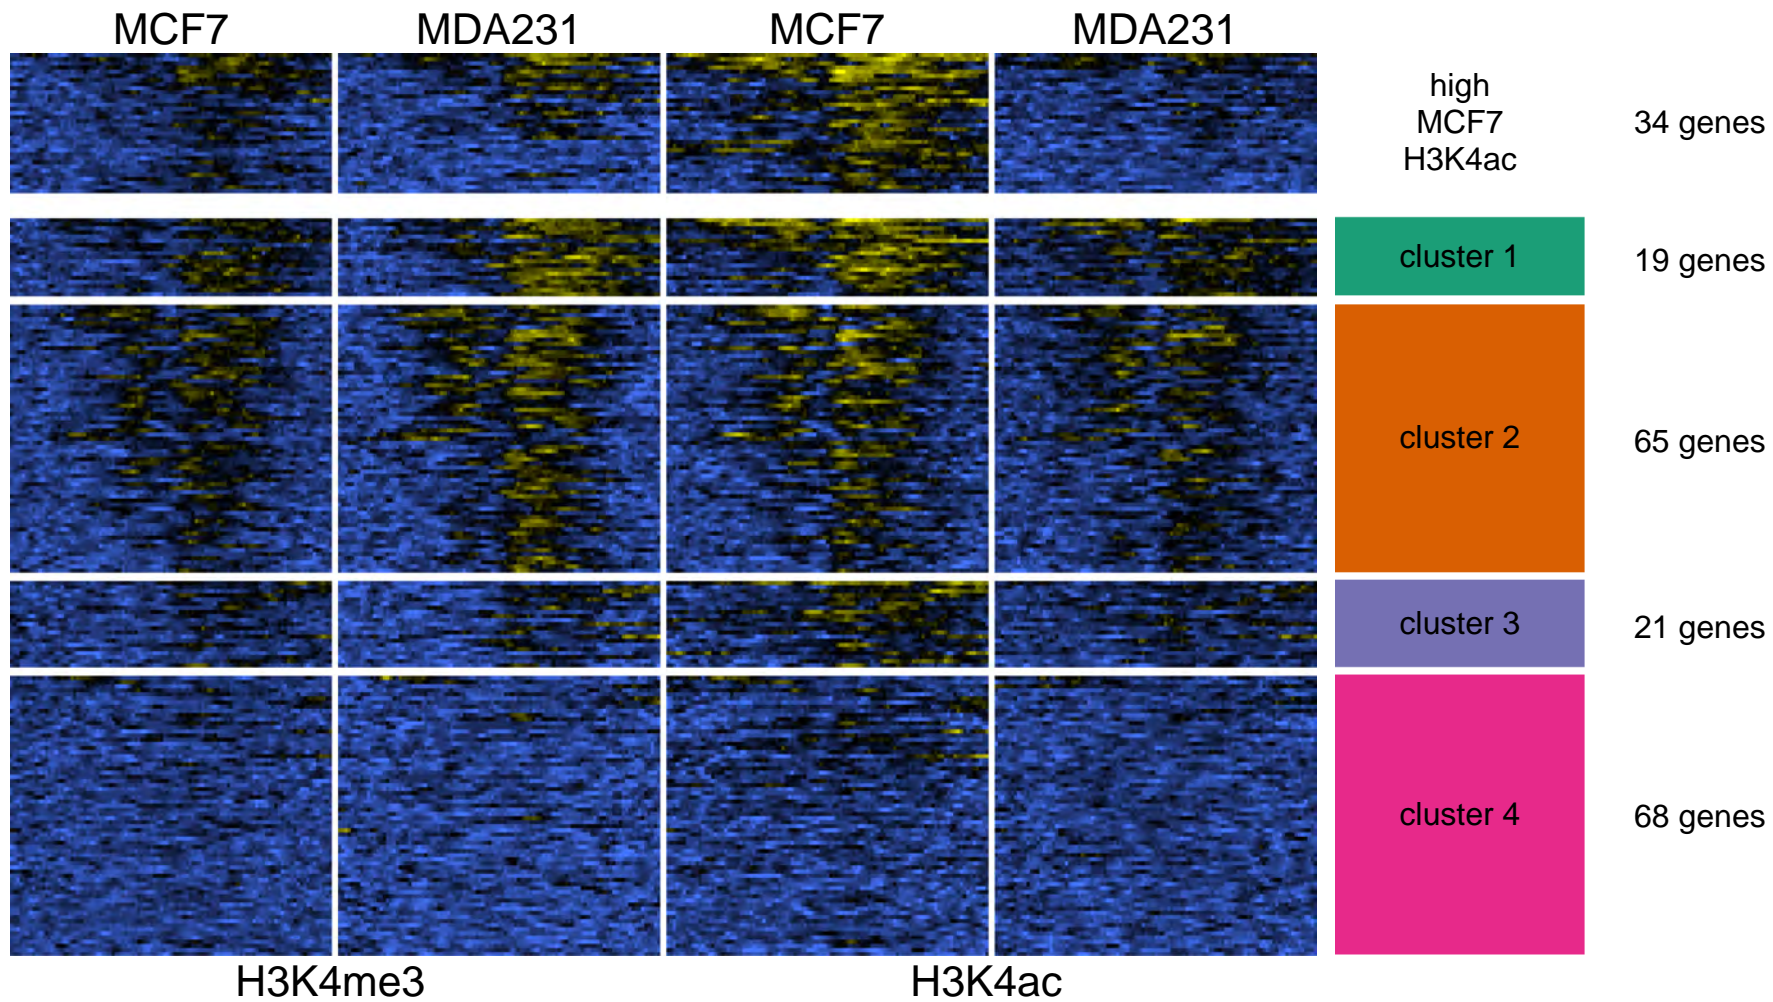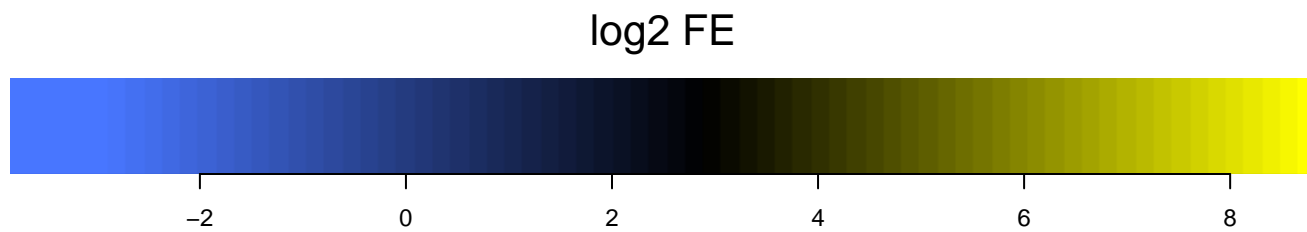

# BHAT\_ESR1\_TARGETS\_VIA\_AKT1\_UP

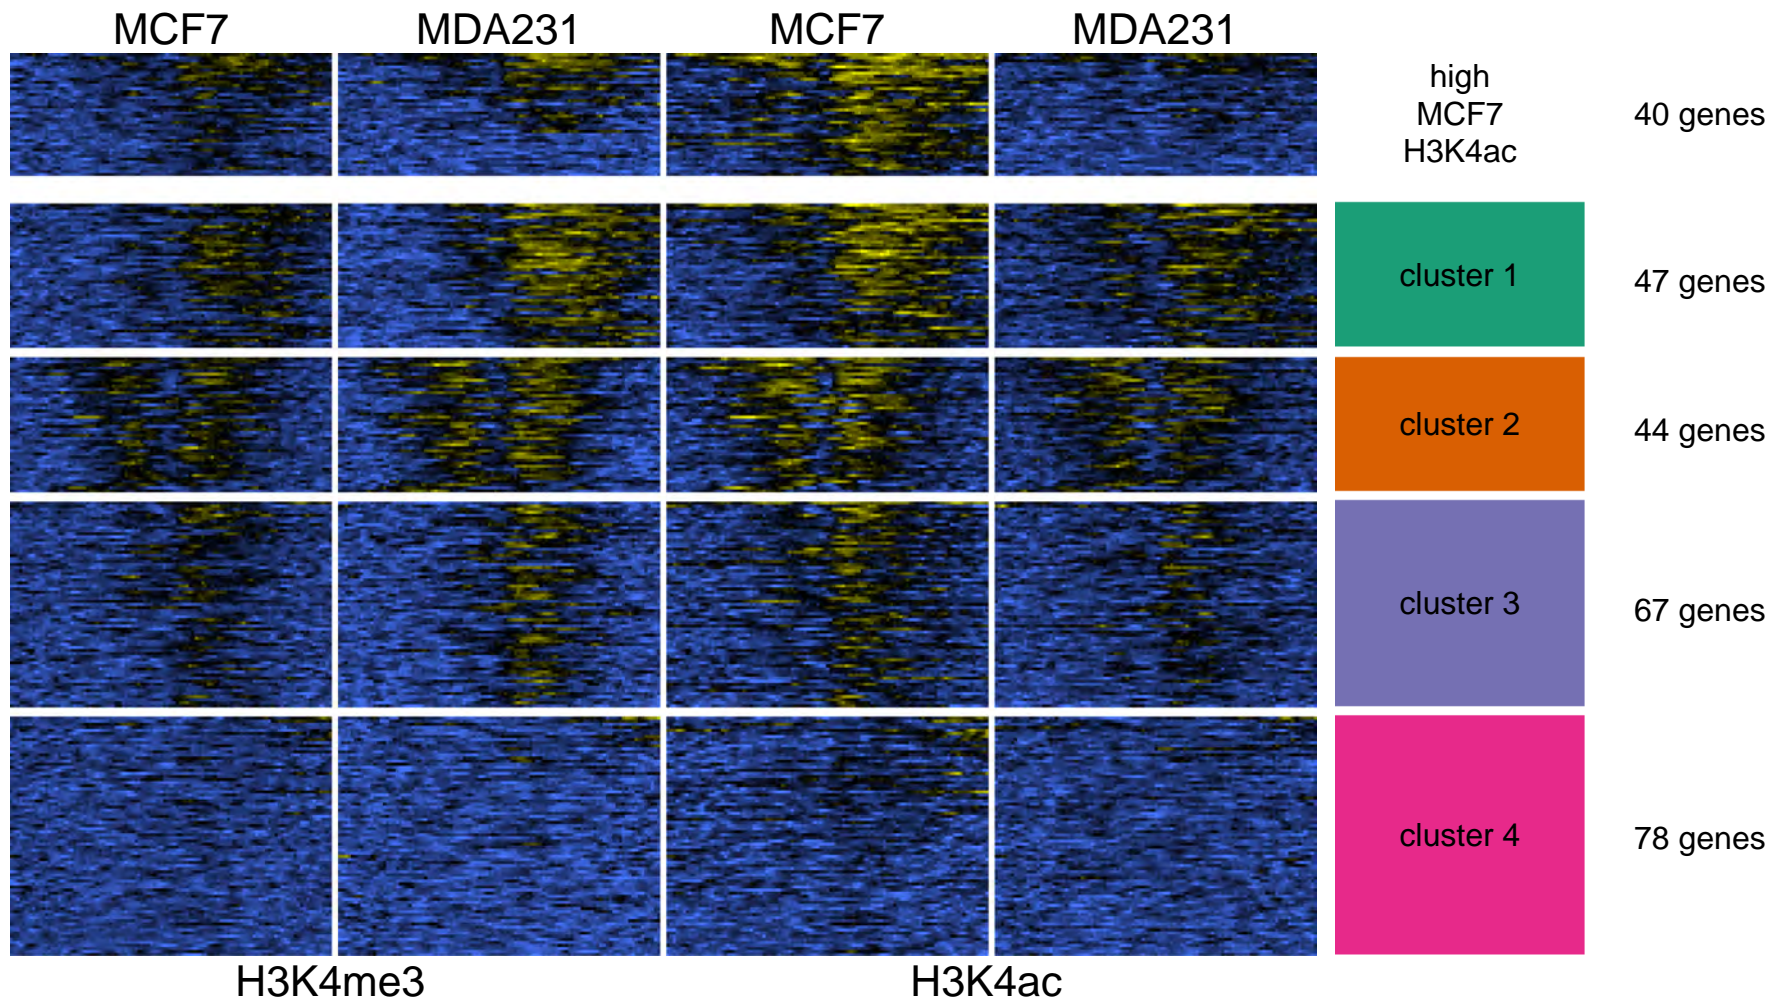

MCF7

MDA231

MCF7

MDA231

high  
MCF7  
H3K4ac

40 genes

cluster 1

47 genes

cluster 2

44 genes

cluster 3

67 genes

cluster 4

78 genes

H3K4me3

H3K4ac

log2 FE

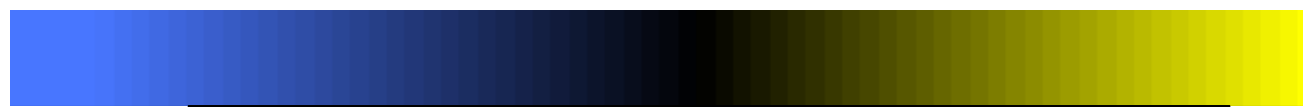

-2

0

2

4

6

8

# CHARAFE\_BREAST\_CANCER\_BASAL\_VS\_MESENCHYMAL\_UP

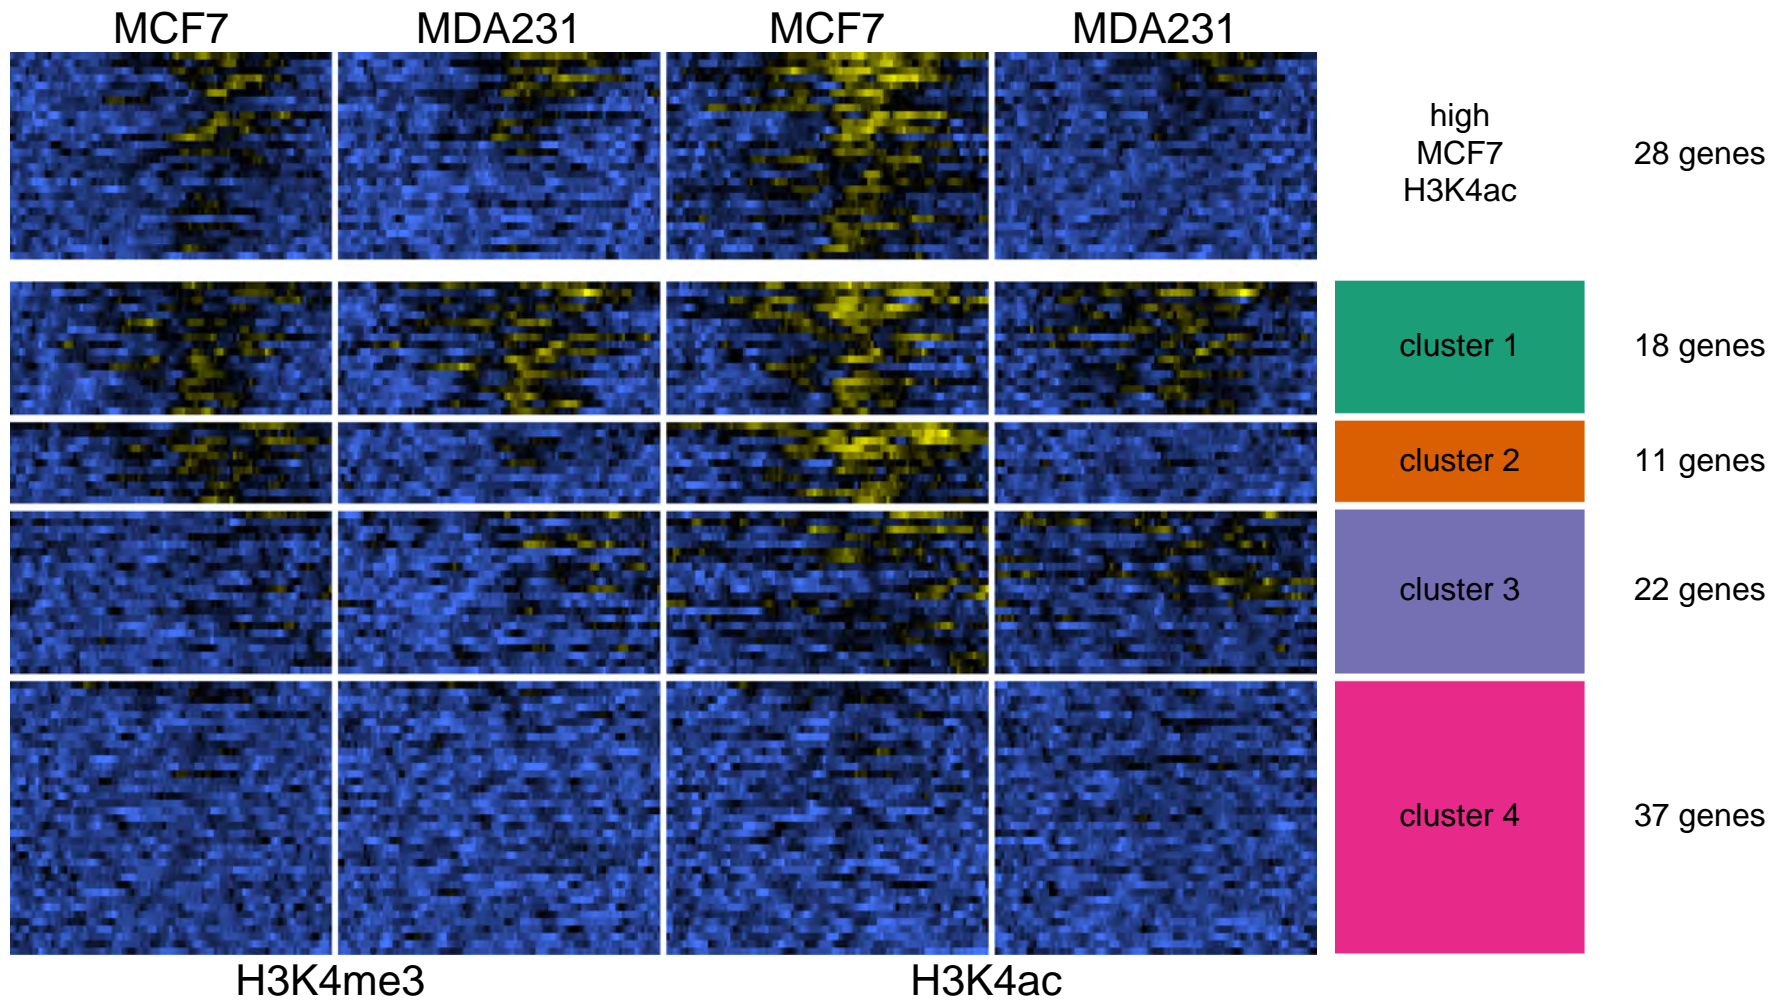

log2 FE

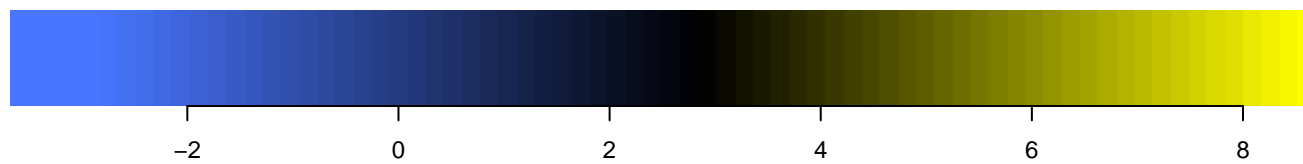



CHARAFE\_BREAST\_CANCER\_LUMINAL\_VS\_BASAL\_UP

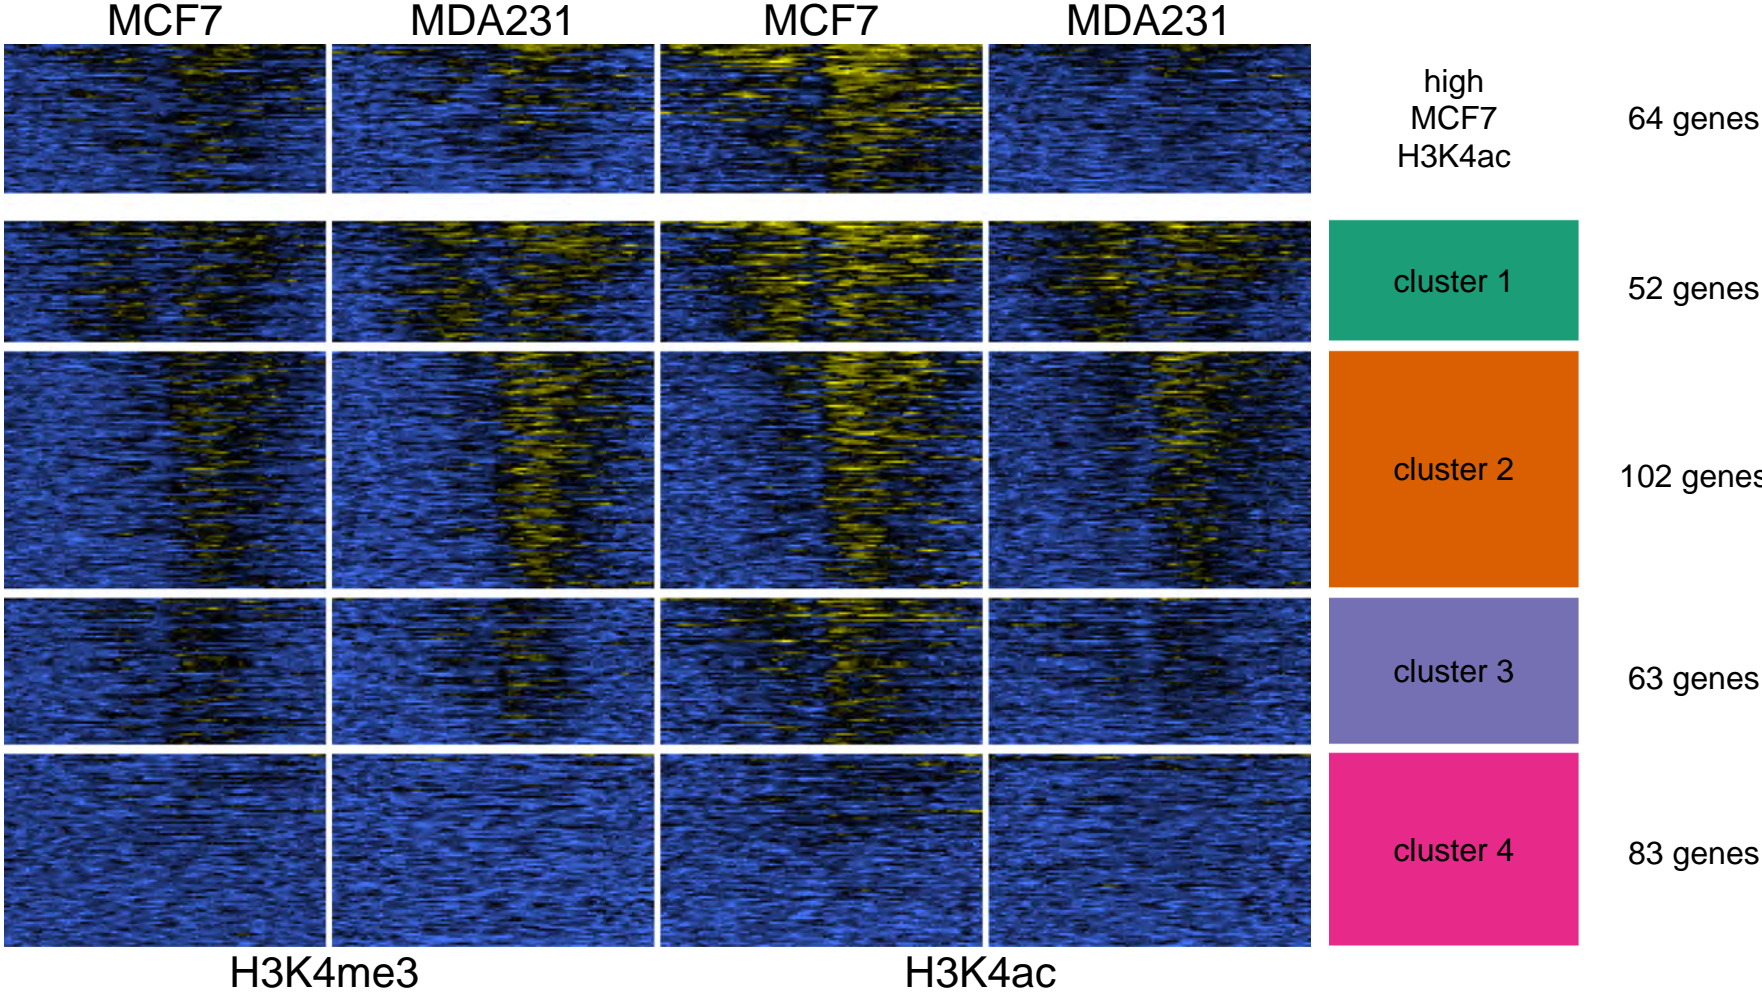

# CHARAFE\_BREAST\_CANCER\_LUMINAL\_VS\_MESENCHYMAL\_UP

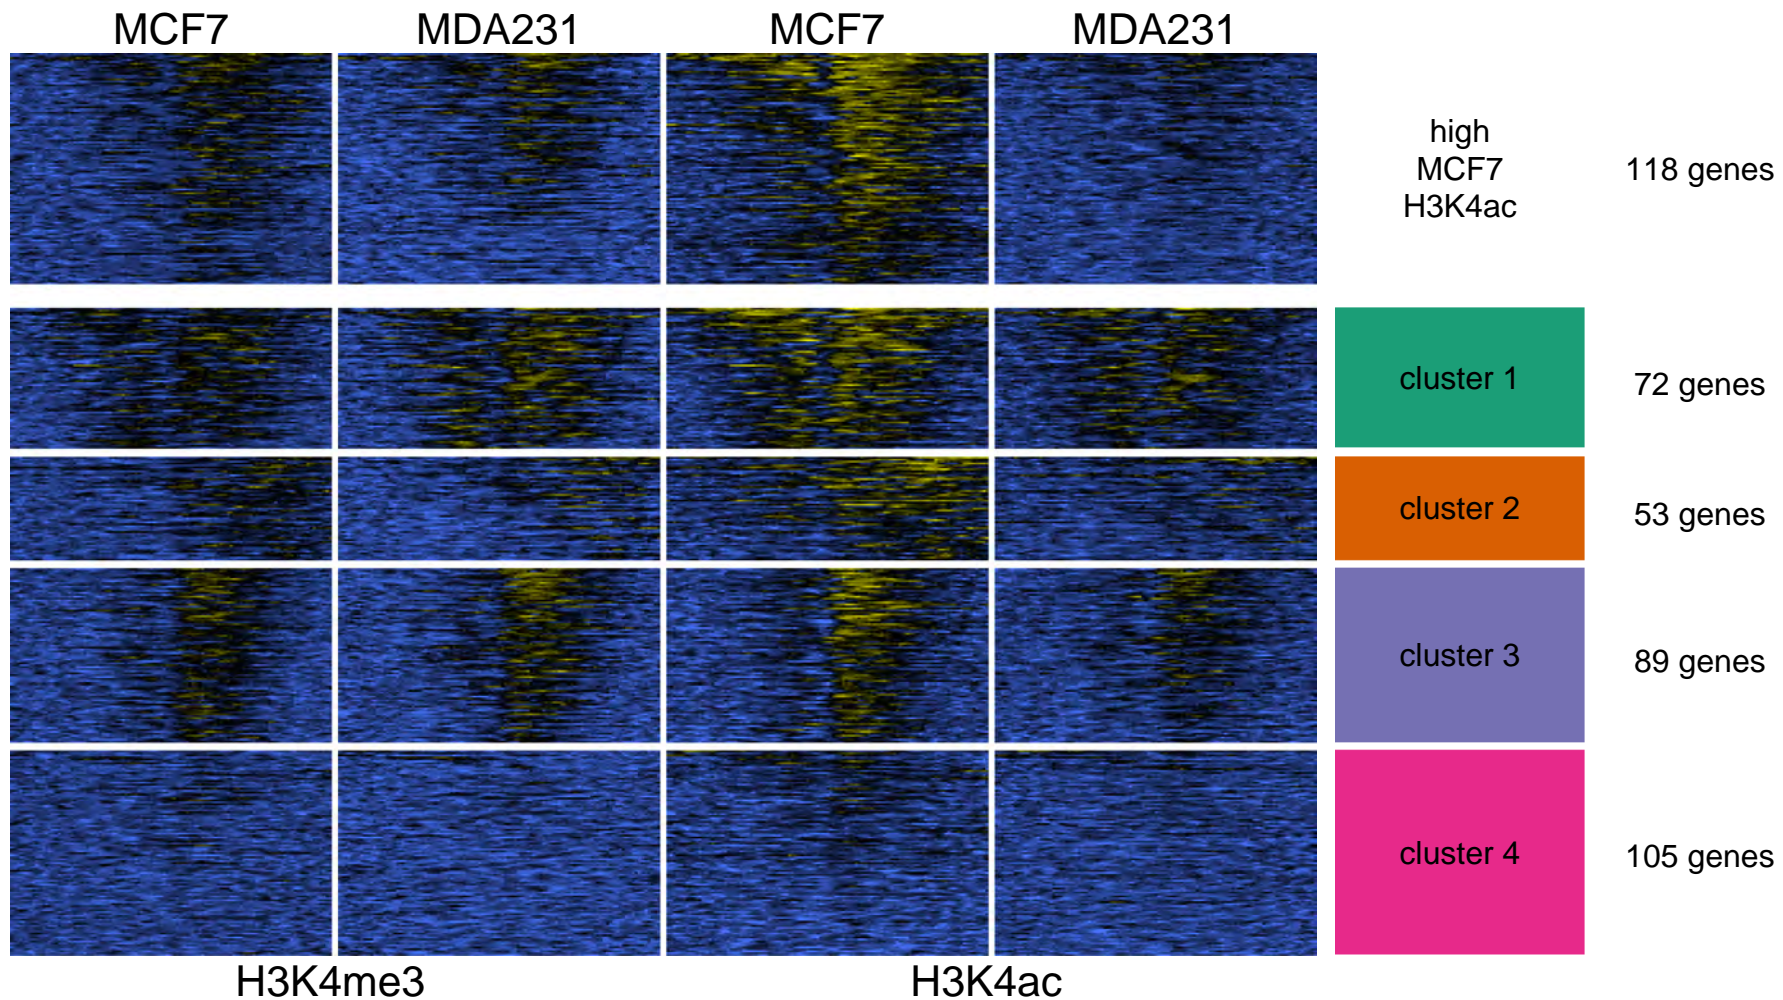

log2 FE

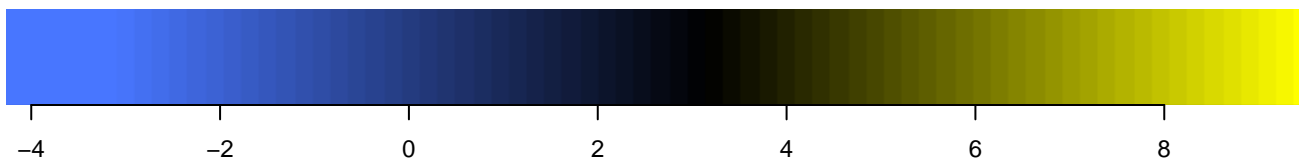

# COLDREN\_GEFITINIB\_RESISTANCE\_DN

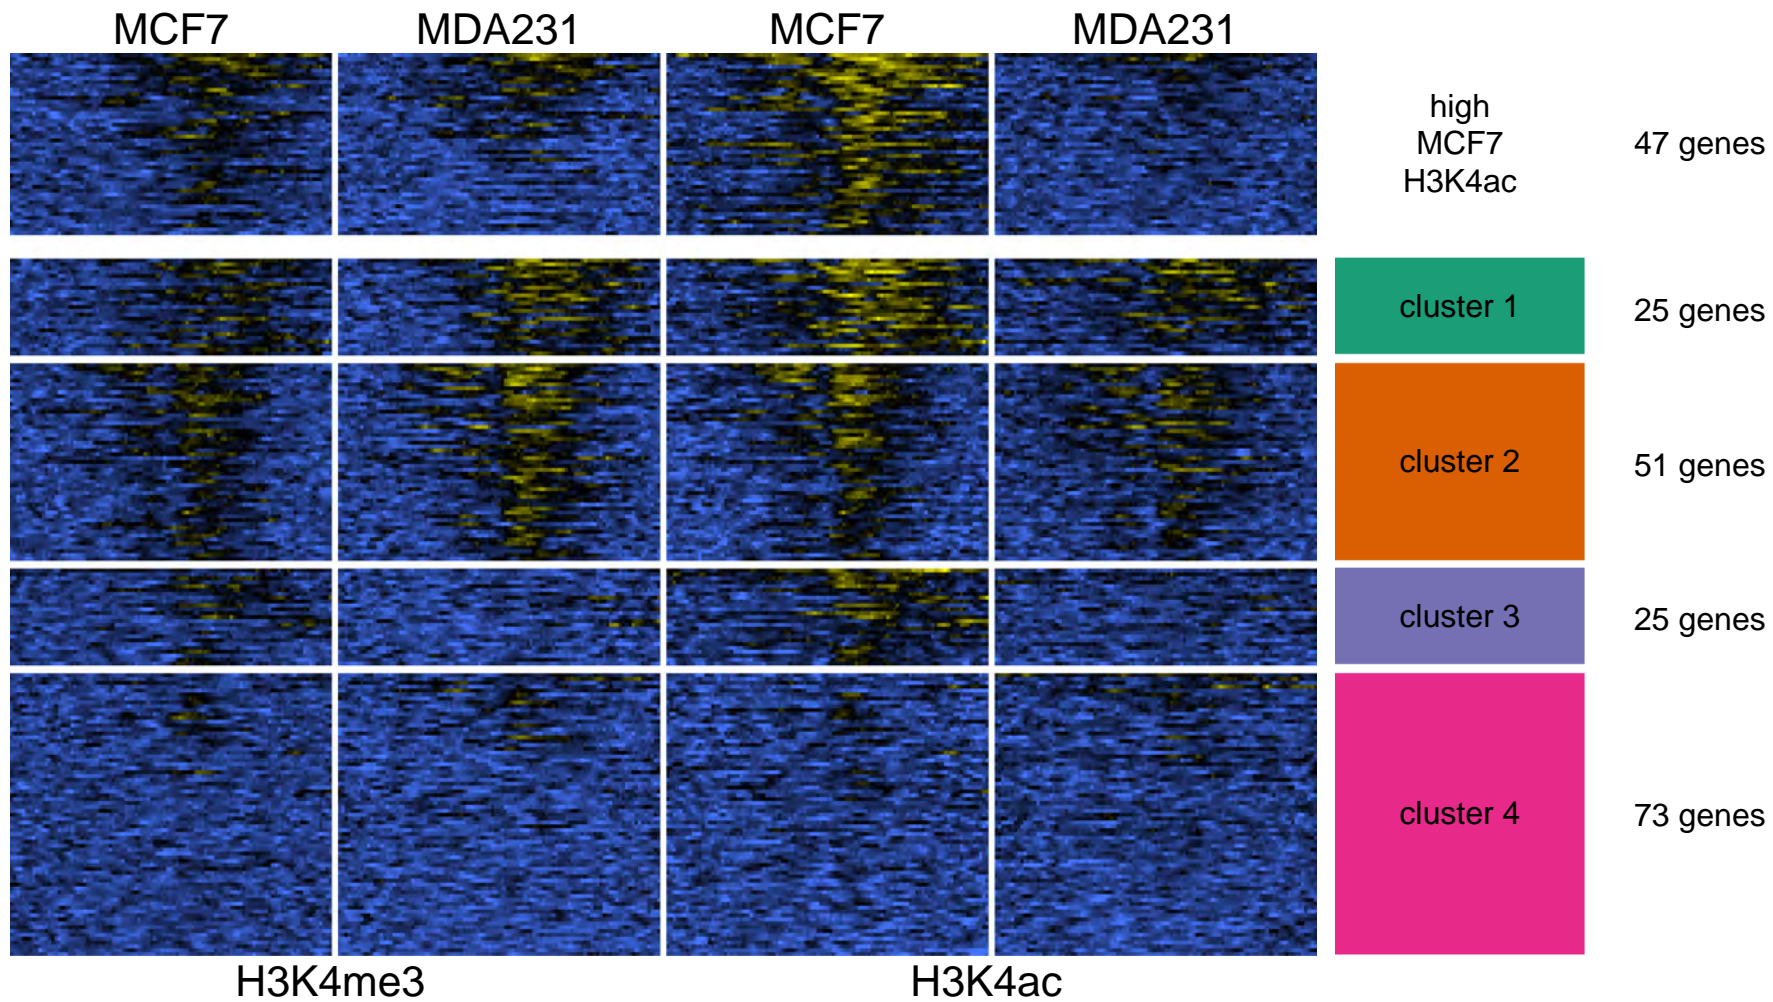

log2 FE

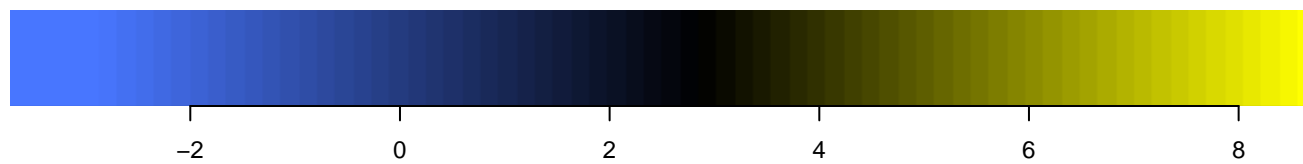

# CREIGHTON\_ENDOCRINE\_THERAPY\_RESISTANCE\_1

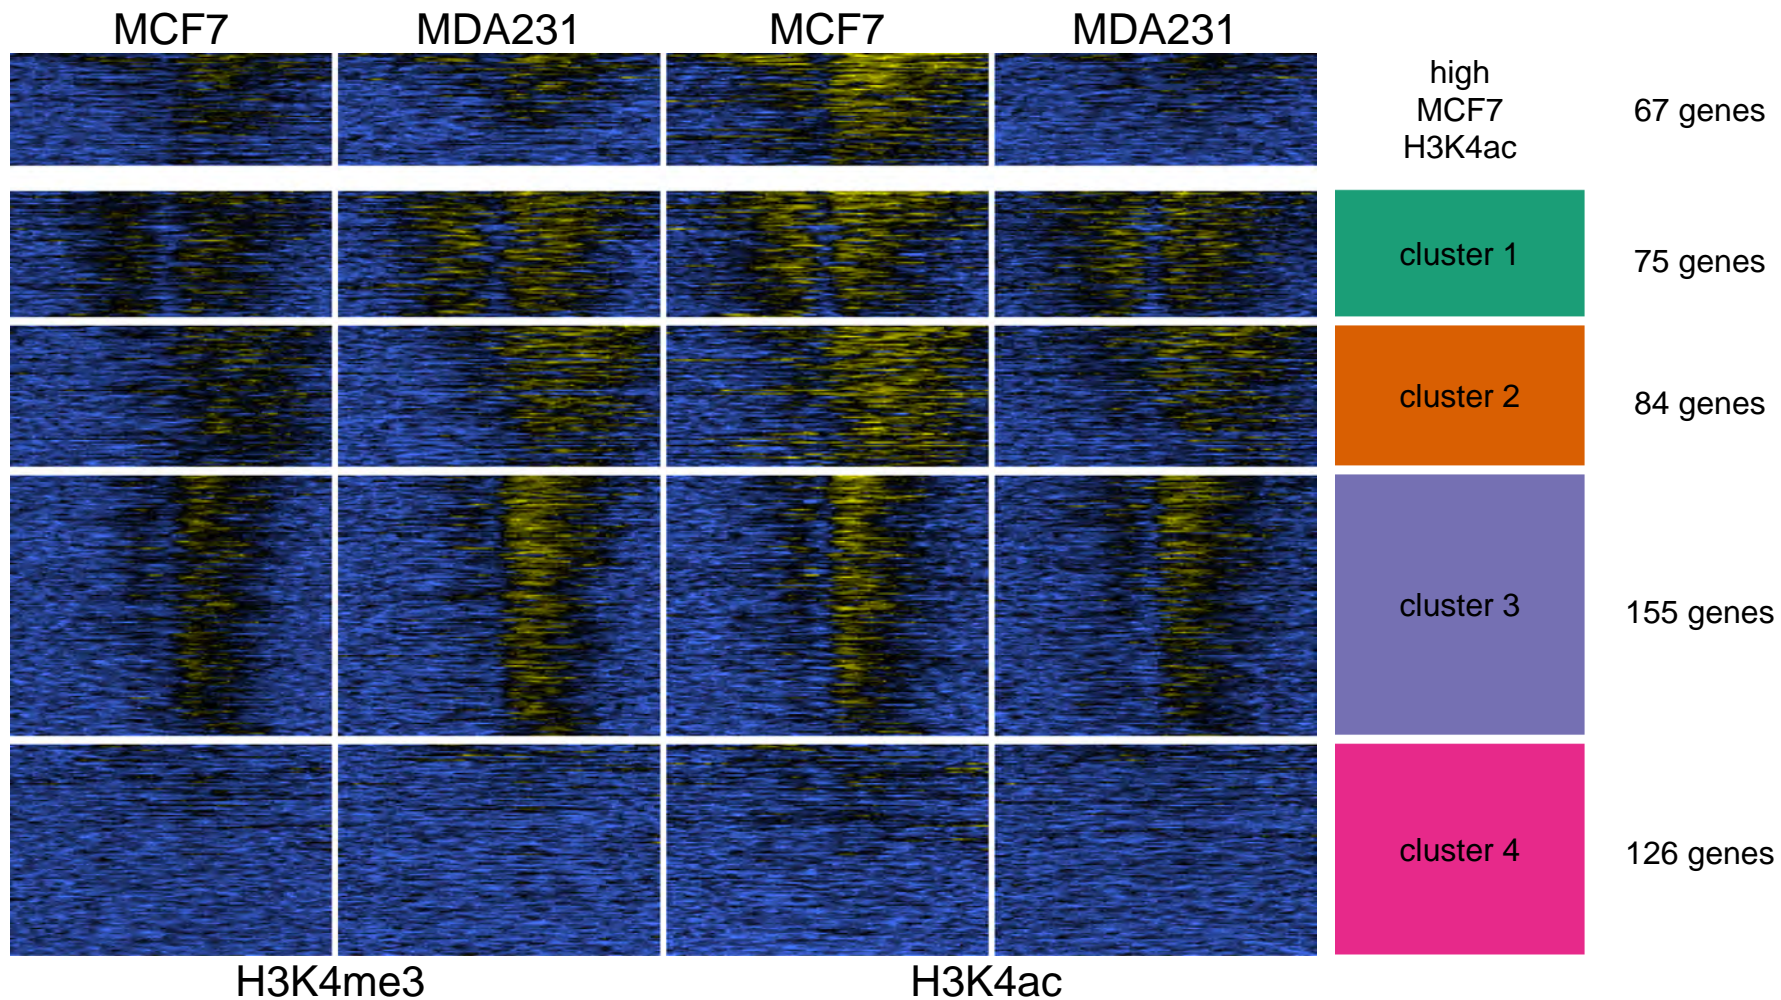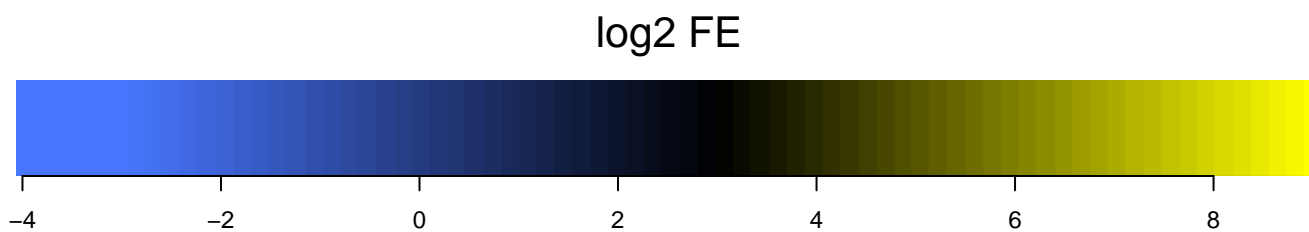

# GOZGIT\_ESR1\_TARGETS\_DN

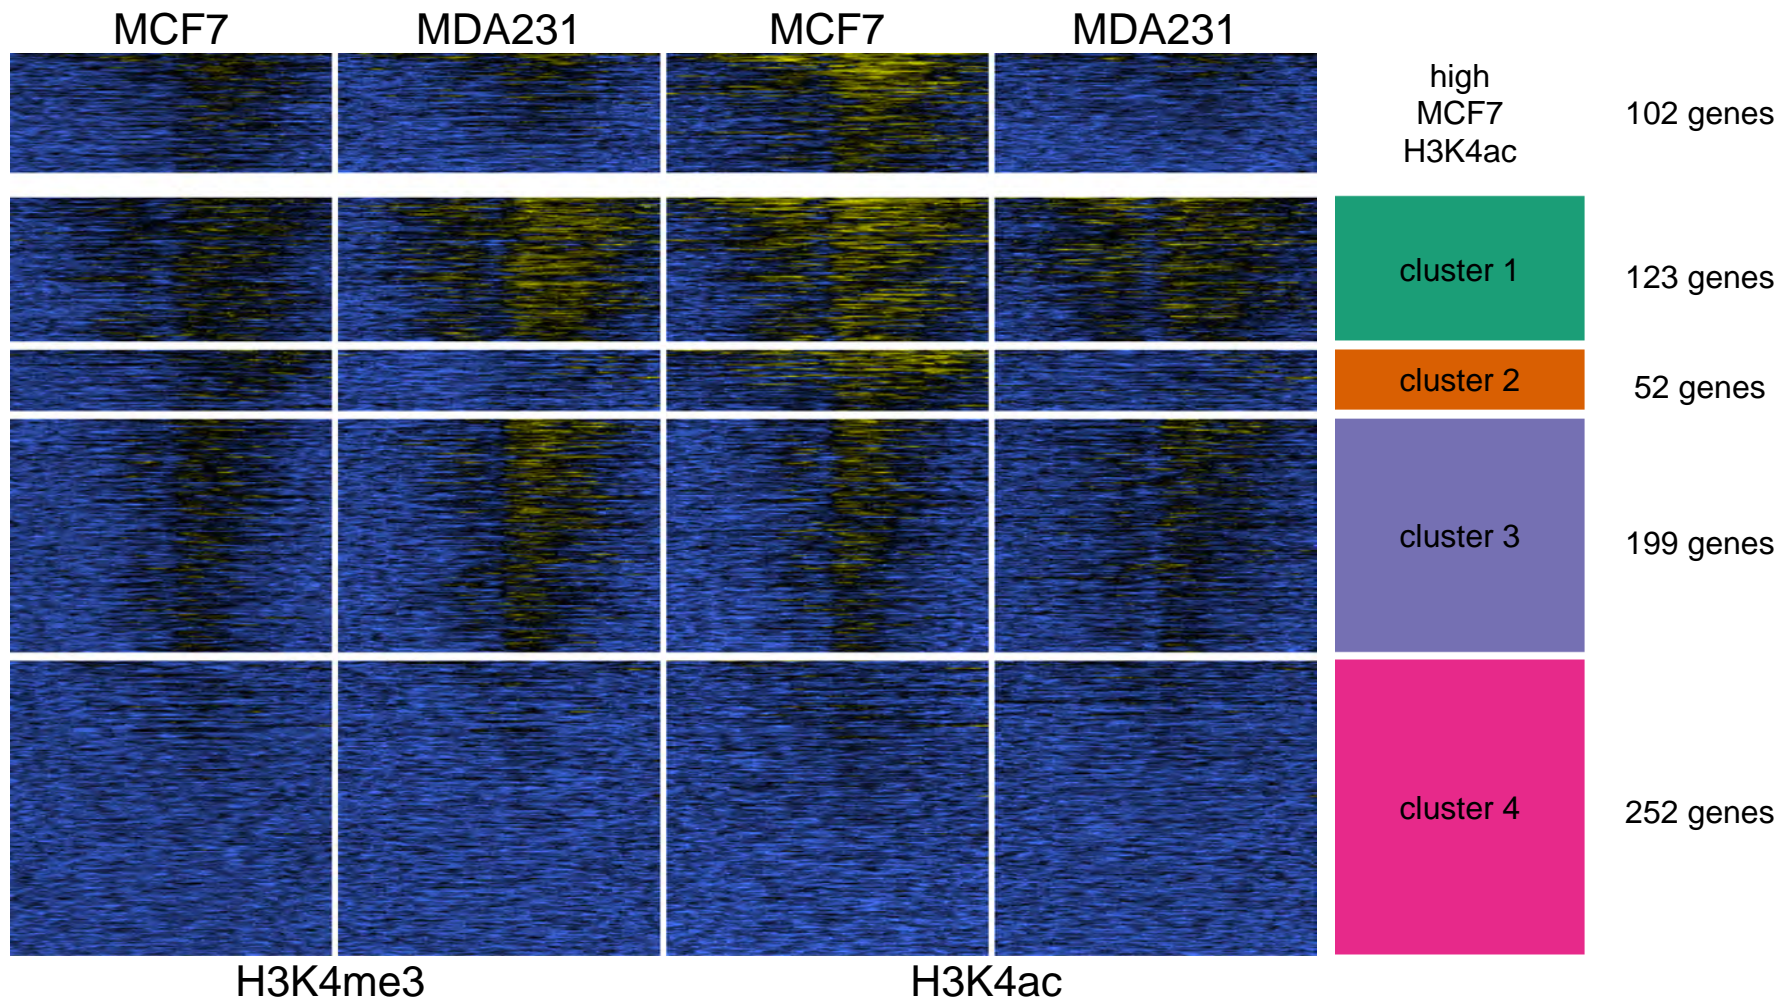

log2 FE

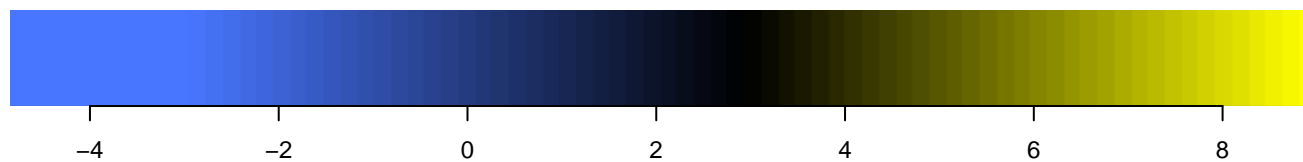

# LIM\_MAMMARY\_STEM\_CELL\_DN

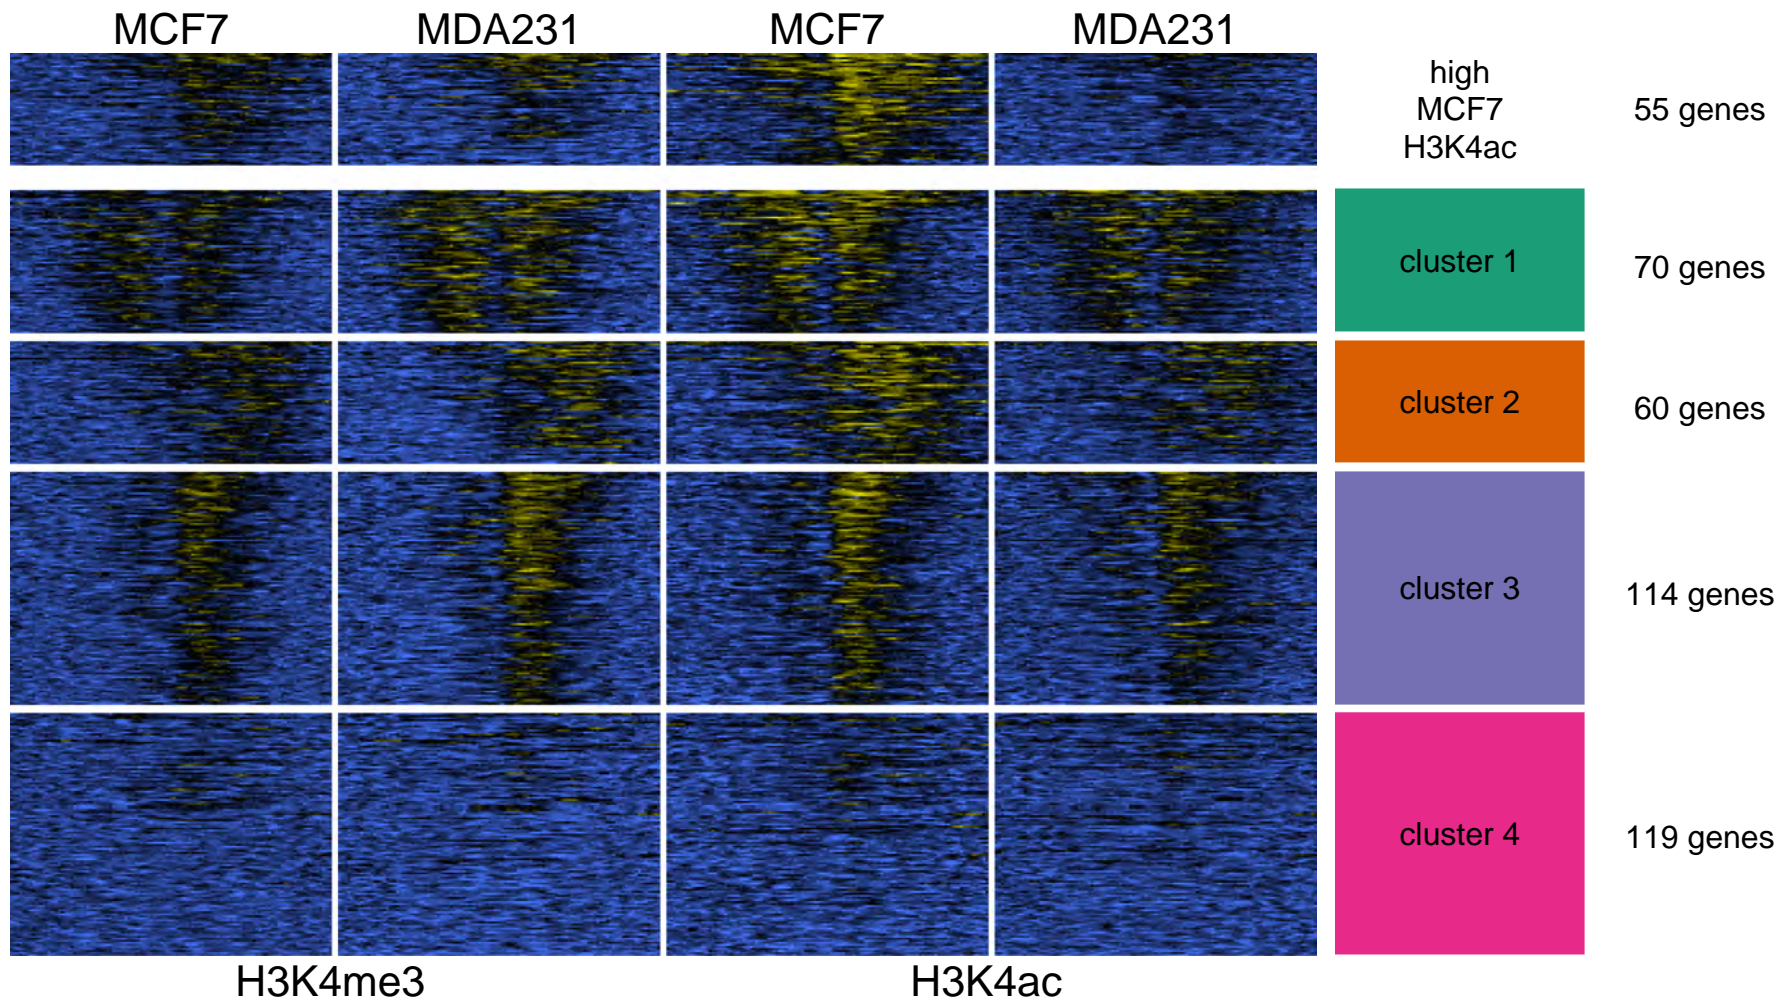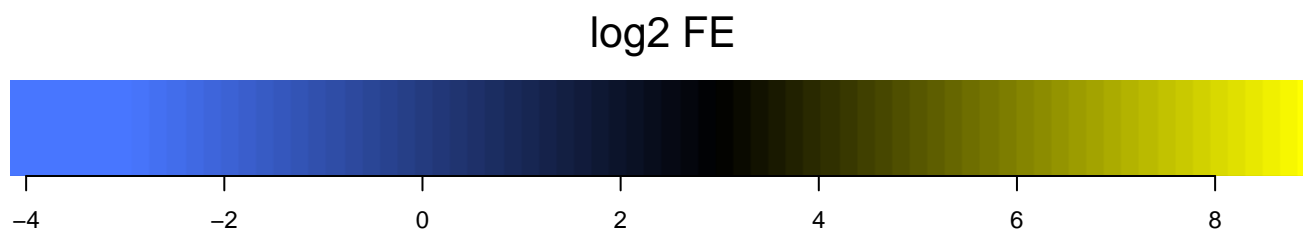

# MASSARWEH\_TAMOXIFEN\_RESISTANCE\_DN

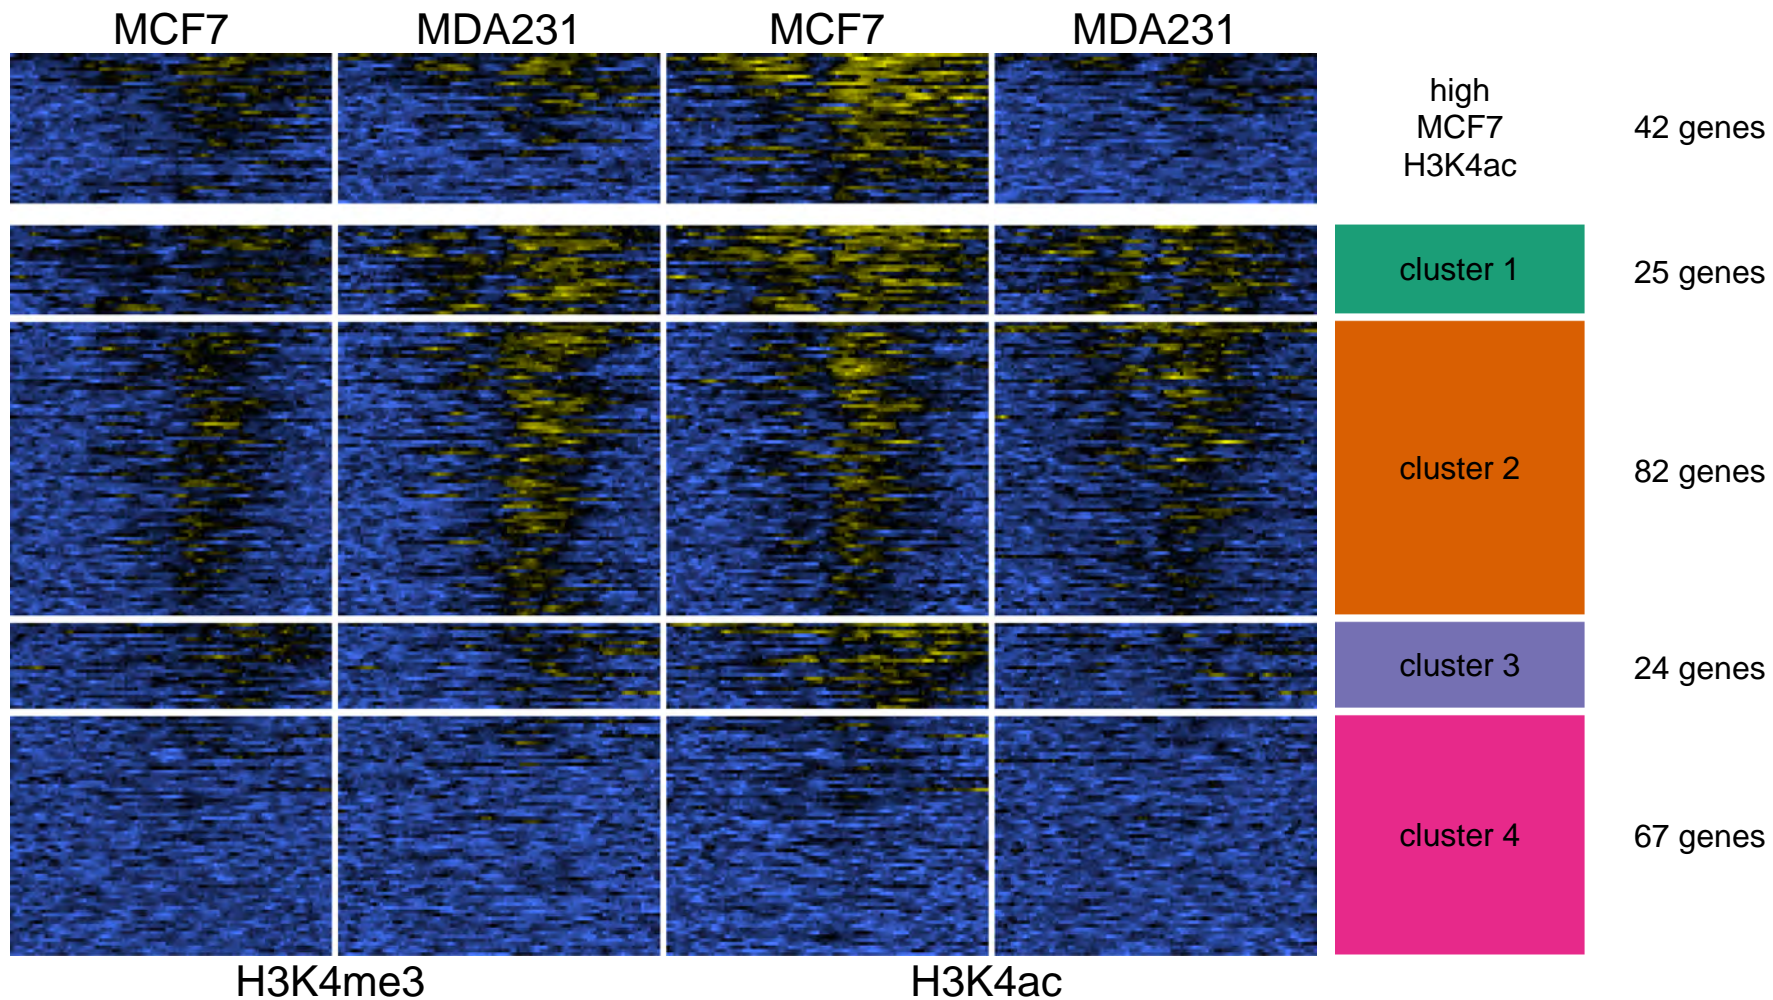

log2 FE

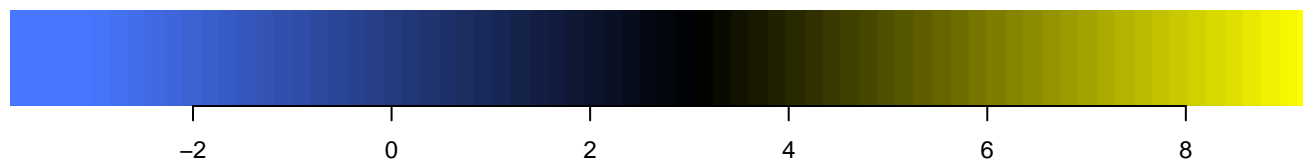

# MEISSNER\_BRAIN\_HCP\_WITH\_H3K4ME3\_AND\_H3K27ME3

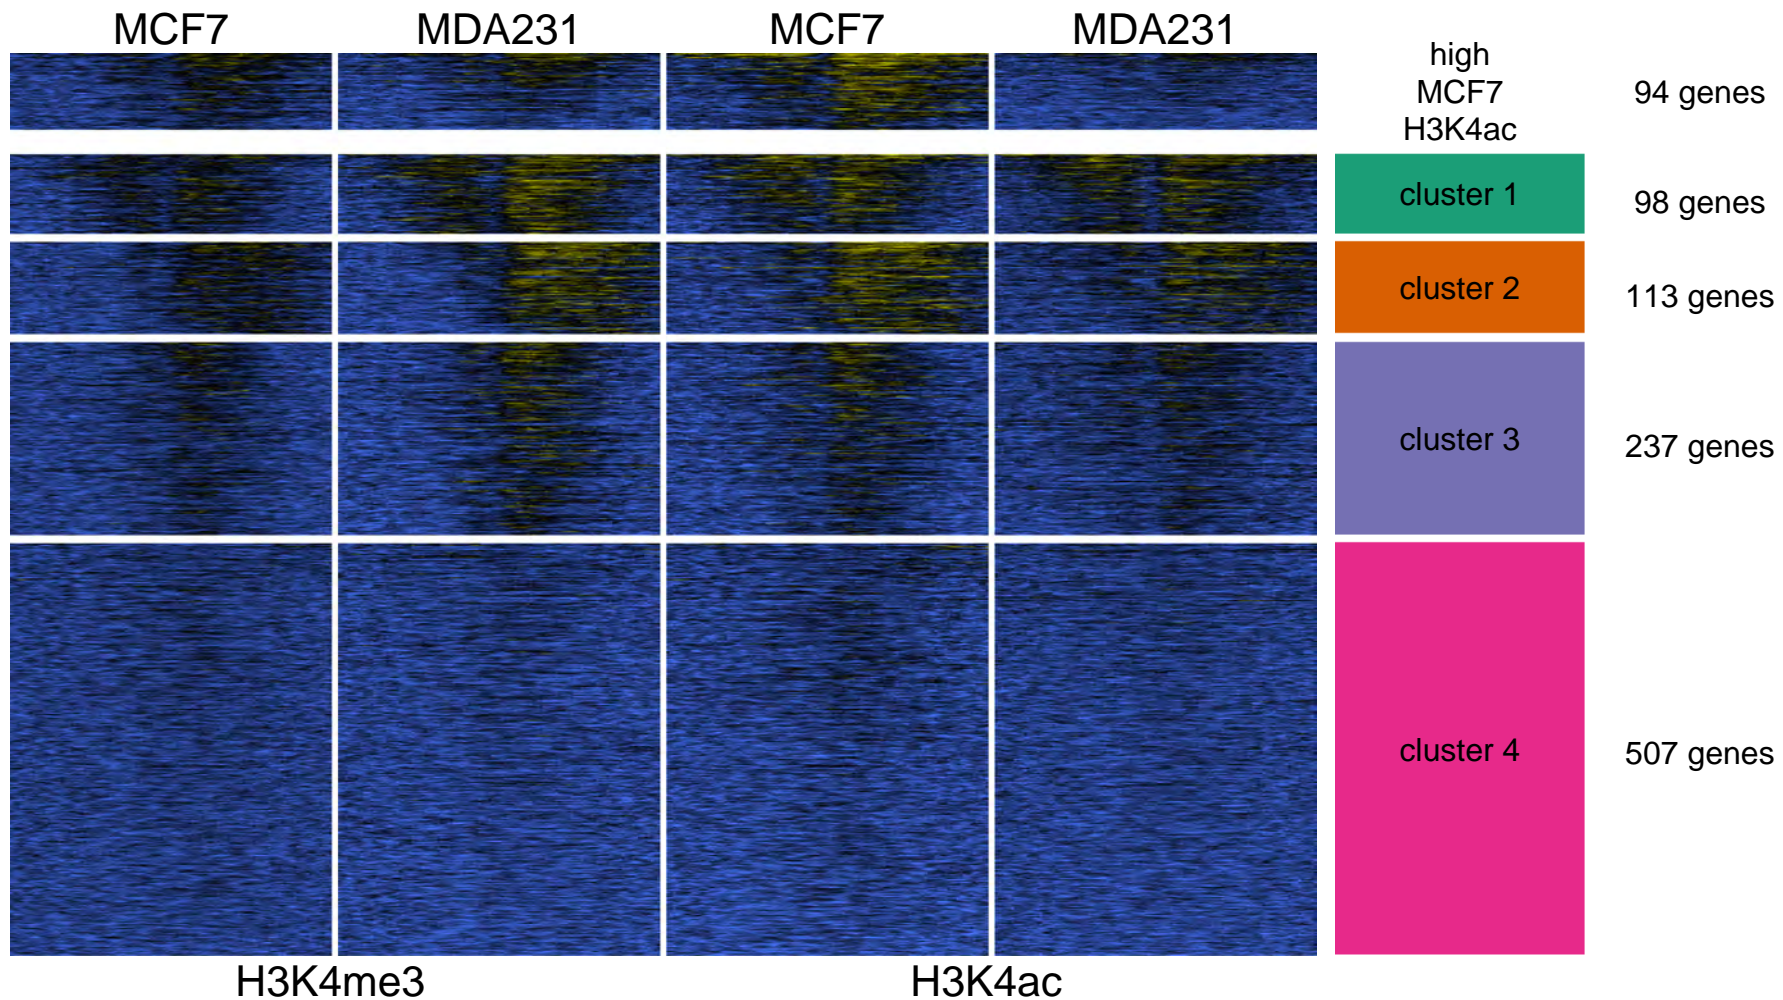



# PEREZ\_TP63\_TARGETS

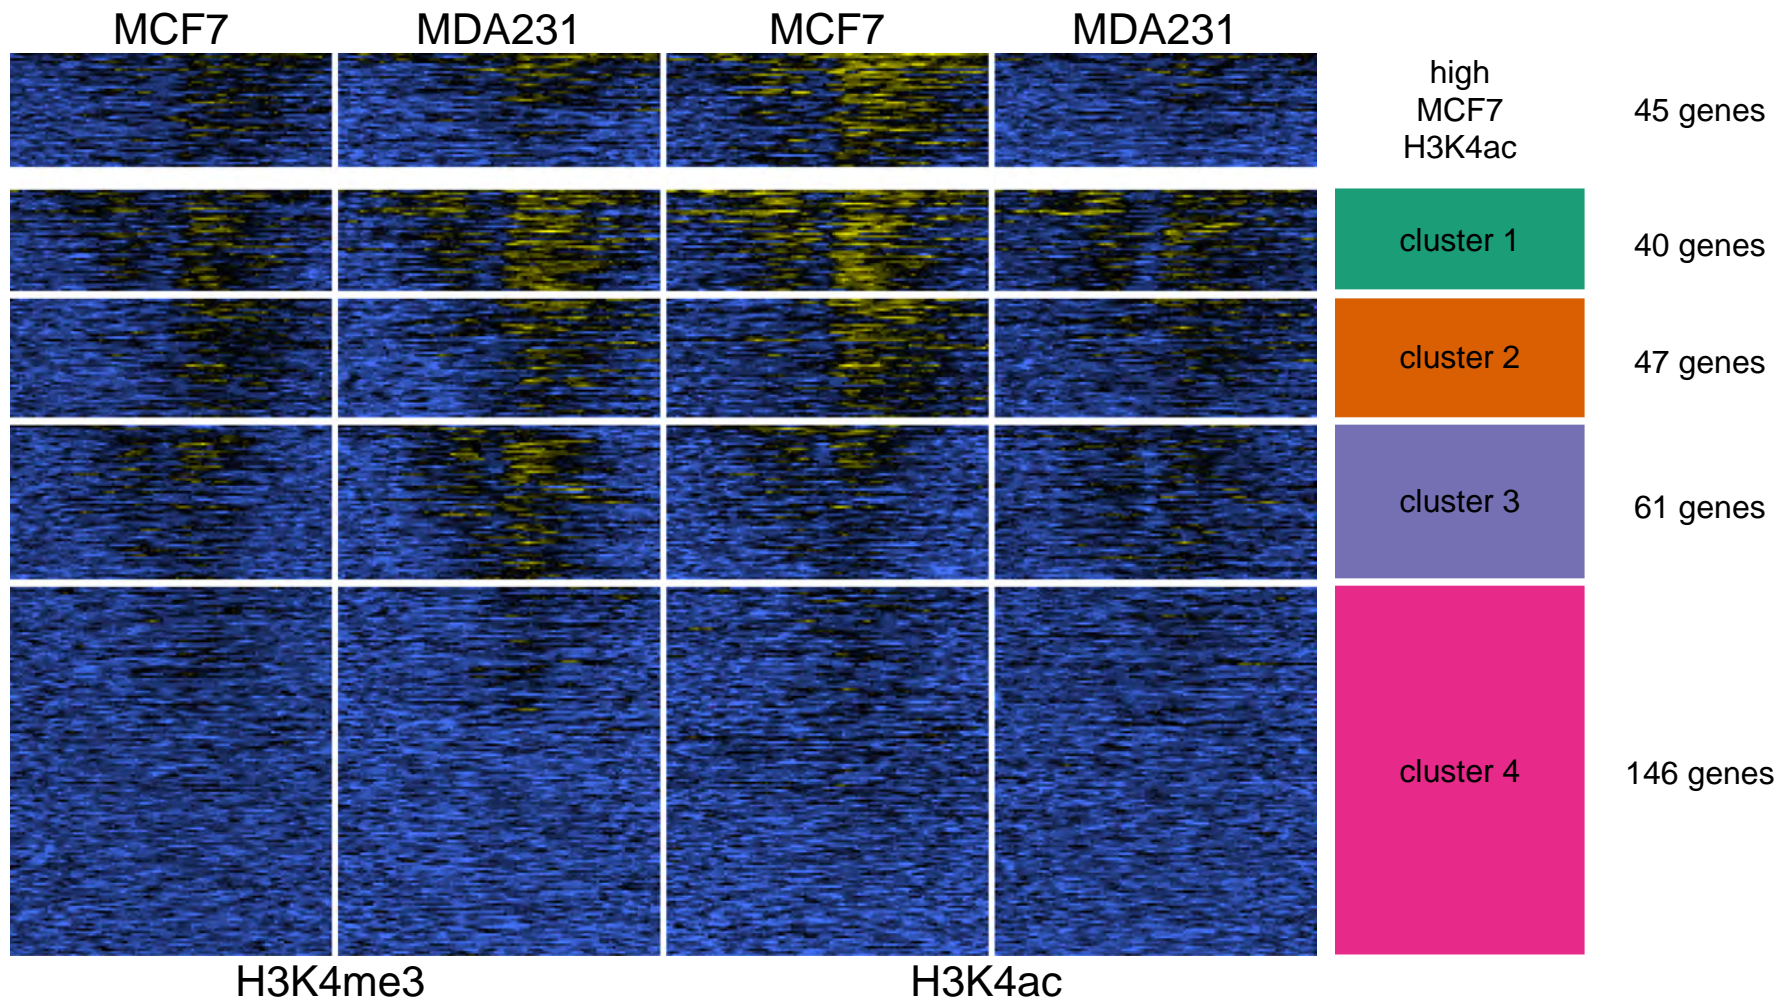

log<sub>2</sub> FE

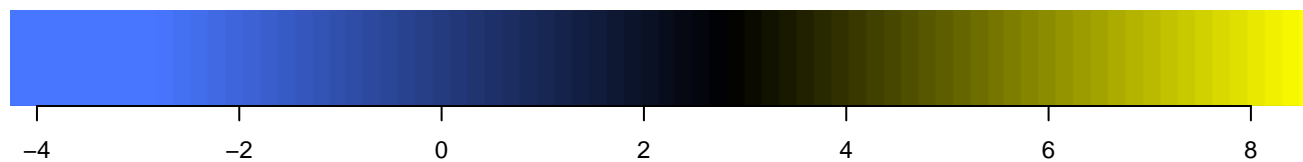

# RAF\_UP.V1\_DN

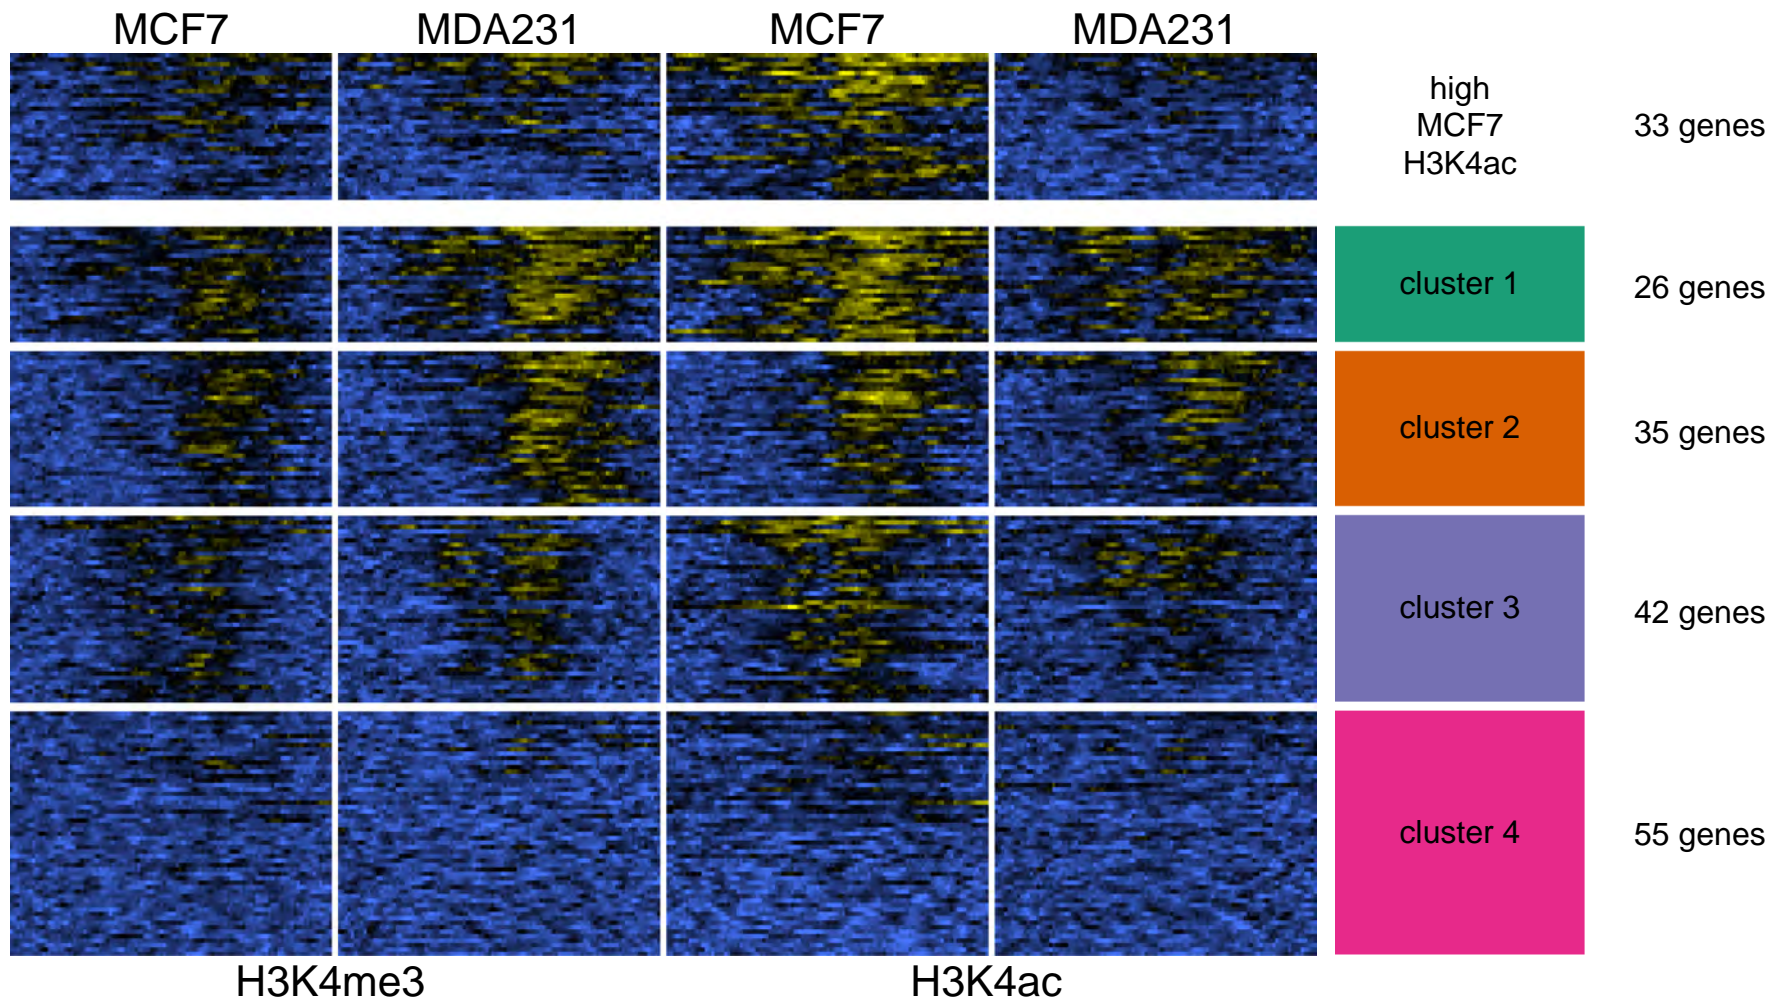

log2 FE

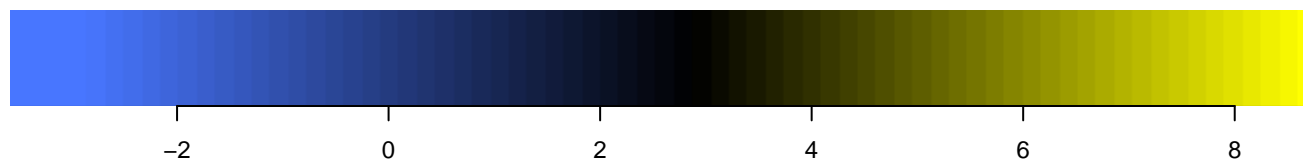

# SMID\_BREAST\_CANCER\_BASAL\_DN

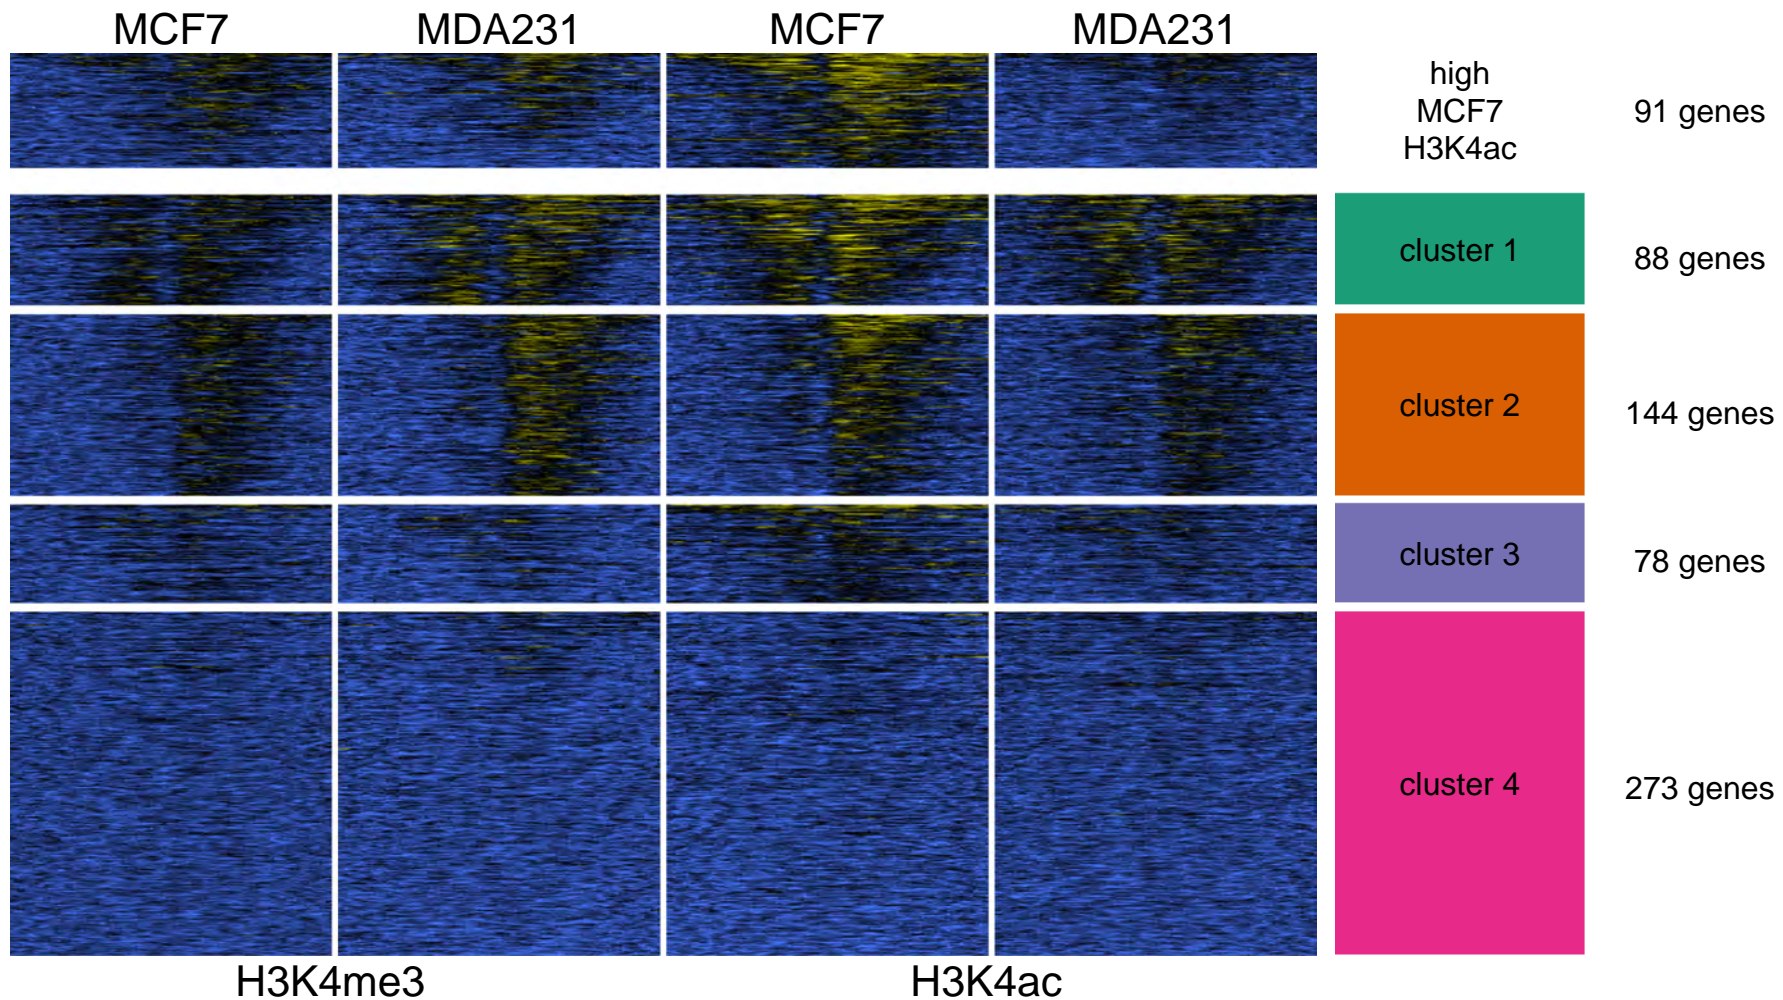

# SMID\_BREAST\_CANCER\_LUMINAL\_B\_UP

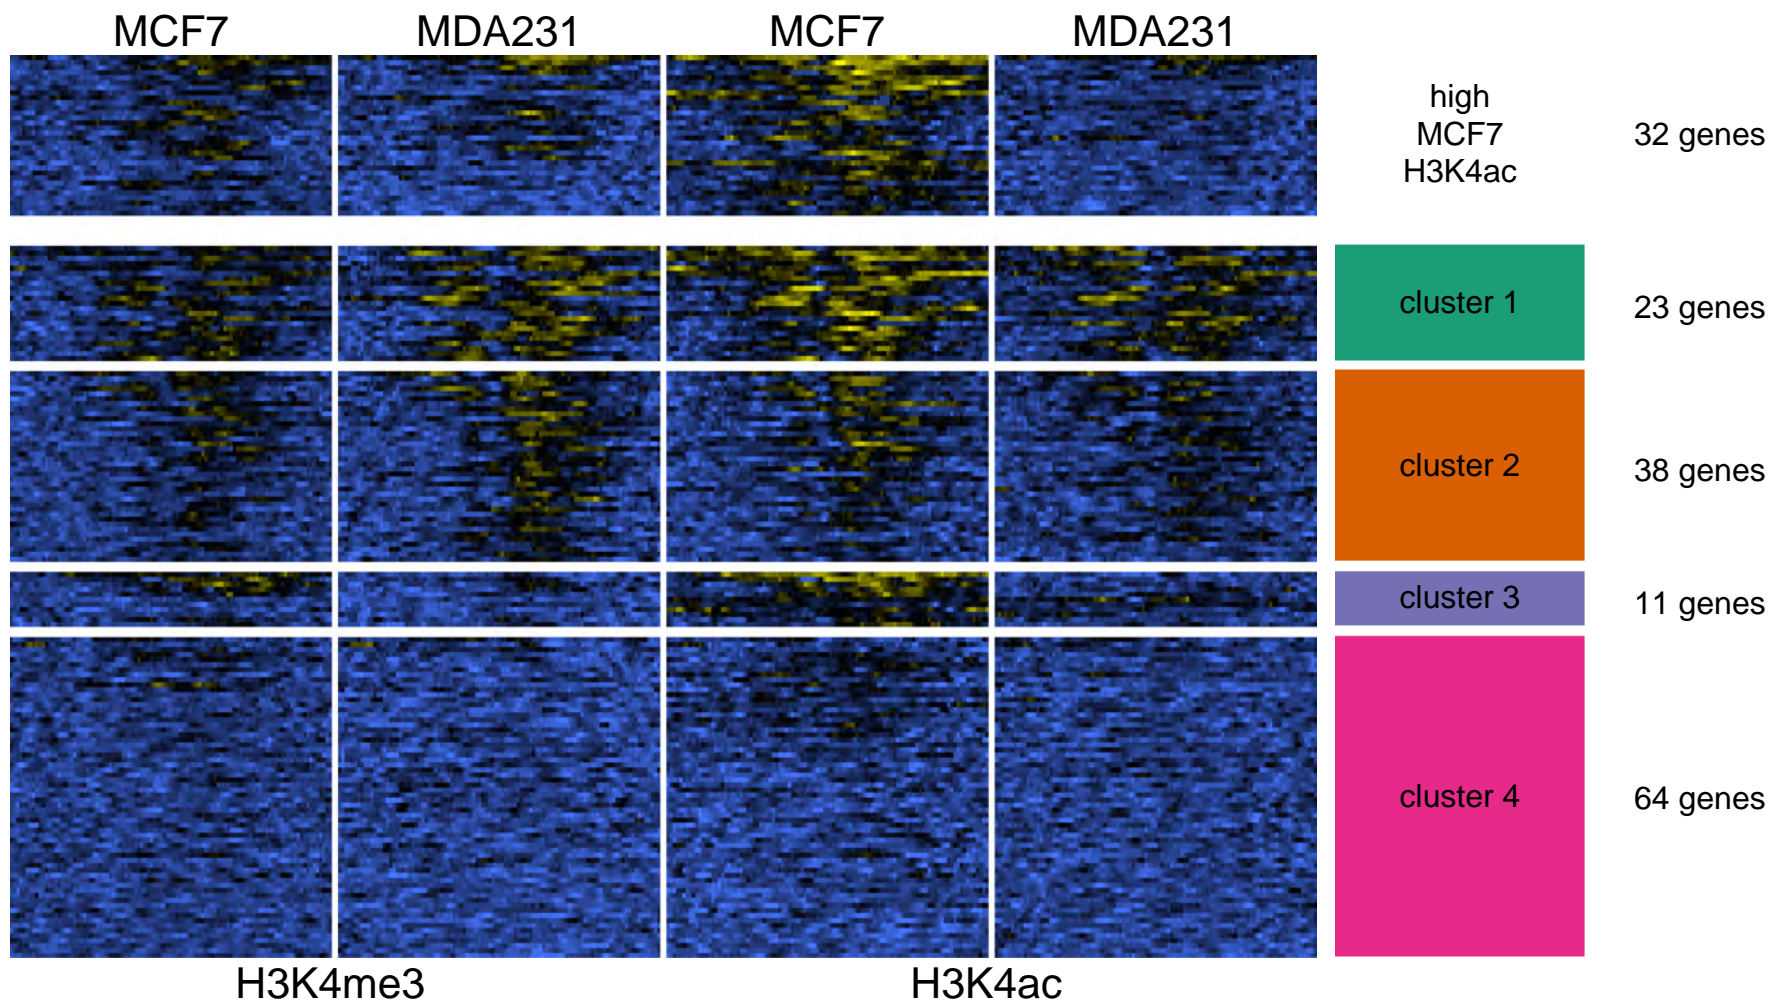

log2 FE

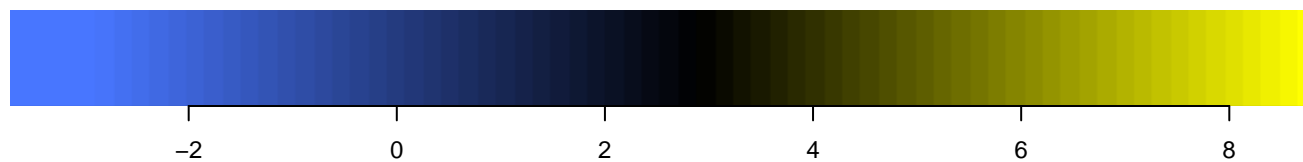

# VANTVEER\_BREAST\_CANCER\_ESR1\_UP

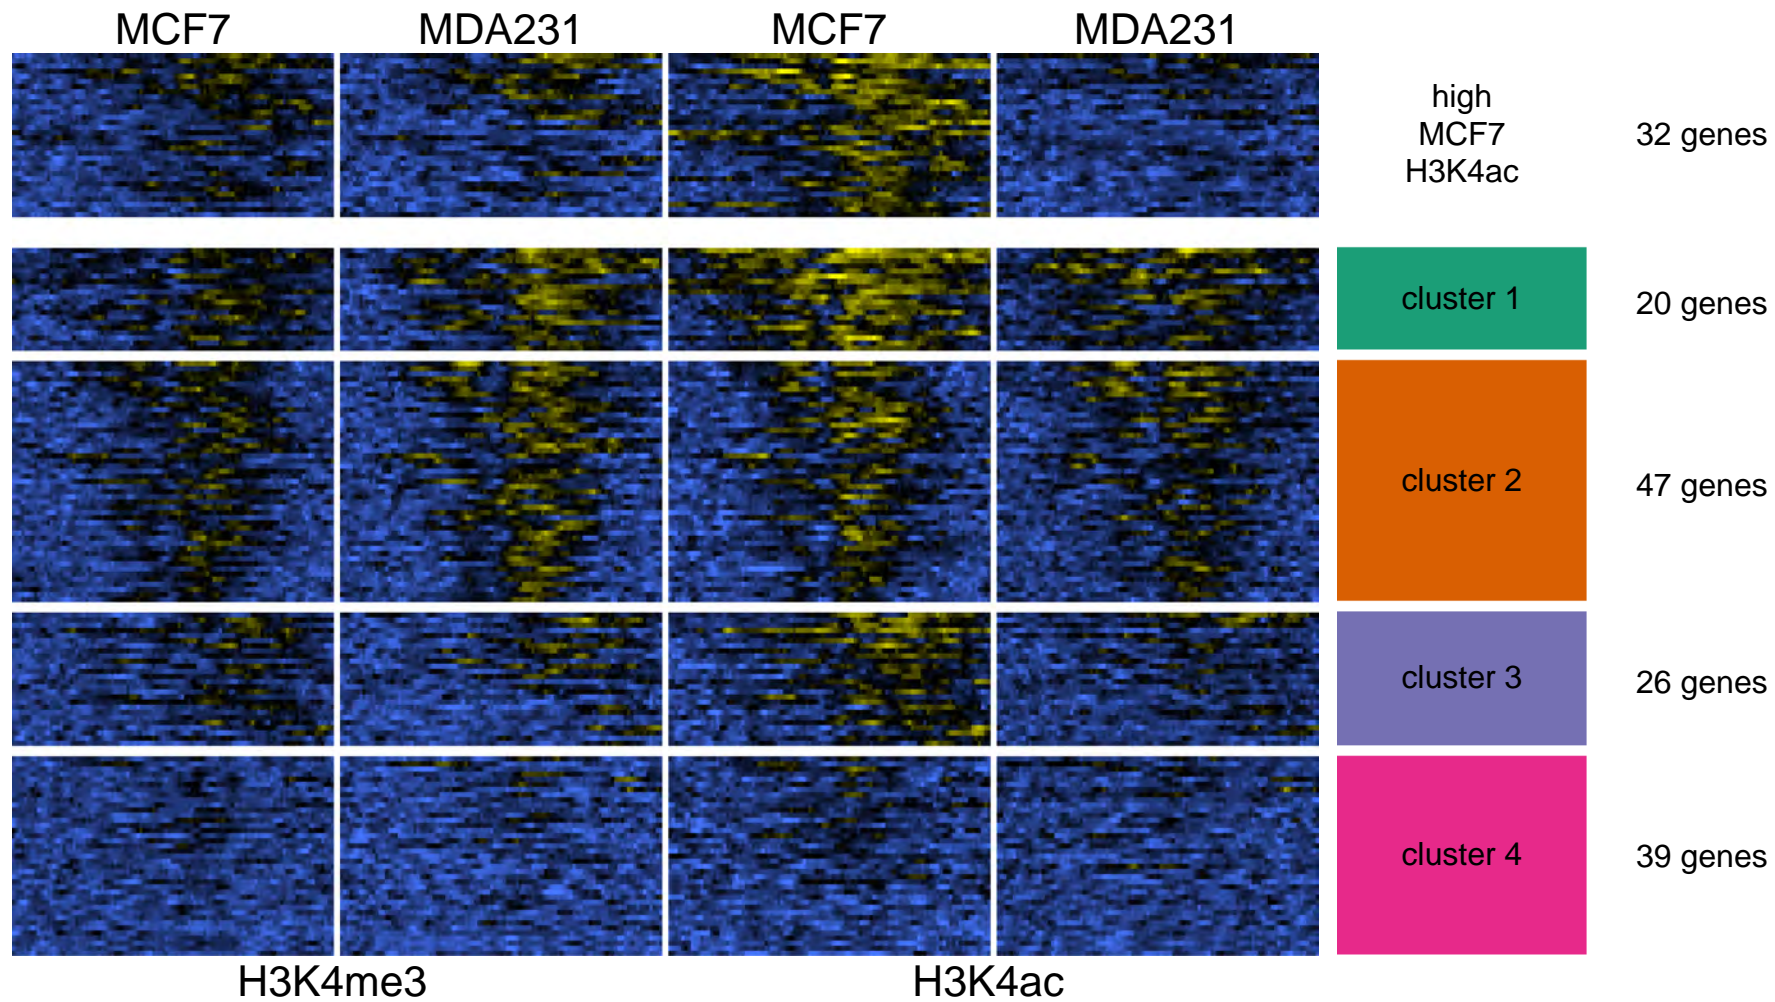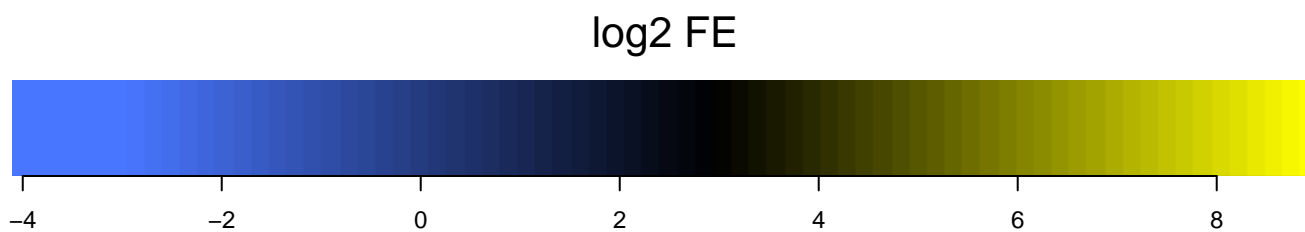

# CHARAFE\_BREAST\_CANCER\_LUMINAL\_VS\_BASAL\_DN

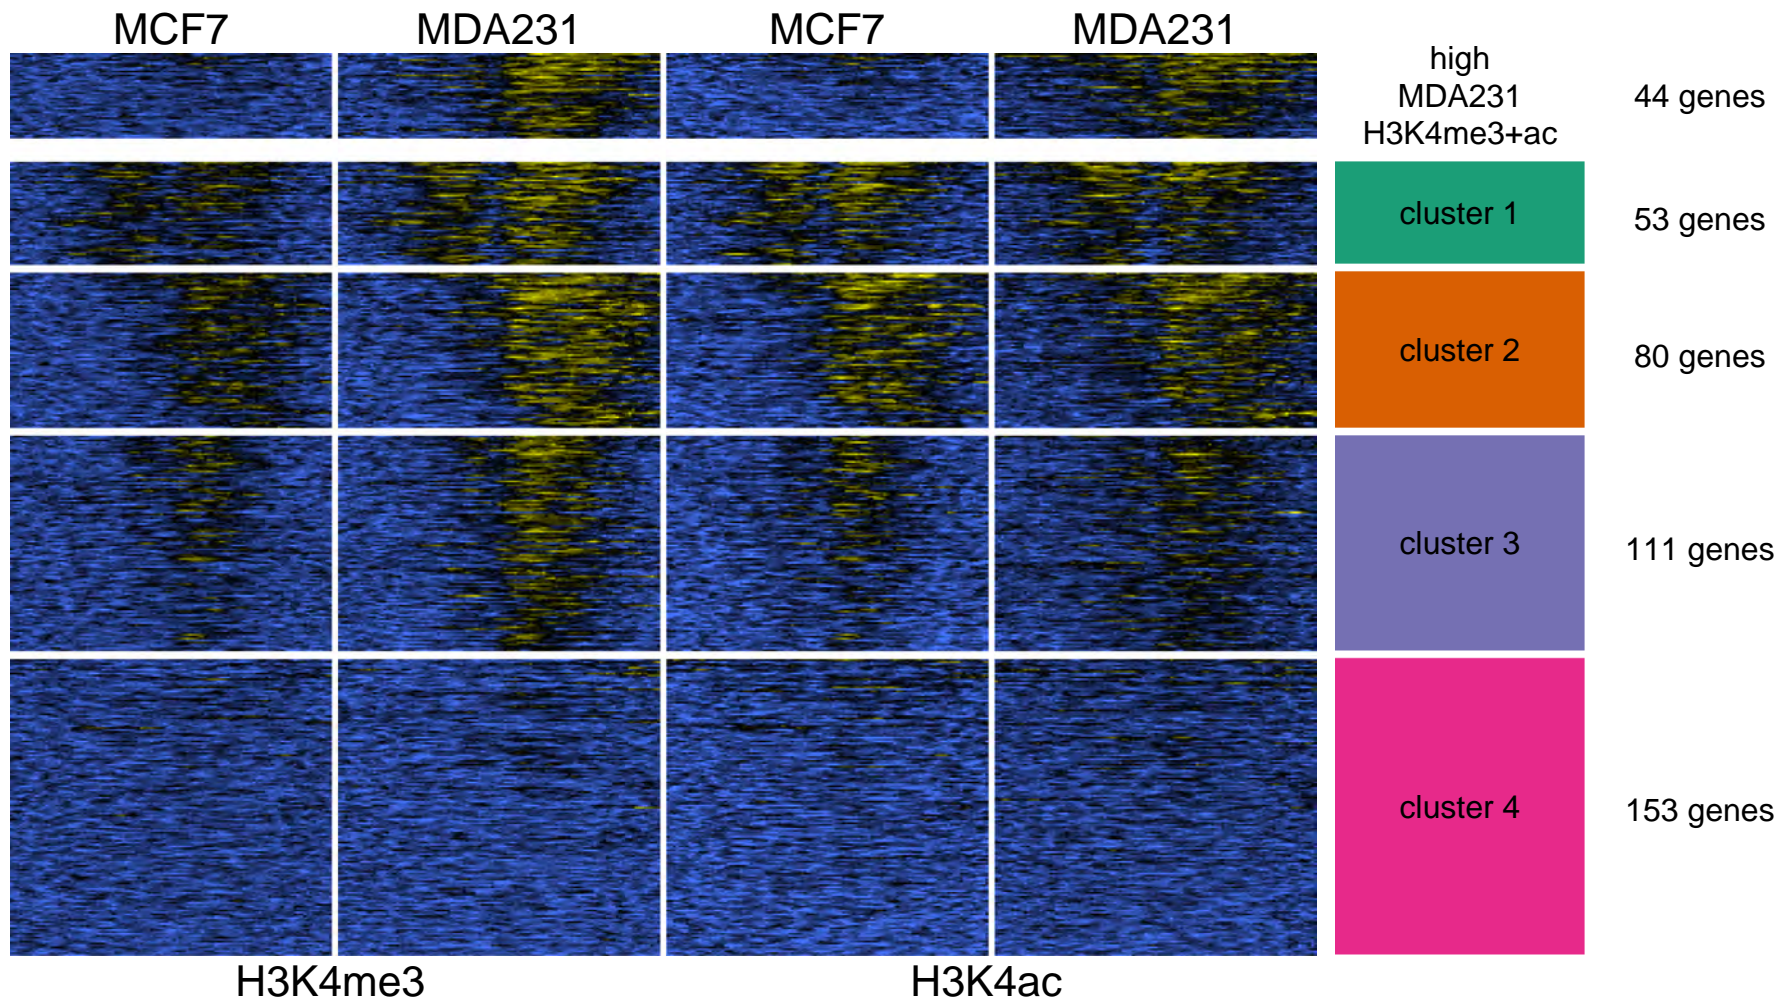

# CHARAFE\_BREAST\_CANCER\_LUMINAL\_VS\_MESENCHYMAL\_DN

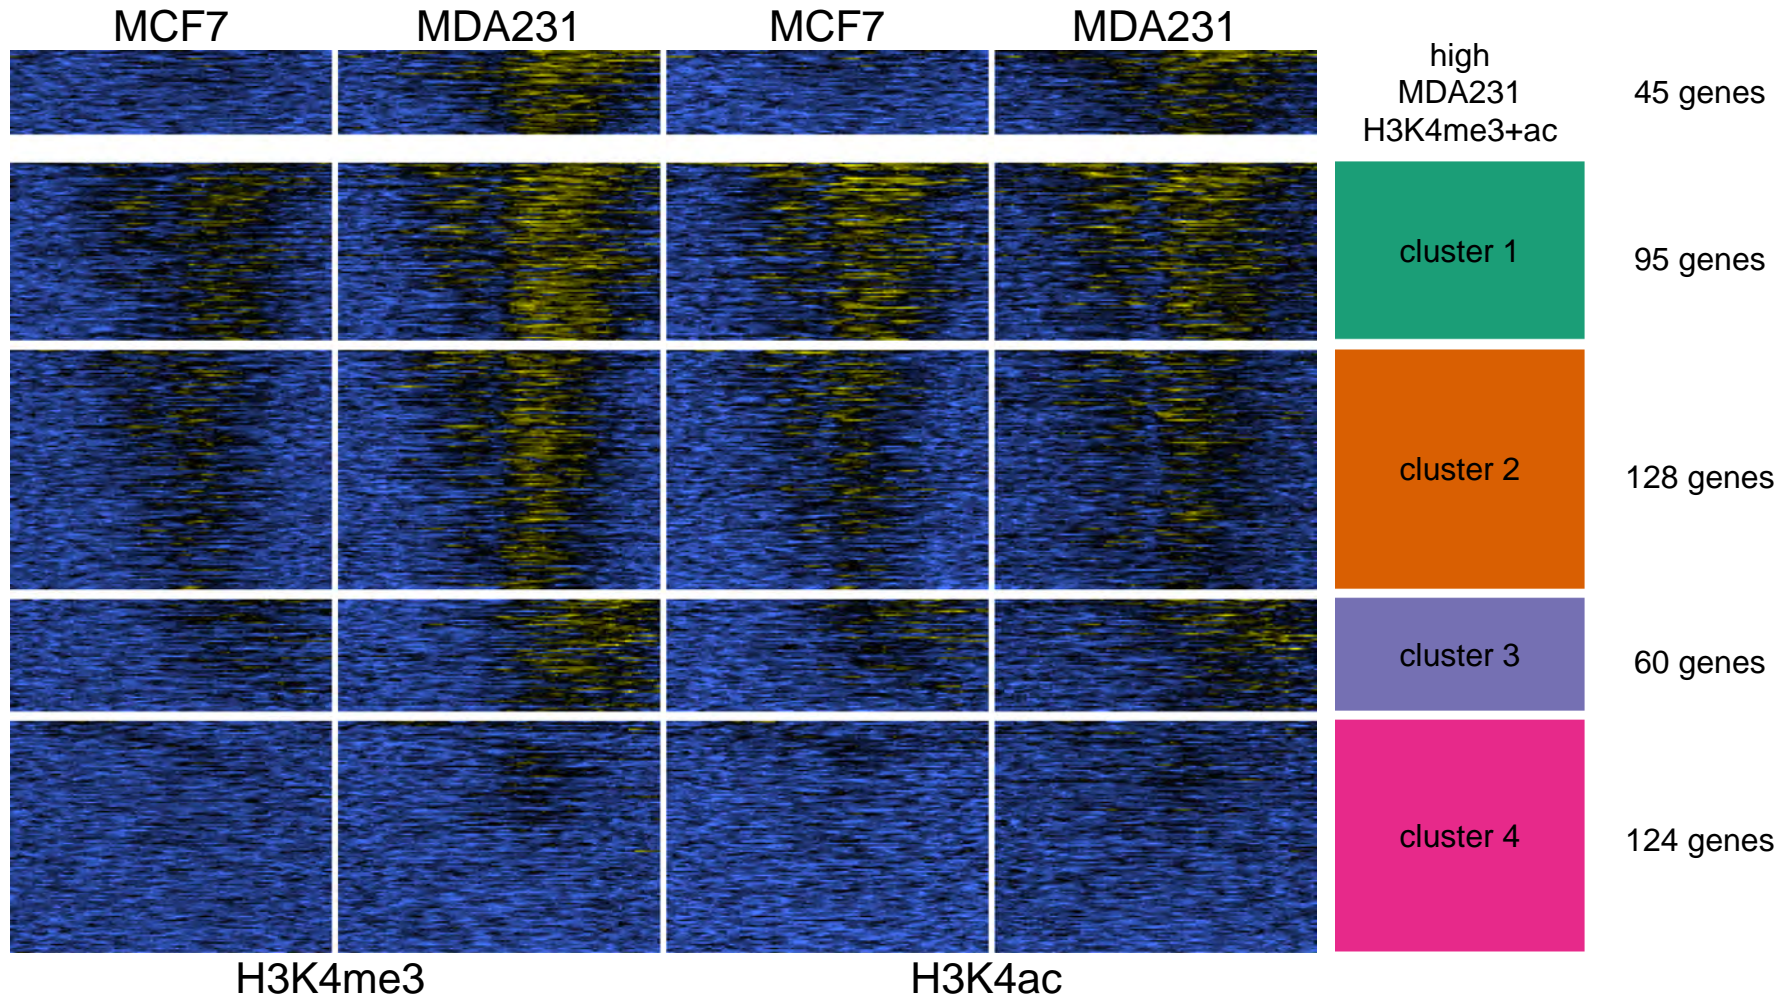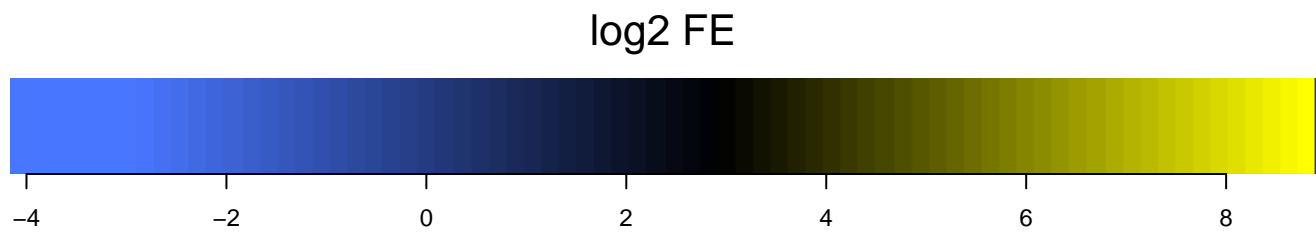

# LIU\_PROSTATE\_CANCER\_DN

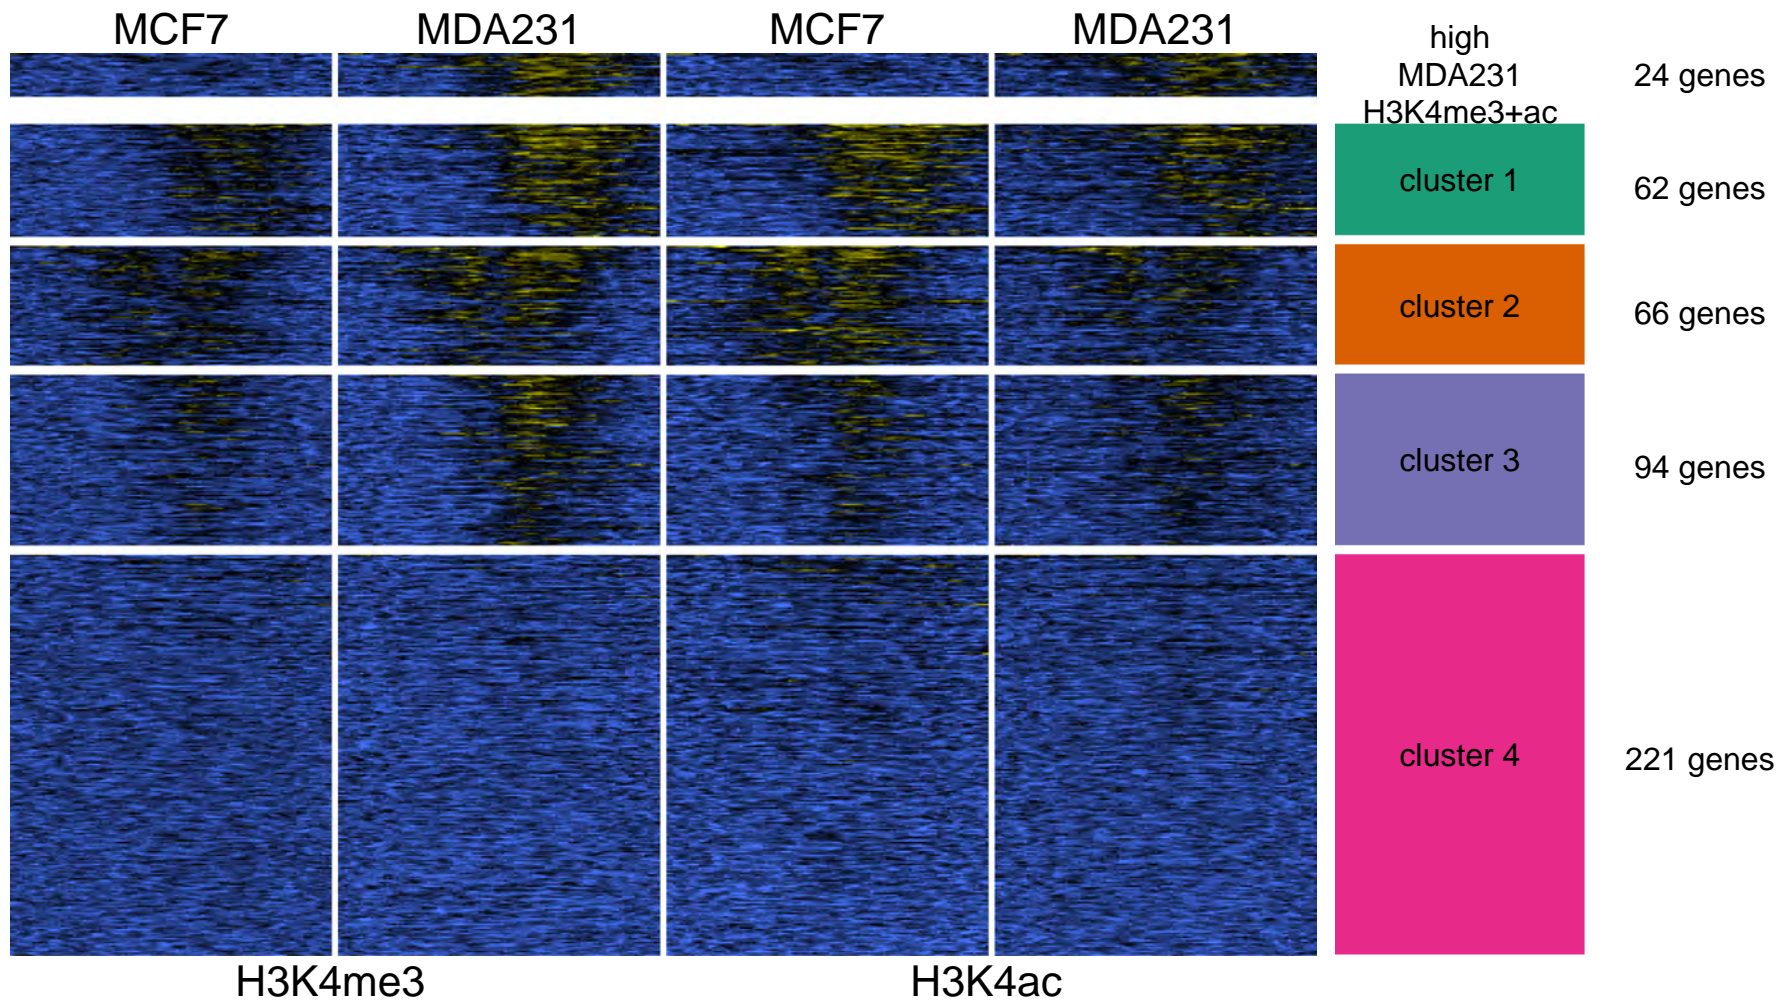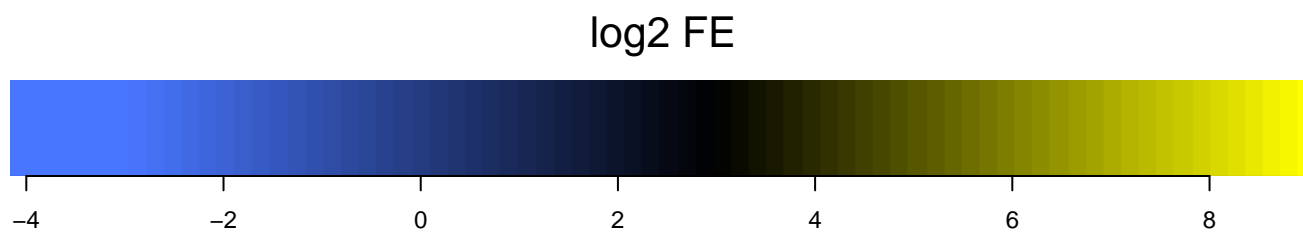



# SCHUETZ\_BREAST\_CANCER\_DUCTAL\_INVASIVE\_UP

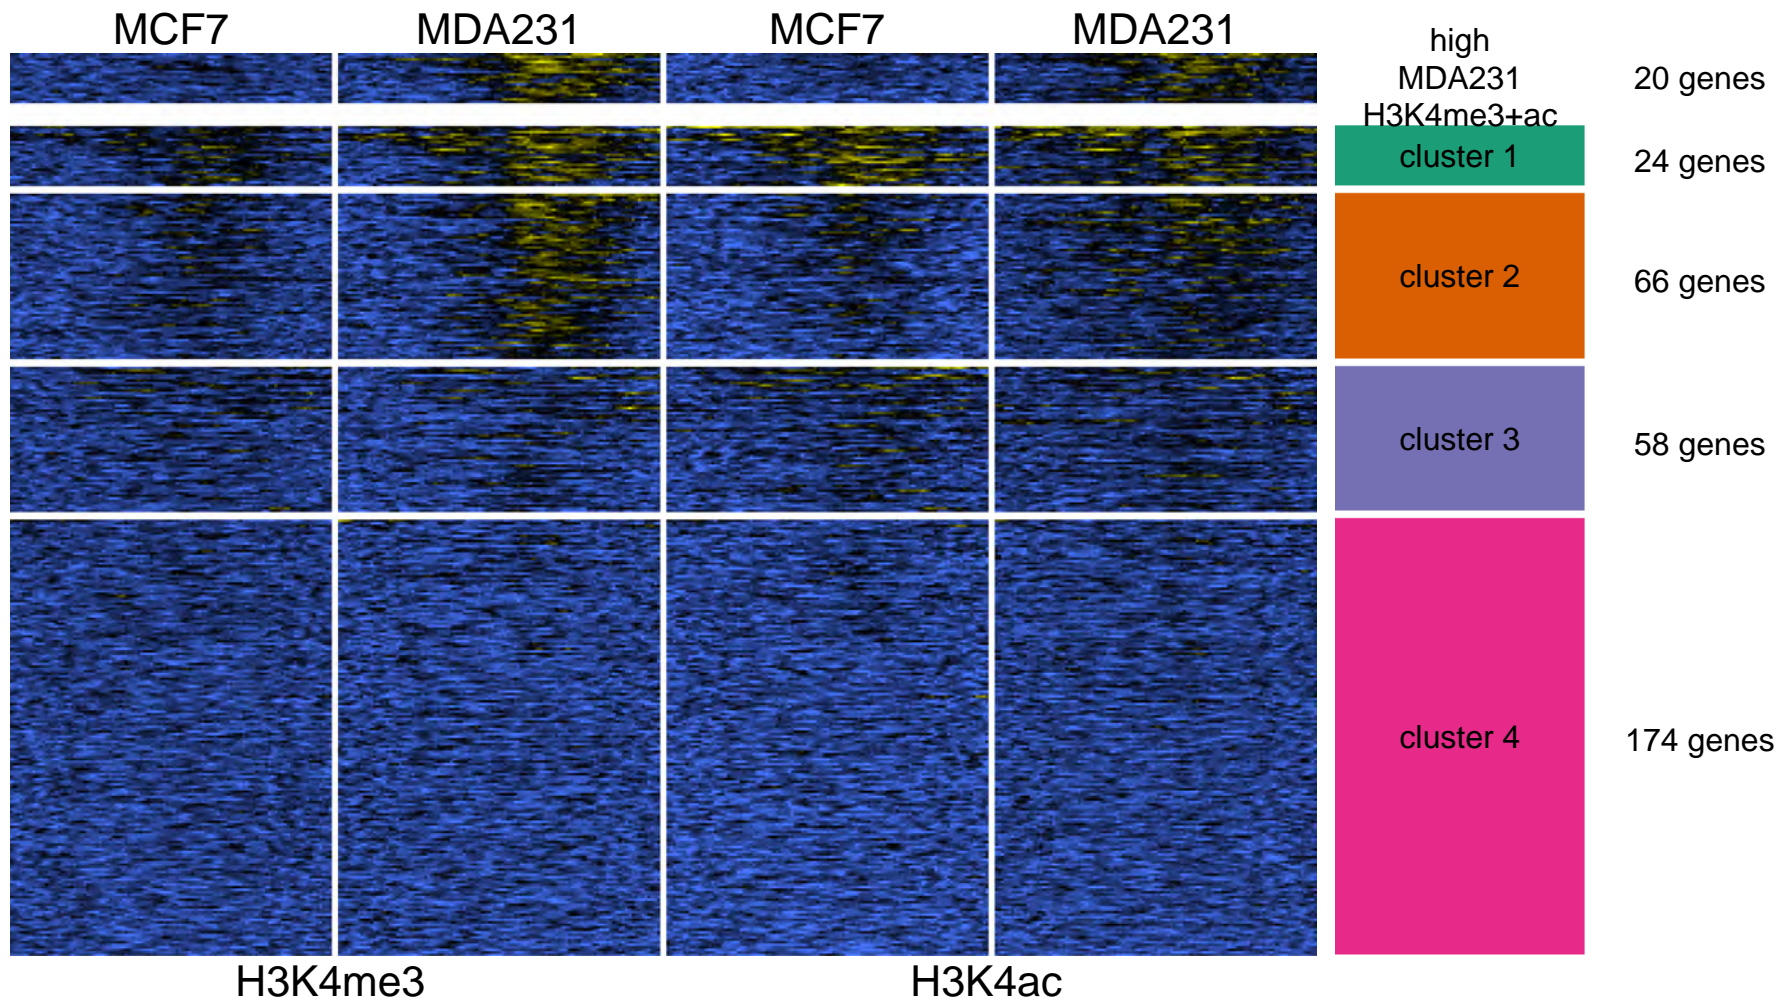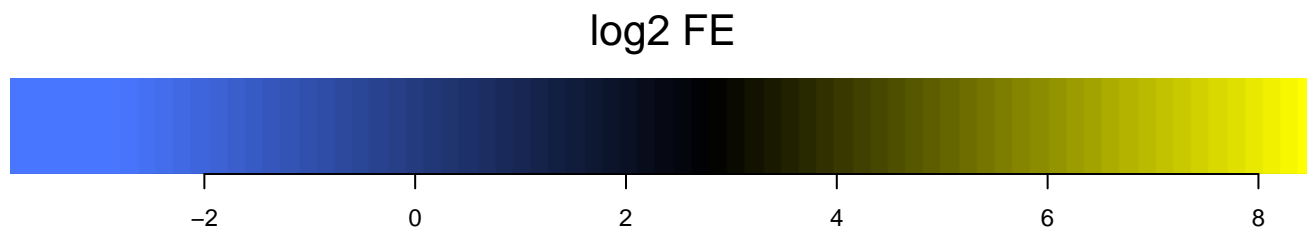

# WU\_CELL\_MIGRATION

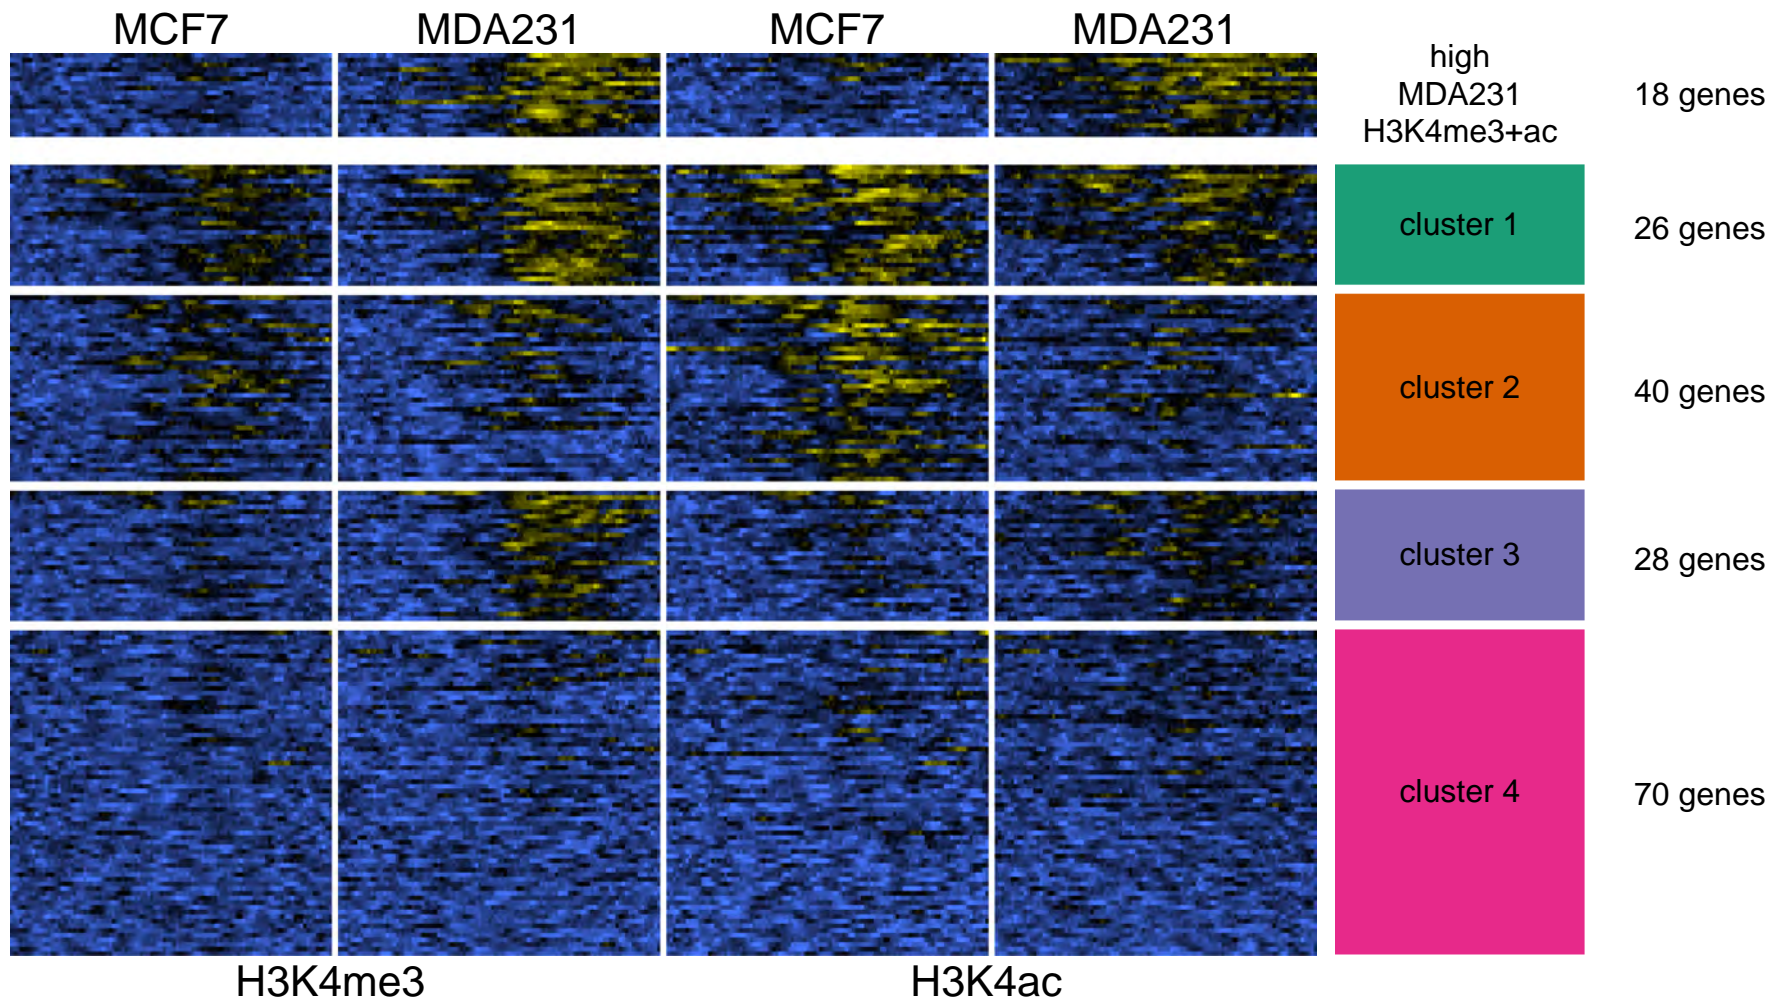

MCF7

MDA231

MCF7

MDA231

high  
MDA231  
H3K4me3+ac

18 genes

cluster 1

26 genes

cluster 2

40 genes

cluster 3

28 genes

cluster 4

70 genes

H3K4me3

H3K4ac

log2 FE

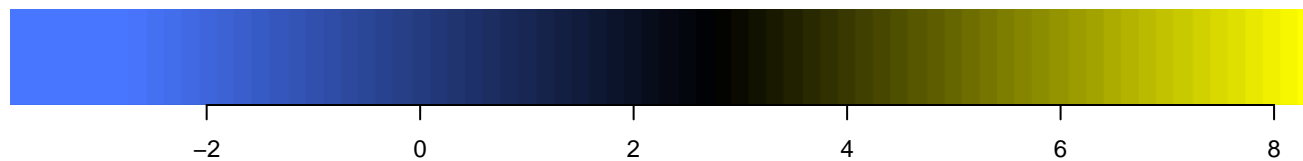

-2

0

2

4

6

8

# CHARAFE\_BREAST\_CANCER\_LUMINAL\_VS\_MESENCHYMAL\_DN

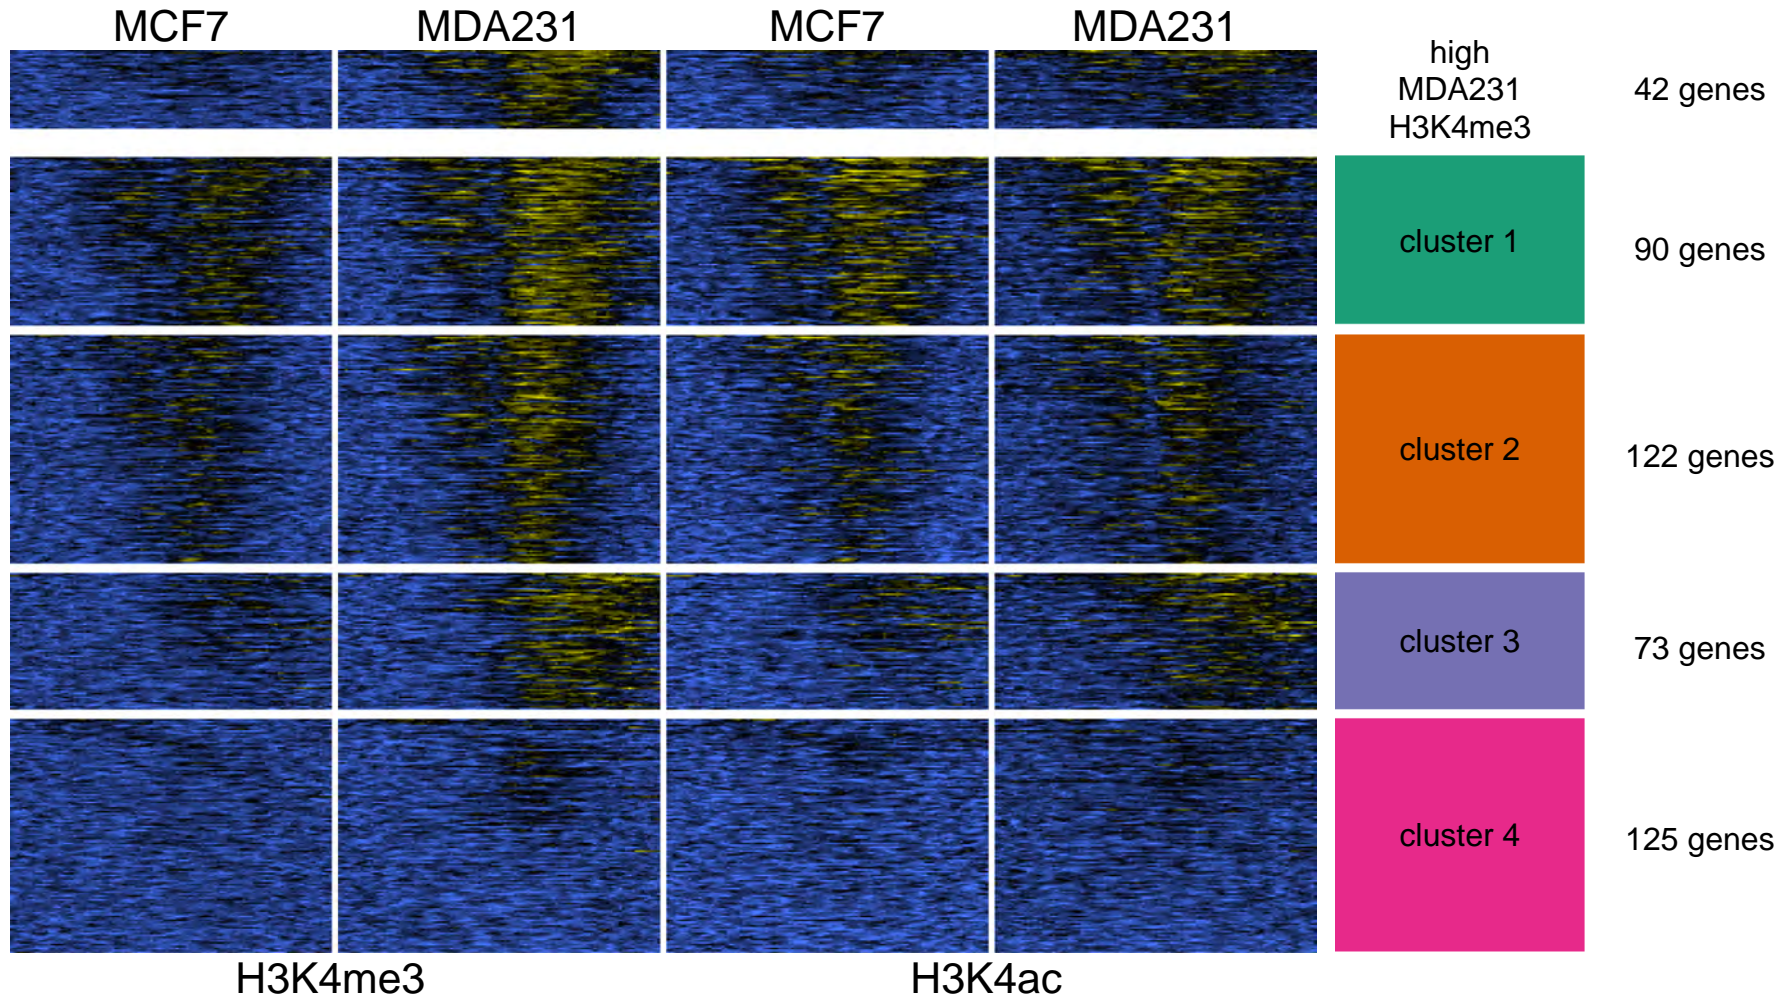

Supplement: oncotarget-07-5094-s002.pdf [file oncotarget-07-5094-s002.pdf]
